# Supplementary material for: Mechanisms of Pinometostat (EPZ-5676) Treatment–Emergent Resistance in MLL -Rearranged Leukemia
Source: Oxford University Press journal article supplement (doi:10.1158/1535-7163.mct-16-0693), 2017-04-20
Supplement: 15357163mct160693-sup-173311_3_unknown_upload_3981937_qqqrbl.xlsx [file 15357163mct160693-sup-173311_3_unknown_upload_3981937_qqqrbl.xlsx]

## Sheet: RAS-related footprints
footprint	target	direction	relationship	reference	context
kin(p(HGNC:MAP2K1))	r(EGID:10397)	+	increases	PubMed_16735500	retinal pigment epithelial cell
kin(p(HGNC:MAP2K1))	r(EGID:1051)	+	increases	PubMed_18555777
kin(p(HGNC:MAP2K1))	r(EGID:10631)	+	increases	PubMed_15121739 /// PubMed_15121739	smooth muscle tissue /// smooth muscle tissue
kin(p(HGNC:MAP2K1))	r(EGID:10694)	+	increases	PubMed_12788937
kin(p(HGNC:MAP2K1))	r(EGID:11082)	+	increases	PubMed_16735500	retinal pigment epithelial cell
kin(p(HGNC:MAP2K1))	r(EGID:1277)	+	increases	PubMed_10493907 /// PubMed_10493907 /// PubMed_10493907 /// PubMed_10493907 /// PubMed_10493907	/// /// /// osteoblast /// osteoblast
kin(p(HGNC:MAP2K1))	r(EGID:1437)	+	increases	PubMed_16735500	retinal pigment epithelial cell
kin(p(HGNC:MAP2K1))	r(EGID:1490)	+	increases	PubMed_15066218
kin(p(HGNC:MAP2K1))	r(EGID:1508)	+	increases	PubMed_16374521	lung
kin(p(HGNC:MAP2K1))	r(EGID:1543)	+	increases	PubMed_15313166
kin(p(HGNC:MAP2K1))	r(EGID:1634)	-	decreases	PubMed_10861206	NIH-3T3 cell
kin(p(HGNC:MAP2K1))	r(EGID:1843)	+	increases	PubMed_9774360	blood vessel smooth muscle
kin(p(HGNC:MAP2K1))	r(EGID:1847)	+	increases	PubMed_16735500	retinal pigment epithelial cell
kin(p(HGNC:MAP2K1))	r(EGID:1848)	+	increases	PubMed_16735500	retinal pigment epithelial cell
kin(p(HGNC:MAP2K1))	r(EGID:185)	+	increases	PubMed_14567501
kin(p(HGNC:MAP2K1))	r(EGID:1942)	+	increases	PubMed_16735500	retinal pigment epithelial cell
kin(p(HGNC:MAP2K1))	r(EGID:1958)	+	increases	PubMed_16103054 /// PubMed_16735500	Head and Neck Neoplasms /// retinal pigment epithelial cell
kin(p(HGNC:MAP2K1))	r(EGID:1960)	+	increases	PubMed_16735500	retinal pigment epithelial cell
kin(p(HGNC:MAP2K1))	r(EGID:22822)	+	increases	PubMed_16735500	retinal pigment epithelial cell
kin(p(HGNC:MAP2K1))	r(EGID:231)	+	increases	PubMed_11440832 /// PubMed_11440832	smooth muscle tissue /// smooth muscle tissue
kin(p(HGNC:MAP2K1))	r(EGID:2353)	+	increases	PubMed_11571649 /// PubMed_16735500	/// retinal pigment epithelial cell
kin(p(HGNC:MAP2K1))	r(EGID:2355)	+	increases	PubMed_10359014 /// PubMed_9858556	/// rat-1 cell
kin(p(HGNC:MAP2K1))	r(EGID:26298)	+	increases	PubMed_12444029	lung
kin(p(HGNC:MAP2K1))	r(EGID:276)	+	increases	PubMed_11025443	submandibular gland
kin(p(HGNC:MAP2K1))	r(EGID:277)	+	increases	PubMed_11025443	submandibular gland
kin(p(HGNC:MAP2K1))	r(EGID:278)	+	increases	PubMed_11025443	submandibular gland
kin(p(HGNC:MAP2K1))	r(EGID:2796)	+	increases	PubMed_12138087
kin(p(HGNC:MAP2K1))	r(EGID:2919)	+	increases	PubMed_16374521 /// PubMed_16735500	lung /// retinal pigment epithelial cell
kin(p(HGNC:MAP2K1))	r(EGID:2920)	+	increases	PubMed_16735500	retinal pigment epithelial cell
kin(p(HGNC:MAP2K1))	r(EGID:2921)	+	increases	PubMed_16735500	retinal pigment epithelial cell
kin(p(HGNC:MAP2K1))	r(EGID:3037)	+	increases	PubMed_16735500	retinal pigment epithelial cell
kin(p(HGNC:MAP2K1))	r(EGID:3162)	-	decreases	PubMed_12230870	cardiovascular system endothelium
kin(p(HGNC:MAP2K1))	r(EGID:330)	+	increases	PubMed_16735500	retinal pigment epithelial cell
kin(p(HGNC:MAP2K1))	r(EGID:3320)	+	increases	PubMed_11834446
kin(p(HGNC:MAP2K1))	r(EGID:3383)	+	increases	PubMed_16735500	retinal pigment epithelial cell
kin(p(HGNC:MAP2K1))	r(EGID:3490)	+	increases	PubMed_18267069	melanocyte
kin(p(HGNC:MAP2K1))	r(EGID:3553)	+	increases	PubMed_14557365 /// PubMed_16735500 /// PubMed_17404266	cardiovascular system_smooth muscle cell /// retinal pigment epithelial cell /// RAW 264.7 cell
kin(p(HGNC:MAP2K1))	r(EGID:3569)	+	increases	PubMed_16735500	retinal pigment epithelial cell
kin(p(HGNC:MAP2K1))	r(EGID:3576)	+	increases	PubMed_16735500	retinal pigment epithelial cell
kin(p(HGNC:MAP2K1))	r(EGID:3589)	+	increases	PubMed_16735500	retinal pigment epithelial cell
kin(p(HGNC:MAP2K1))	r(EGID:374)	+	increases	PubMed_16735500	retinal pigment epithelial cell
kin(p(HGNC:MAP2K1))	r(EGID:3856)	+	increases	PubMed_11010814
kin(p(HGNC:MAP2K1))	r(EGID:3958)	+	increases	PubMed_12788225	macrophage
kin(p(HGNC:MAP2K1))	r(EGID:4129)	+	increases	PubMed_11956220 /// PubMed_11956220	///
kin(p(HGNC:MAP2K1))	r(EGID:4312)	+	increases	PubMed_10912795 /// PubMed_16735500	/// retinal pigment epithelial cell
kin(p(HGNC:MAP2K1))	r(EGID:4313)	+	increases	PubMed_12087091 /// PubMed_16374521	A549 cell /// lung
kin(p(HGNC:MAP2K1))	r(EGID:4316)	+	increases	PubMed_11922392
kin(p(HGNC:MAP2K1))	r(EGID:4318)	+	increases	PubMed_10660623 /// PubMed_16374521	/// lung
kin(p(HGNC:MAP2K1))	r(EGID:4319)	+	increases	PubMed_16735500	retinal pigment epithelial cell
kin(p(HGNC:MAP2K1))	r(EGID:4321)	+	increases	PubMed_16374521	lung
kin(p(HGNC:MAP2K1))	r(EGID:4323)	+	increases	PubMed_16374521	lung
kin(p(HGNC:MAP2K1))	r(EGID:4585)	+	increases	PubMed_10980611
kin(p(HGNC:MAP2K1))	r(EGID:4656)	-	decreases	PubMed_12959952 /// PubMed_12959952	///
kin(p(HGNC:MAP2K1))	r(EGID:4783)	+	increases	PubMed_12729908 /// PubMed_12729908	NIH-3T3 cell /// NIH-3T3 cell
kin(p(HGNC:MAP2K1))	r(EGID:4792)	+	increases	PubMed_16735500	retinal pigment epithelial cell
kin(p(HGNC:MAP2K1))	r(EGID:4843)	+	increases	PubMed_11131279
kin(p(HGNC:MAP2K1))	r(EGID:4846)	+	increases	PubMed_11042169
kin(p(HGNC:MAP2K1))	r(EGID:5054)	+	increases	PubMed_12090757	Calu-1 cell
kin(p(HGNC:MAP2K1))	r(EGID:5055)	+	increases	PubMed_16735500	retinal pigment epithelial cell
kin(p(HGNC:MAP2K1))	r(EGID:5154)	+	increases	PubMed_16103054	Head and Neck Neoplasms
kin(p(HGNC:MAP2K1))	r(EGID:5187)	+	increases	PubMed_11959112 /// PubMed_11959112 /// PubMed_11959112 /// PubMed_12729908 /// PubMed_12729908	/// NIH-3T3 cell /// NIH-3T3 cell /// NIH-3T3 cell /// NIH-3T3 cell
kin(p(HGNC:MAP2K1))	r(EGID:5265)	+	increases	PubMed_16374521	lung
kin(p(HGNC:MAP2K1))	r(EGID:5327)	+	increases	PubMed_12090757	Calu-1 cell
kin(p(HGNC:MAP2K1))	r(EGID:5328)	+	increases	PubMed_10347197
kin(p(HGNC:MAP2K1))	r(EGID:54206)	+	increases	PubMed_15358516
kin(p(HGNC:MAP2K1))	r(EGID:5468)	-	decreases	PubMed_14750214	Caco-2 cell
kin(p(HGNC:MAP2K1))	r(EGID:55612)	+	increases	PubMed_16735500	retinal pigment epithelial cell
kin(p(HGNC:MAP2K1))	r(EGID:5743)	+	increases	PubMed_16735500	retinal pigment epithelial cell
kin(p(HGNC:MAP2K1))	r(EGID:5744)	+	increases	PubMed_16735500	retinal pigment epithelial cell
kin(p(HGNC:MAP2K1))	r(EGID:5806)	+	increases	PubMed_16735500	retinal pigment epithelial cell
kin(p(HGNC:MAP2K1))	r(EGID:6303)	-	decreases	PubMed_14750214	Caco-2 cell
kin(p(HGNC:MAP2K1))	r(EGID:6347)	+	increases	PubMed_16735500	retinal pigment epithelial cell
kin(p(HGNC:MAP2K1))	r(EGID:6348)	+	increases	PubMed_16374521	lung
kin(p(HGNC:MAP2K1))	r(EGID:6351)	+	increases	PubMed_16374521	lung
kin(p(HGNC:MAP2K1))	r(EGID:6352)	+	increases	PubMed_16374521	lung
kin(p(HGNC:MAP2K1))	r(EGID:650)	+	increases	PubMed_16735500	retinal pigment epithelial cell
kin(p(HGNC:MAP2K1))	r(EGID:6528)	-	decreases	PubMed_12853977
kin(p(HGNC:MAP2K1))	r(EGID:6575)	+	increases	PubMed_14584042	bone marrow
kin(p(HGNC:MAP2K1))	r(EGID:6648)	+	increases	PubMed_16735500	retinal pigment epithelial cell
kin(p(HGNC:MAP2K1))	r(EGID:669)	+	increases	PubMed_16735500	retinal pigment epithelial cell
kin(p(HGNC:MAP2K1))	r(EGID:6696)	+	increases	PubMed_14670931 /// PubMed_15121739 /// PubMed_15121739	smooth muscle tissue /// smooth muscle tissue /// smooth muscle tissue
kin(p(HGNC:MAP2K1))	r(EGID:6781)	+	increases	PubMed_16735500	retinal pigment epithelial cell
kin(p(HGNC:MAP2K1))	r(EGID:7052)	+	increases	PubMed_12832399
kin(p(HGNC:MAP2K1))	r(EGID:7056)	+	increases	PubMed_16735500	retinal pigment epithelial cell
kin(p(HGNC:MAP2K1))	r(EGID:7128)	+	increases	PubMed_16735500	retinal pigment epithelial cell
kin(p(HGNC:MAP2K1))	r(EGID:7291)	+	increases	PubMed_11323435	NIH-3T3 cell
kin(p(HGNC:MAP2K1))	r(EGID:7422)	+	increases	PubMed_16103054	Head and Neck Neoplasms
kin(p(HGNC:MAP2K1))	r(EGID:7980)	+	increases	PubMed_16735500	retinal pigment epithelial cell
kin(p(HGNC:MAP2K1))	r(EGID:80149)	+	increases	PubMed_16735500	retinal pigment epithelial cell
kin(p(HGNC:MAP2K1))	r(EGID:8061)	+	increases	PubMed_9858556	rat-1 cell
kin(p(HGNC:MAP2K1))	r(EGID:8864)	+	increases	PubMed_11959112 /// PubMed_11959112 /// PubMed_12729908 /// PubMed_12729908	NIH-3T3 cell /// NIH-3T3 cell /// NIH-3T3 cell /// NIH-3T3 cell
kin(p(HGNC:MAP2K1))	r(EGID:894)	+	increases	PubMed_11823472	B cell
kin(p(HGNC:MAP2K1))	r(EGID:9149)	-	decreases	PubMed_12902328	C subscript(2) C subscript(12) cell
kin(p(HGNC:MAP2K1))	r(EGID:999)	-	decreases	PubMed_10712504
kin(p(HGNC:MAPK1))	r(EGID:10109)	-	decreases	PubMed_14704274	Hep G2 cell
kin(p(HGNC:MAPK1))	r(EGID:1026)	+	increases	PubMed_15528212 /// PubMed_15528212 /// PubMed_9892010	/// ///
kin(p(HGNC:MAPK1))	r(EGID:1027)	-	decreases	PubMed_14704274	Hep G2 cell
kin(p(HGNC:MAPK1))	r(EGID:10397)	+	increases	PubMed_16735500	retinal pigment epithelial cell
kin(p(HGNC:MAPK1))	r(EGID:10950)	-	decreases	PubMed_14704274	Hep G2 cell
kin(p(HGNC:MAPK1))	r(EGID:11082)	+	increases	PubMed_16735500	retinal pigment epithelial cell
kin(p(HGNC:MAPK1))	r(EGID:114884)	-	decreases	PubMed_14704274	Hep G2 cell
kin(p(HGNC:MAPK1))	r(EGID:1164)	ambiguous	increases ||| decreases	PubMed_14704274 ||| PubMed_14704274	||| Hep G2 cell
kin(p(HGNC:MAPK1))	r(EGID:1277)	+	increases	PubMed_10493907
kin(p(HGNC:MAPK1))	r(EGID:1278)	+	increases	PubMed_11343241
kin(p(HGNC:MAPK1))	r(EGID:1437)	+	increases	PubMed_16735500	retinal pigment epithelial cell
kin(p(HGNC:MAPK1))	r(EGID:1475)	-	decreases	PubMed_11451947
kin(p(HGNC:MAPK1))	r(EGID:1647)	+	increases	PubMed_11525640
kin(p(HGNC:MAPK1))	r(EGID:1786)	-	decreases	PubMed_15188362
kin(p(HGNC:MAPK1))	r(EGID:1808)	+	increases	PubMed_15207709
kin(p(HGNC:MAPK1))	r(EGID:1843)	+	increases	PubMed_10464250
kin(p(HGNC:MAPK1))	r(EGID:1844)	+	increases	PubMed_8649402 /// PubMed_8649402	T cell /// T cell
kin(p(HGNC:MAPK1))	r(EGID:1846)	+	increases	PubMed_11165042 /// PubMed_11856337	///
kin(p(HGNC:MAPK1))	r(EGID:1847)	+	increases	PubMed_16735500	retinal pigment epithelial cell
kin(p(HGNC:MAPK1))	r(EGID:1848)	+	increases	PubMed_16735500	retinal pigment epithelial cell
kin(p(HGNC:MAPK1))	r(EGID:185)	+	increases	PubMed_11881037
kin(p(HGNC:MAPK1))	r(EGID:1889)	+	increases	PubMed_11577023
kin(p(HGNC:MAPK1))	r(EGID:1906)	-	decreases	PubMed_11577023
kin(p(HGNC:MAPK1))	r(EGID:1910)	+	increases	PubMed_12522118 /// PubMed_12522118	///
kin(p(HGNC:MAPK1))	r(EGID:1942)	+	increases	PubMed_16735500	retinal pigment epithelial cell
kin(p(HGNC:MAPK1))	r(EGID:1958)	+	increases	PubMed_10364249 /// PubMed_11085989 /// PubMed_11331872 /// PubMed_12457461 /// PubMed_12618431 /// PubMed_16735500 /// PubMed_17967787	liver_cancer /// /// /// blood vessel smooth muscle /// stem cell /// retinal pigment epithelial cell /// aorta_smooth muscle cell
kin(p(HGNC:MAPK1))	r(EGID:1960)	+	increases	PubMed_16735500	retinal pigment epithelial cell
kin(p(HGNC:MAPK1))	r(EGID:1969)	-	decreases	PubMed_14704274	Hep G2 cell
kin(p(HGNC:MAPK1))	r(EGID:1978)	-	decreases	PubMed_12618431 /// PubMed_12618431	stem cell ///
kin(p(HGNC:MAPK1))	r(EGID:2002)	+	increases	PubMed_12220502 /// PubMed_12220502	///
kin(p(HGNC:MAPK1))	r(EGID:2152)	+	increases	PubMed_16009787
kin(p(HGNC:MAPK1))	r(EGID:2194)	-	decreases	PubMed_15777261
kin(p(HGNC:MAPK1))	r(EGID:2247)	+	increases	PubMed_10212283
kin(p(HGNC:MAPK1))	r(EGID:22822)	+	increases	PubMed_16735500	retinal pigment epithelial cell
kin(p(HGNC:MAPK1))	r(EGID:2335)	ambiguous	increases ||| decreases	PubMed_12218048 /// PubMed_14704274 ||| PubMed_14704274	mesangial cell /// ||| Hep G2 cell
kin(p(HGNC:MAPK1))	r(EGID:2353)	+	increases	PubMed_10444401 /// PubMed_11053056 /// PubMed_11145955 /// PubMed_15123357 /// PubMed_16729045 /// PubMed_16735500	/// /// /// liver /// /// retinal pigment epithelial cell
kin(p(HGNC:MAPK1))	r(EGID:2355)	+	increases	PubMed_10359014 /// PubMed_12594266 /// PubMed_12594266	/// ///
kin(p(HGNC:MAPK1))	r(EGID:23764)	-	decreases	PubMed_14704274	Hep G2 cell
kin(p(HGNC:MAPK1))	r(EGID:240)	+	increases	PubMed_20153347	J774A.1 cell
kin(p(HGNC:MAPK1))	r(EGID:25816)	-	decreases	PubMed_14704274	Hep G2 cell
kin(p(HGNC:MAPK1))	r(EGID:26471)	-	decreases	PubMed_14613582
kin(p(HGNC:MAPK1))	r(EGID:2710)	-	decreases	PubMed_14704274	Hep G2 cell
kin(p(HGNC:MAPK1))	r(EGID:2729)	+	increases	PubMed_15683710	lung_epithelial cell
kin(p(HGNC:MAPK1))	r(EGID:2805)	-	decreases	PubMed_14704274	Hep G2 cell
kin(p(HGNC:MAPK1))	r(EGID:2810)	-	decreases	PubMed_14704274	Hep G2 cell
kin(p(HGNC:MAPK1))	r(EGID:290)	+	increases	PubMed_12406907
kin(p(HGNC:MAPK1))	r(EGID:2919)	+	increases	PubMed_16735500	retinal pigment epithelial cell
kin(p(HGNC:MAPK1))	r(EGID:2920)	+	increases	PubMed_16735500	retinal pigment epithelial cell
kin(p(HGNC:MAPK1))	r(EGID:2921)	+	increases	PubMed_16735500	retinal pigment epithelial cell
kin(p(HGNC:MAPK1))	r(EGID:3037)	+	increases	PubMed_16735500	retinal pigment epithelial cell
kin(p(HGNC:MAPK1))	r(EGID:3067)	+	increases	PubMed_9722530 /// PubMed_9722530 /// PubMed_9722530 /// PubMed_9722530	AGS cell /// AGS cell /// AGS cell /// AGS cell
kin(p(HGNC:MAPK1))	r(EGID:3091)	+	increases	PubMed_12401798
kin(p(HGNC:MAPK1))	r(EGID:3159)	+	increases	PubMed_11390395
kin(p(HGNC:MAPK1))	r(EGID:3172)	-	decreases	PubMed_15337761
kin(p(HGNC:MAPK1))	r(EGID:3190)	+	increases	PubMed_16293596
kin(p(HGNC:MAPK1))	r(EGID:3290)	+	increases	PubMed_19251840	respiratory airway
kin(p(HGNC:MAPK1))	r(EGID:330)	+	increases	PubMed_16735500	retinal pigment epithelial cell
kin(p(HGNC:MAPK1))	r(EGID:3309)	+	increases	PubMed_11719466
kin(p(HGNC:MAPK1))	r(EGID:335)	+	increases	PubMed_14563824	Hep G2 cell
kin(p(HGNC:MAPK1))	r(EGID:3383)	ambiguous	decreases ||| increases	PubMed_14704274 ||| PubMed_16735500	Hep G2 cell ||| retinal pigment epithelial cell
kin(p(HGNC:MAPK1))	r(EGID:3399)	+	increases	PubMed_12847248
kin(p(HGNC:MAPK1))	r(EGID:3458)	+	increases	PubMed_10903731	natural killer cell
kin(p(HGNC:MAPK1))	r(EGID:348)	+	increases	PubMed_14585838
kin(p(HGNC:MAPK1))	r(EGID:3484)	-	decreases	PubMed_14704274	Hep G2 cell
kin(p(HGNC:MAPK1))	r(EGID:3490)	+	increases	PubMed_18267069	melanocyte
kin(p(HGNC:MAPK1))	r(EGID:354)	+	increases	PubMed_11410519
kin(p(HGNC:MAPK1))	r(EGID:3553)	+	increases	PubMed_14557365 /// PubMed_16735500	cardiovascular system_smooth muscle cell /// retinal pigment epithelial cell
kin(p(HGNC:MAPK1))	r(EGID:3569)	+	increases	PubMed_16735500	retinal pigment epithelial cell
kin(p(HGNC:MAPK1))	r(EGID:3576)	ambiguous	increases ||| decreases	PubMed_10817569 /// PubMed_11479233 /// PubMed_16735500 ||| PubMed_14704274	/// /// retinal pigment epithelial cell ||| Hep G2 cell
kin(p(HGNC:MAPK1))	r(EGID:358)	+	increases	PubMed_12600999
kin(p(HGNC:MAPK1))	r(EGID:3589)	+	increases	PubMed_16735500	retinal pigment epithelial cell
kin(p(HGNC:MAPK1))	r(EGID:3628)	-	decreases	PubMed_14704274	Hep G2 cell
kin(p(HGNC:MAPK1))	r(EGID:3638)	+	increases	PubMed_15731359	liver cancer
kin(p(HGNC:MAPK1))	r(EGID:3643)	-	decreases	PubMed_12554784
kin(p(HGNC:MAPK1))	r(EGID:3667)	-	decreases	PubMed_12554784
kin(p(HGNC:MAPK1))	r(EGID:3674)	+	increases	PubMed_15121870 /// PubMed_15121870	///
kin(p(HGNC:MAPK1))	r(EGID:374)	ambiguous	decreases ||| increases	PubMed_14704274 ||| PubMed_16735500	Hep G2 cell ||| retinal pigment epithelial cell
kin(p(HGNC:MAPK1))	r(EGID:384)	-	decreases	PubMed_14704274	Hep G2 cell
kin(p(HGNC:MAPK1))	r(EGID:3868)	+	increases	PubMed_17623675	keratinocyte
kin(p(HGNC:MAPK1))	r(EGID:3875)	-	decreases	PubMed_14704274	Hep G2 cell
kin(p(HGNC:MAPK1))	r(EGID:3912)	-	decreases	PubMed_14704274	Hep G2 cell
kin(p(HGNC:MAPK1))	r(EGID:3949)	-	decreases	PubMed_14704274	Hep G2 cell
kin(p(HGNC:MAPK1))	r(EGID:3956)	-	decreases	PubMed_14704274	Hep G2 cell
kin(p(HGNC:MAPK1))	r(EGID:3976)	-	decreases	PubMed_14704274	Hep G2 cell
kin(p(HGNC:MAPK1))	r(EGID:4092)	-	decreases	PubMed_11716483
kin(p(HGNC:MAPK1))	r(EGID:4129)	+	increases	PubMed_11956220
kin(p(HGNC:MAPK1))	r(EGID:4162)	-	decreases	PubMed_14704274	Hep G2 cell
kin(p(HGNC:MAPK1))	r(EGID:4170)	ambiguous	increases ||| decreases	PubMed_12963734 /// PubMed_9880563 /// PubMed_9880563 /// PubMed_9880563 ||| PubMed_14704274	/// /// /// ||| Hep G2 cell
kin(p(HGNC:MAPK1))	r(EGID:4223)	-	decreases	PubMed_15680482 /// PubMed_15680482	smooth muscle tissue /// smooth muscle tissue
kin(p(HGNC:MAPK1))	r(EGID:4312)	+	increases	PubMed_11297530 /// PubMed_11297530 /// PubMed_14764579 /// PubMed_16735500	/// /// respiratory system mucosa /// retinal pigment epithelial cell
kin(p(HGNC:MAPK1))	r(EGID:4318)	+	increases	PubMed_18424783	bronchus_Epithelial Cells
kin(p(HGNC:MAPK1))	r(EGID:4319)	+	increases	PubMed_16735500	retinal pigment epithelial cell
kin(p(HGNC:MAPK1))	r(EGID:4327)	+	increases	PubMed_14708598
kin(p(HGNC:MAPK1))	r(EGID:4586)	+	increases	PubMed_17615396 /// PubMed_19718656	lung /// respiratory system mucosa
kin(p(HGNC:MAPK1))	r(EGID:4622)	-	decreases	Other_Journal of Sports Science and Medicine (2002) 1, 103-114
kin(p(HGNC:MAPK1))	r(EGID:4629)	+	increases	PubMed_12623957
kin(p(HGNC:MAPK1))	r(EGID:467)	+	increases	PubMed_14723708 /// PubMed_15731359	/// liver cancer
kin(p(HGNC:MAPK1))	r(EGID:4783)	+	increases	PubMed_10082541
kin(p(HGNC:MAPK1))	r(EGID:4792)	+	increases	PubMed_16735500	retinal pigment epithelial cell
kin(p(HGNC:MAPK1))	r(EGID:4843)	ambiguous	decreases ||| increases	PubMed_11641777 ||| PubMed_9614146	|||
kin(p(HGNC:MAPK1))	r(EGID:4878)	+	increases	PubMed_14729955 /// PubMed_14729955 /// PubMed_14729955 /// PubMed_14729955	/// cardiac muscle tissue /// ///
kin(p(HGNC:MAPK1))	r(EGID:4973)	+	increases	PubMed_18817866	RAW 264.7 cell
kin(p(HGNC:MAPK1))	r(EGID:5055)	+	increases	PubMed_16735500	retinal pigment epithelial cell
kin(p(HGNC:MAPK1))	r(EGID:51703)	-	decreases	PubMed_14704274	Hep G2 cell
kin(p(HGNC:MAPK1))	r(EGID:5179)	+	increases	PubMed_11595755
kin(p(HGNC:MAPK1))	r(EGID:5328)	ambiguous	increases ||| decreases	PubMed_10347197 ||| PubMed_10347197	|||
kin(p(HGNC:MAPK1))	r(EGID:5329)	+	increases	PubMed_12670923
kin(p(HGNC:MAPK1))	r(EGID:54206)	+	increases	PubMed_15358516
kin(p(HGNC:MAPK1))	r(EGID:5468)	+	increases	PubMed_12457461	blood vessel smooth muscle
kin(p(HGNC:MAPK1))	r(EGID:55612)	+	increases	PubMed_16735500	retinal pigment epithelial cell
kin(p(HGNC:MAPK1))	r(EGID:55890)	-	decreases	PubMed_14704274	Hep G2 cell
kin(p(HGNC:MAPK1))	r(EGID:56729)	+	increases	PubMed_15578112	macrophage
kin(p(HGNC:MAPK1))	r(EGID:57018)	+	increases	PubMed_12807435 /// PubMed_12807435 /// PubMed_12807435	/// ///
kin(p(HGNC:MAPK1))	r(EGID:57211)	-	decreases	PubMed_14704274	Hep G2 cell
kin(p(HGNC:MAPK1))	r(EGID:5728)	-	decreases	PubMed_18794886	cancer
kin(p(HGNC:MAPK1))	r(EGID:5743)	+	increases	PubMed_12391274 /// PubMed_16735500 /// PubMed_18056868	NCI-H295R cell /// retinal pigment epithelial cell /// bronchoalveolar lavage fluid
kin(p(HGNC:MAPK1))	r(EGID:5744)	+	increases	PubMed_16735500	retinal pigment epithelial cell
kin(p(HGNC:MAPK1))	r(EGID:5806)	+	increases	PubMed_16735500	retinal pigment epithelial cell
kin(p(HGNC:MAPK1))	r(EGID:595)	+	increases	PubMed_10446041 /// PubMed_11230180 /// PubMed_11715015 /// PubMed_12907754	/// /// ///
kin(p(HGNC:MAPK1))	r(EGID:597)	+	increases	PubMed_12107051
kin(p(HGNC:MAPK1))	r(EGID:5972)	+	increases	PubMed_12600897
kin(p(HGNC:MAPK1))	r(EGID:598)	-	decreases	PubMed_14704274	Hep G2 cell
kin(p(HGNC:MAPK1))	r(EGID:6241)	+	increases	PubMed_11900481	brown fat cell
kin(p(HGNC:MAPK1))	r(EGID:6275)	+	increases	PubMed_12517790
kin(p(HGNC:MAPK1))	r(EGID:6281)	+	increases	PubMed_12163506
kin(p(HGNC:MAPK1))	r(EGID:633)	+	increases	PubMed_12538652 /// PubMed_12538652 /// PubMed_12538652	/// ///
kin(p(HGNC:MAPK1))	r(EGID:6347)	+	increases	PubMed_16735500	retinal pigment epithelial cell
kin(p(HGNC:MAPK1))	r(EGID:6446)	+	increases	PubMed_12649597
kin(p(HGNC:MAPK1))	r(EGID:650)	+	increases	PubMed_16735500	retinal pigment epithelial cell
kin(p(HGNC:MAPK1))	r(EGID:6513)	+	increases	PubMed_11279172
kin(p(HGNC:MAPK1))	r(EGID:6546)	+	increases	PubMed_12502566	cardiac muscle cell
kin(p(HGNC:MAPK1))	r(EGID:6575)	+	increases	PubMed_14584042	bone marrow
kin(p(HGNC:MAPK1))	r(EGID:65964)	+	increases	PubMed_11042189
kin(p(HGNC:MAPK1))	r(EGID:6648)	+	increases	PubMed_16735500	retinal pigment epithelial cell
kin(p(HGNC:MAPK1))	r(EGID:6659)	-	decreases	PubMed_14704274	Hep G2 cell
kin(p(HGNC:MAPK1))	r(EGID:669)	+	increases	PubMed_16735500	retinal pigment epithelial cell
kin(p(HGNC:MAPK1))	r(EGID:6711)	-	decreases	PubMed_14704274	Hep G2 cell
kin(p(HGNC:MAPK1))	r(EGID:6720)	+	increases	PubMed_12531699
kin(p(HGNC:MAPK1))	r(EGID:677)	-	decreases	PubMed_14704274	Hep G2 cell
kin(p(HGNC:MAPK1))	r(EGID:6770)	+	increases	PubMed_15666812 /// PubMed_15666812	adrenal gland ///
kin(p(HGNC:MAPK1))	r(EGID:6781)	+	increases	PubMed_16735500	retinal pigment epithelial cell
kin(p(HGNC:MAPK1))	r(EGID:7015)	+	increases	PubMed_14673140
kin(p(HGNC:MAPK1))	r(EGID:7052)	-	decreases	PubMed_12832399
kin(p(HGNC:MAPK1))	r(EGID:7056)	+	increases	PubMed_16735500	retinal pigment epithelial cell
kin(p(HGNC:MAPK1))	r(EGID:7057)	-	decreases	PubMed_16141331	endothelium
kin(p(HGNC:MAPK1))	r(EGID:7076)	ambiguous	decreases ||| increases	PubMed_14704274 ||| PubMed_16288749	Hep G2 cell ||| 3T3-L1 cell
kin(p(HGNC:MAPK1))	r(EGID:7128)	+	increases	PubMed_16735500	retinal pigment epithelial cell
kin(p(HGNC:MAPK1))	r(EGID:7291)	+	increases	PubMed_11323435	NIH-3T3 cell
kin(p(HGNC:MAPK1))	r(EGID:7306)	-	decreases	PubMed_12665551	melanocyte
kin(p(HGNC:MAPK1))	r(EGID:7402)	+	increases	PubMed_10359616
kin(p(HGNC:MAPK1))	r(EGID:7408)	-	decreases	PubMed_14704274	Hep G2 cell
kin(p(HGNC:MAPK1))	r(EGID:7422)	+	increases	PubMed_11507052 /// PubMed_15349119 /// PubMed_19454577 /// PubMed_20812001	/// gastrointestinal system cancer /// granulosa cell ///
kin(p(HGNC:MAPK1))	r(EGID:7436)	+	increases	PubMed_12973919 /// PubMed_12973919	///
kin(p(HGNC:MAPK1))	r(EGID:7846)	-	decreases	PubMed_14704274	Hep G2 cell
kin(p(HGNC:MAPK1))	r(EGID:7980)	+	increases	PubMed_16735500	retinal pigment epithelial cell
kin(p(HGNC:MAPK1))	r(EGID:80149)	+	increases	PubMed_16735500	retinal pigment epithelial cell
kin(p(HGNC:MAPK1))	r(EGID:8061)	+	increases	PubMed_12594266 /// PubMed_12839939 /// PubMed_16490785	/// /// respiratory epithelial cell
kin(p(HGNC:MAPK1))	r(EGID:857)	-	decreases	PubMed_10542274
kin(p(HGNC:MAPK1))	r(EGID:859)	+	increases	PubMed_10514527
kin(p(HGNC:MAPK1))	r(EGID:8651)	+	increases	PubMed_11971021
kin(p(HGNC:MAPK1))	r(EGID:87)	-	decreases	PubMed_14704274	Hep G2 cell
kin(p(HGNC:MAPK1))	r(EGID:8829)	+	increases	PubMed_12910515
kin(p(HGNC:MAPK1))	r(EGID:8837)	+	increases	PubMed_15282307
kin(p(HGNC:MAPK1))	r(EGID:8870)	-	decreases	PubMed_14704274	Hep G2 cell
kin(p(HGNC:MAPK1))	r(EGID:894)	+	increases	PubMed_11823472
kin(p(HGNC:MAPK1))	r(EGID:8942)	-	decreases	PubMed_14704274	Hep G2 cell
kin(p(HGNC:MAPK1))	r(EGID:9075)	-	decreases	PubMed_15569684	kidney
kin(p(HGNC:MAPK1))	r(EGID:9456)	+	increases	PubMed_16448751	neuron
kin(p(HGNC:MAPK1))	r(EGID:9592)	+	increases	PubMed_15731359	liver cancer
a(SCHEM:U0126)	r(EGID:10019)	-	decreases	PubMed_12941840	NCI-H157
a(SCHEM:U0126)	r(EGID:10043)	+	increases	PubMed_12941840	NCI-H157
a(SCHEM:U0126)	r(EGID:10202)	+	increases	PubMed_12941840	NCI-H157
a(SCHEM:U0126)	r(EGID:10252)	-	decreases	PubMed_12941840	NCI-H157
a(SCHEM:U0126)	r(EGID:1026)	-	decreases	PubMed_19797611	Hep G2 cell
a(SCHEM:U0126)	r(EGID:1027)	-	decreases	PubMed_19797611	Hep G2 cell
a(SCHEM:U0126)	r(EGID:1029)	-	decreases	PubMed_19797611	Hep G2 cell
a(SCHEM:U0126)	r(EGID:10297)	+	increases	PubMed_12941840	NCI-H157
a(SCHEM:U0126)	r(EGID:10370)	-	decreases	PubMed_19013137	PC-12 cell
a(SCHEM:U0126)	r(EGID:10420)	-	decreases	PubMed_12941840	NCI-H157
a(SCHEM:U0126)	r(EGID:10602)	-	decreases	PubMed_12941840	NCI-H157
a(SCHEM:U0126)	r(EGID:136)	-	decreases	PubMed_12941840	NCI-H157
a(SCHEM:U0126)	r(EGID:1408)	-	decreases	PubMed_12941840	NCI-H157
a(SCHEM:U0126)	r(EGID:1490)	-	decreases	PubMed_12941840	NCI-H157
a(SCHEM:U0126)	r(EGID:1545)	+	increases	PubMed_12941840	NCI-H157
a(SCHEM:U0126)	r(EGID:1555)	-	decreases	PubMed_19797611	Hep G2 cell
a(SCHEM:U0126)	r(EGID:1649)	+	increases	PubMed_12941840	NCI-H157
a(SCHEM:U0126)	r(EGID:1846)	-	decreases	PubMed_12941840	NCI-H157
a(SCHEM:U0126)	r(EGID:1848)	-	decreases	PubMed_12941840	NCI-H157
a(SCHEM:U0126)	r(EGID:1849)	-	decreases	PubMed_12941840	NCI-H157
a(SCHEM:U0126)	r(EGID:187)	+	increases	PubMed_12941840	NCI-H157
a(SCHEM:U0126)	r(EGID:1912)	-	decreases	PubMed_12941840	NCI-H157
a(SCHEM:U0126)	r(EGID:1952)	-	decreases	PubMed_12941840	NCI-H157
a(SCHEM:U0126)	r(EGID:1958)	-	decreases	PubMed_12947119 /// PubMed_16921106 /// PubMed_17967787	/// lung_fibroblast /// aorta_smooth muscle cell
a(SCHEM:U0126)	r(EGID:1969)	-	decreases	PubMed_12941840	NCI-H157
a(SCHEM:U0126)	r(EGID:2006)	+	increases	PubMed_12882762 /// PubMed_16473861 /// PubMed_16473861	lung_fibroblast /// lung_fibroblast /// lung_fibroblast
a(SCHEM:U0126)	r(EGID:2012)	-	decreases	PubMed_12941840	NCI-H157
a(SCHEM:U0126)	r(EGID:2069)	-	decreases	PubMed_12941840	NCI-H157
a(SCHEM:U0126)	r(EGID:2117)	-	decreases	PubMed_12941840	NCI-H157
a(SCHEM:U0126)	r(EGID:2119)	-	decreases	PubMed_12941840	NCI-H157
a(SCHEM:U0126)	r(EGID:22822)	-	decreases	PubMed_12941840	NCI-H157
a(SCHEM:U0126)	r(EGID:22875)	+	increases	PubMed_12941840	NCI-H157
a(SCHEM:U0126)	r(EGID:23180)	-	decreases	PubMed_12941840	NCI-H157
a(SCHEM:U0126)	r(EGID:2323)	+	increases	PubMed_12941840	NCI-H157
a(SCHEM:U0126)	r(EGID:2328)	+	increases	PubMed_12941840	NCI-H157
a(SCHEM:U0126)	r(EGID:2348)	+	increases	PubMed_12941840	NCI-H157
a(SCHEM:U0126)	r(EGID:23499)	-	decreases	PubMed_12941840	NCI-H157
a(SCHEM:U0126)	r(EGID:23510)	-	decreases	PubMed_12941840	NCI-H157
a(SCHEM:U0126)	r(EGID:2353)	-	decreases	PubMed_19013137	PC-12 cell
a(SCHEM:U0126)	r(EGID:23576)	+	increases	PubMed_12941840	NCI-H157
a(SCHEM:U0126)	r(EGID:23764)	-	decreases	PubMed_19013137	PC-12 cell
a(SCHEM:U0126)	r(EGID:2528)	-	decreases	PubMed_12941840	NCI-H157
a(SCHEM:U0126)	r(EGID:2531)	-	decreases	PubMed_12941840	NCI-H157
a(SCHEM:U0126)	r(EGID:25829)	-	decreases	PubMed_12941840	NCI-H157
a(SCHEM:U0126)	r(EGID:25907)	-	decreases	PubMed_12941840	NCI-H157
a(SCHEM:U0126)	r(EGID:2593)	+	increases	PubMed_12941840	NCI-H157
a(SCHEM:U0126)	r(EGID:2835)	-	decreases	PubMed_12941840	NCI-H157
a(SCHEM:U0126)	r(EGID:2920)	-	decreases	PubMed_12941840	NCI-H157
a(SCHEM:U0126)	r(EGID:3149)	-	decreases	PubMed_12941840	NCI-H157
a(SCHEM:U0126)	r(EGID:3326)	+	increases	PubMed_12941840	NCI-H157
a(SCHEM:U0126)	r(EGID:3383)	-	decreases	PubMed_12941840	NCI-H157
a(SCHEM:U0126)	r(EGID:3425)	+	increases	PubMed_12941840	NCI-H157
a(SCHEM:U0126)	r(EGID:354)	+	increases	PubMed_12941840	NCI-H157
a(SCHEM:U0126)	r(EGID:3549)	+	increases	PubMed_12941840	NCI-H157
a(SCHEM:U0126)	r(EGID:3556)	-	decreases	PubMed_12941840	NCI-H157
a(SCHEM:U0126)	r(EGID:3576)	-	decreases	PubMed_12941840	NCI-H157
a(SCHEM:U0126)	r(EGID:362)	-	decreases	PubMed_10722758	lung_epithelial cell
a(SCHEM:U0126)	r(EGID:363)	+	increases	PubMed_12941840	NCI-H157
a(SCHEM:U0126)	r(EGID:3673)	-	decreases	PubMed_12657625	HCT 116 cell
a(SCHEM:U0126)	r(EGID:3678)	-	decreases	PubMed_12941840	NCI-H157
a(SCHEM:U0126)	r(EGID:3693)	-	decreases	PubMed_12941840	NCI-H157
a(SCHEM:U0126)	r(EGID:3727)	+	increases	PubMed_12941840	NCI-H157
a(SCHEM:U0126)	r(EGID:3801)	-	decreases	PubMed_12941840	NCI-H157
a(SCHEM:U0126)	r(EGID:3949)	-	decreases	PubMed_12947119
a(SCHEM:U0126)	r(EGID:3996)	-	decreases	PubMed_12941840	NCI-H157
a(SCHEM:U0126)	r(EGID:40)	-	decreases	PubMed_12941840	NCI-H157
a(SCHEM:U0126)	r(EGID:407006)	-	decreases	PubMed_20299489	K-562 cell
a(SCHEM:U0126)	r(EGID:407007)	-	decreases	PubMed_20299489	K-562 cell
a(SCHEM:U0126)	r(EGID:407040)	-	decreases	PubMed_20299489	K-562 cell
a(SCHEM:U0126)	r(EGID:4170)	-	decreases	PubMed_12941840	NCI-H157
a(SCHEM:U0126)	r(EGID:4312)	-	decreases	PubMed_11297530 /// PubMed_19337515	HT-1080 cell_fibrosarcoma /// BEAS-2B cell
a(SCHEM:U0126)	r(EGID:4583)	-	decreases	PubMed_12941840	NCI-H157
a(SCHEM:U0126)	r(EGID:4616)	+	increases	PubMed_12941840	NCI-H157
a(SCHEM:U0126)	r(EGID:4647)	+	increases	PubMed_12941840	NCI-H157
a(SCHEM:U0126)	r(EGID:467)	-	decreases	PubMed_19013137	PC-12 cell
a(SCHEM:U0126)	r(EGID:4772)	-	decreases	PubMed_12941840	NCI-H157
a(SCHEM:U0126)	r(EGID:4826)	-	decreases	PubMed_12941840	NCI-H157
a(SCHEM:U0126)	r(EGID:5168)	+	increases	PubMed_12941840	NCI-H157
a(SCHEM:U0126)	r(EGID:5328)	-	decreases	PubMed_12941840	NCI-H157
a(SCHEM:U0126)	r(EGID:5329)	-	decreases	PubMed_12941840	NCI-H157
a(SCHEM:U0126)	r(EGID:54206)	-	decreases	PubMed_12226756	breast
a(SCHEM:U0126)	r(EGID:54658)	-	decreases	PubMed_19797611	Hep G2 cell
a(SCHEM:U0126)	r(EGID:5549)	+	increases	PubMed_12941840	NCI-H157
a(SCHEM:U0126)	r(EGID:5568)	+	increases	PubMed_12941840	NCI-H157
a(SCHEM:U0126)	r(EGID:5617)	-	decreases	PubMed_12941840	NCI-H157
a(SCHEM:U0126)	r(EGID:57007)	+	increases	PubMed_12941840	NCI-H157
a(SCHEM:U0126)	r(EGID:57113)	-	decreases	PubMed_12941840	NCI-H157
a(SCHEM:U0126)	r(EGID:5743)	-	decreases	PubMed_15525649	intestine_epithelial cell
a(SCHEM:U0126)	r(EGID:57476)	-	decreases	PubMed_12941840	NCI-H157
a(SCHEM:U0126)	r(EGID:57538)	+	increases	PubMed_12941840	NCI-H157
a(SCHEM:U0126)	r(EGID:5782)	-	decreases	PubMed_12941840	NCI-H157
a(SCHEM:U0126)	r(EGID:5880)	-	decreases	PubMed_12941840	NCI-H157
a(SCHEM:U0126)	r(EGID:5888)	-	decreases	PubMed_19671683 /// PubMed_19671683	NCI-H1703 cell_non-small cell lung carcinoma /// NCI-H520 cell_non-small cell lung carcinoma
a(SCHEM:U0126)	r(EGID:595)	-	decreases	PubMed_12941840	NCI-H157
a(SCHEM:U0126)	r(EGID:5972)	-	decreases	PubMed_12941840	NCI-H157
a(SCHEM:U0126)	r(EGID:6324)	-	decreases	PubMed_12941840	NCI-H157
a(SCHEM:U0126)	r(EGID:64063)	+	increases	PubMed_12941840	NCI-H157
a(SCHEM:U0126)	r(EGID:6447)	-	decreases	PubMed_12941840	NCI-H157
a(SCHEM:U0126)	r(EGID:6461)	-	decreases	PubMed_12941840	NCI-H157
a(SCHEM:U0126)	r(EGID:6515)	-	decreases	PubMed_12941840	NCI-H157
a(SCHEM:U0126)	r(EGID:6546)	-	decreases	PubMed_12502566	cardiac muscle cell
a(SCHEM:U0126)	r(EGID:6657)	+	increases	PubMed_12941840	NCI-H157
a(SCHEM:U0126)	r(EGID:6840)	-	decreases	PubMed_12941840	NCI-H157
a(SCHEM:U0126)	r(EGID:6891)	+	increases	PubMed_12941840	NCI-H157
a(SCHEM:U0126)	r(EGID:6901)	-	decreases	PubMed_12941840	NCI-H157
a(SCHEM:U0126)	r(EGID:7026)	-	decreases	PubMed_12525252
a(SCHEM:U0126)	r(EGID:7048)	-	decreases	PubMed_12941840	NCI-H157
a(SCHEM:U0126)	r(EGID:7071)	-	decreases	PubMed_19013137	PC-12 cell
a(SCHEM:U0126)	r(EGID:7185)	-	decreases	PubMed_12941840	NCI-H157
a(SCHEM:U0126)	r(EGID:7289)	+	increases	PubMed_12941840	NCI-H157
a(SCHEM:U0126)	r(EGID:7369)	+	increases	PubMed_12941840	NCI-H157
a(SCHEM:U0126)	r(EGID:7546)	+	increases	PubMed_12941840	NCI-H157
a(SCHEM:U0126)	r(EGID:80271)	+	increases	PubMed_12941840	NCI-H157
a(SCHEM:U0126)	r(EGID:8061)	-	decreases	PubMed_12941840 /// PubMed_17082637 /// PubMed_17082637	NCI-H157 /// MEF cell line /// A549 cell
a(SCHEM:U0126)	r(EGID:81628)	+	increases	PubMed_12941840	NCI-H157
a(SCHEM:U0126)	r(EGID:8178)	-	decreases	PubMed_12941840	NCI-H157
a(SCHEM:U0126)	r(EGID:8409)	-	decreases	PubMed_17761951	LNCAP cell
a(SCHEM:U0126)	r(EGID:8642)	-	decreases	PubMed_12941840	NCI-H157
a(SCHEM:U0126)	r(EGID:8848)	-	decreases	PubMed_12941840	NCI-H157
a(SCHEM:U0126)	r(EGID:8870)	-	decreases	PubMed_12941840	NCI-H157
a(SCHEM:U0126)	r(EGID:89795)	-	decreases	PubMed_12941840	NCI-H157
a(SCHEM:U0126)	r(EGID:901)	+	increases	PubMed_12941840	NCI-H157
a(SCHEM:U0126)	r(EGID:9084)	+	increases	PubMed_12941840	NCI-H157
a(SCHEM:U0126)	r(EGID:9150)	+	increases	PubMed_12941840	NCI-H157
a(SCHEM:U0126)	r(EGID:9180)	-	decreases	PubMed_12941840	NCI-H157
a(SCHEM:U0126)	r(EGID:9181)	-	decreases	PubMed_12941840	NCI-H157
a(SCHEM:U0126)	r(EGID:9263)	-	decreases	PubMed_12941840	NCI-H157
a(SCHEM:U0126)	r(EGID:9314)	-	decreases	PubMed_19013137	PC-12 cell
a(SCHEM:U0126)	r(EGID:9315)	+	increases	PubMed_12941840	NCI-H157
a(SCHEM:U0126)	r(EGID:9429)	+	increases	PubMed_12941840	NCI-H157
a(SCHEM:U0126)	r(EGID:9521)	-	decreases	PubMed_12941840	NCI-H157
a(SCHEM:U0126)	r(EGID:9592)	-	decreases	PubMed_12941840	NCI-H157
a(SCHEM:U0126)	r(EGID:9679)	+	increases	PubMed_12941840	NCI-H157
a(SCHEM:U0126)	r(EGID:9681)	+	increases	PubMed_12941840	NCI-H157
a(SCHEM:U0126)	r(EGID:9945)	-	decreases	PubMed_12941840	NCI-H157
a(SCHEM:"PD 98,059")	r(EGID:132)	-	decreases	PubMed_12729803	lymphocyte
a(SCHEM:"PD 98,059")	r(EGID:1437)	-	decreases	PubMed_10903772	lung_bronchial epithelial cell
a(SCHEM:"PD 98,059")	r(EGID:1508)	-	decreases	PubMed_16374521	lung
a(SCHEM:"PD 98,059")	r(EGID:1839)	-	decreases	PubMed_11159045
a(SCHEM:"PD 98,059")	r(EGID:1958)	-	decreases	PubMed_16921106 /// PubMed_17967787	lung_fibroblast /// aorta_smooth muscle cell
a(SCHEM:"PD 98,059")	r(EGID:2006)	+	increases	PubMed_11557580 /// PubMed_11889128	lung_fibroblast /// lung_fibroblast
a(SCHEM:"PD 98,059")	r(EGID:2028)	-	decreases	PubMed_12915695
a(SCHEM:"PD 98,059")	r(EGID:2069)	-	decreases	PubMed_18948081	prostate cancer
a(SCHEM:"PD 98,059")	r(EGID:240)	-	decreases	PubMed_20153347	J774A.1 cell
a(SCHEM:"PD 98,059")	r(EGID:2919)	-	decreases	PubMed_16374521	lung
a(SCHEM:"PD 98,059")	r(EGID:305843)	+	increases	PubMed_10537159	kidney
a(SCHEM:"PD 98,059")	r(EGID:345)	+	increases	PubMed_10551874	Hep G2 cell
a(SCHEM:"PD 98,059")	r(EGID:3553)	-	decreases	PubMed_17404266	RAW 264.7 cell
a(SCHEM:"PD 98,059")	r(EGID:3569)	-	decreases	PubMed_10925306 /// PubMed_10925306 /// PubMed_10925306 /// PubMed_11692108	lung_fibroblast /// lung_fibroblast /// lung_fibroblast /// lung_bronchial epithelial cell
a(SCHEM:"PD 98,059")	r(EGID:3576)	-	decreases	PubMed_11692108 /// PubMed_14553834 /// PubMed_14553834 /// PubMed_17220369	lung_bronchial epithelial cell /// macrophage_THP-1 cell /// macrophage_THP-1 cell ///
a(SCHEM:"PD 98,059")	r(EGID:362)	-	decreases	PubMed_10722758	lung_epithelial cell
a(SCHEM:"PD 98,059")	r(EGID:3673)	-	decreases	PubMed_12657625	HCT 116 cell
a(SCHEM:"PD 98,059")	r(EGID:4254)	-	decreases	PubMed_14563684	lung_fibroblast
a(SCHEM:"PD 98,059")	r(EGID:4312)	-	decreases	PubMed_11297530 /// PubMed_11297530 /// PubMed_11297530 /// PubMed_11297530 /// PubMed_14764579 /// PubMed_19337515	HT-1080 cell_fibrosarcoma /// HT-1080 cell_fibrosarcoma /// HT-1080 cell_fibrosarcoma /// HT-1080 cell_fibrosarcoma /// respiratory system mucosa /// BEAS-2B cell
a(SCHEM:"PD 98,059")	r(EGID:4313)	-	decreases	PubMed_16374521	lung
a(SCHEM:"PD 98,059")	r(EGID:4318)	-	decreases	PubMed_16374521	lung
a(SCHEM:"PD 98,059")	r(EGID:4321)	-	decreases	PubMed_16374521	lung
a(SCHEM:"PD 98,059")	r(EGID:4323)	-	decreases	PubMed_16374521	lung
a(SCHEM:"PD 98,059")	r(EGID:4586)	-	decreases	PubMed_15531749 /// PubMed_15531749	NCI-H292 cell /// NCI-H292 cell
a(SCHEM:"PD 98,059")	r(EGID:4654)	+	increases	PubMed_11279003
a(SCHEM:"PD 98,059")	r(EGID:4656)	+	increases	PubMed_11279003
a(SCHEM:"PD 98,059")	r(EGID:5154)	+	increases	PubMed_16951379	lung_fibroblast
a(SCHEM:"PD 98,059")	r(EGID:5265)	-	decreases	PubMed_16374521	lung
a(SCHEM:"PD 98,059")	r(EGID:56034)	+	increases	PubMed_16951379	lung_fibroblast
a(SCHEM:"PD 98,059")	r(EGID:595)	-	decreases	PubMed_11230180 /// PubMed_9756915	///
a(SCHEM:"PD 98,059")	r(EGID:627)	-	decreases	PubMed_9892356	cerebellum_primary cultured cell
a(SCHEM:"PD 98,059")	r(EGID:6348)	-	decreases	PubMed_16374521	lung
a(SCHEM:"PD 98,059")	r(EGID:6351)	-	decreases	PubMed_16374521 /// PubMed_20952681	lung /// THP-1 cell
a(SCHEM:"PD 98,059")	r(EGID:6352)	-	decreases	PubMed_16374521	lung
a(SCHEM:"PD 98,059")	r(EGID:7185)	-	decreases	PubMed_17008592	HUVEC cell line
a(SCHEM:"PD 98,059")	r(EGID:8013)	-	decreases	PubMed_16945922 /// PubMed_16945922	aorta_smooth muscle cell /// aorta_smooth muscle cell
a(SCHEM:"PD 98,059")	r(EGID:8061)	-	decreases	PubMed_16484683 /// PubMed_17082637 /// PubMed_17082637	1HAEo- cell /// MEF cell line /// A549 cell
a(SCHEM:"PD 98,059")	r(EGID:8513)	+	increases	PubMed_10092305 /// PubMed_10092305	///
p(HGNC:KRAS,sub(G,12,V))	r(EGID:100504486)	+	increases	PubMed_16959882	intestine
p(HGNC:KRAS,sub(G,12,V))	r(EGID:10403)	+	increases	PubMed_16959882	intestine
p(HGNC:KRAS,sub(G,12,V))	r(EGID:10451)	+	increases	PubMed_16959882	intestine
p(HGNC:KRAS,sub(G,12,V))	r(EGID:10580)	+	increases	PubMed_17018633
p(HGNC:KRAS,sub(G,12,V))	r(EGID:10875)	+	increases	PubMed_16959882	intestine
p(HGNC:KRAS,sub(G,12,V))	r(EGID:10955)	+	increases	PubMed_16959882	intestine
p(HGNC:KRAS,sub(G,12,V))	r(EGID:11009)	+	increases	PubMed_17018633
p(HGNC:KRAS,sub(G,12,V))	r(EGID:11188)	+	increases	PubMed_16959882	intestine
p(HGNC:KRAS,sub(G,12,V))	r(EGID:11216)	+	increases	PubMed_16959882	intestine
p(HGNC:KRAS,sub(G,12,V))	r(EGID:115294)	+	increases	PubMed_16959882	intestine
p(HGNC:KRAS,sub(G,12,V))	r(EGID:126006)	+	increases	PubMed_16959882	intestine
p(HGNC:KRAS,sub(G,12,V))	r(EGID:1356)	+	increases	PubMed_16959882	intestine
p(HGNC:KRAS,sub(G,12,V))	r(EGID:1410)	+	increases	PubMed_16959882	intestine
p(HGNC:KRAS,sub(G,12,V))	r(EGID:1437)	+	increases	PubMed_17018633
p(HGNC:KRAS,sub(G,12,V))	r(EGID:1486)	+	increases	PubMed_16959882	intestine
p(HGNC:KRAS,sub(G,12,V))	r(EGID:1490)	+	increases	PubMed_16959882	intestine
p(HGNC:KRAS,sub(G,12,V))	r(EGID:1674)	+	increases	PubMed_16959882	intestine
p(HGNC:KRAS,sub(G,12,V))	r(EGID:1810)	+	increases	PubMed_16959882	intestine
p(HGNC:KRAS,sub(G,12,V))	r(EGID:1870)	+	increases	PubMed_17018633
p(HGNC:KRAS,sub(G,12,V))	r(EGID:1956)	+	increases	PubMed_17018633
p(HGNC:KRAS,sub(G,12,V))	r(EGID:203522)	+	increases	PubMed_16959882	intestine
p(HGNC:KRAS,sub(G,12,V))	r(EGID:205327)	+	increases	PubMed_16959882	intestine
p(HGNC:KRAS,sub(G,12,V))	r(EGID:208)	+	increases	PubMed_17018633
p(HGNC:KRAS,sub(G,12,V))	r(EGID:2202)	+	increases	PubMed_17018633
p(HGNC:KRAS,sub(G,12,V))	r(EGID:23036)	+	increases	PubMed_16959882	intestine
p(HGNC:KRAS,sub(G,12,V))	r(EGID:23443)	+	increases	PubMed_16959882	intestine
p(HGNC:KRAS,sub(G,12,V))	r(EGID:23560)	+	increases	PubMed_16959882	intestine
p(HGNC:KRAS,sub(G,12,V))	r(EGID:23595)	+	increases	PubMed_16959882	intestine
p(HGNC:KRAS,sub(G,12,V))	r(EGID:255758)	+	increases	PubMed_16959882	intestine
p(HGNC:KRAS,sub(G,12,V))	r(EGID:25946)	+	increases	PubMed_17018633
p(HGNC:KRAS,sub(G,12,V))	r(EGID:26036)	+	increases	PubMed_17018633
p(HGNC:KRAS,sub(G,12,V))	r(EGID:26091)	+	increases	PubMed_17018633
p(HGNC:KRAS,sub(G,12,V))	r(EGID:26608)	+	increases	PubMed_17018633
p(HGNC:KRAS,sub(G,12,V))	r(EGID:27181)	+	increases	PubMed_17018633
p(HGNC:KRAS,sub(G,12,V))	r(EGID:27292)	+	increases	PubMed_16959882	intestine
p(HGNC:KRAS,sub(G,12,V))	r(EGID:27330)	+	increases	PubMed_16959882	intestine
p(HGNC:KRAS,sub(G,12,V))	r(EGID:2787)	+	increases	PubMed_16959882	intestine
p(HGNC:KRAS,sub(G,12,V))	r(EGID:28232)	+	increases	PubMed_16959882	intestine
p(HGNC:KRAS,sub(G,12,V))	r(EGID:285761)	+	increases	PubMed_17018633
p(HGNC:KRAS,sub(G,12,V))	r(EGID:2909)	+	increases	PubMed_17018633
p(HGNC:KRAS,sub(G,12,V))	r(EGID:2932)	+	increases	PubMed_17018633
p(HGNC:KRAS,sub(G,12,V))	r(EGID:29966)	+	increases	PubMed_16959882	intestine
p(HGNC:KRAS,sub(G,12,V))	r(EGID:30061)	+	increases	PubMed_16959882	intestine
p(HGNC:KRAS,sub(G,12,V))	r(EGID:3176)	+	increases	PubMed_16959882	intestine
p(HGNC:KRAS,sub(G,12,V))	r(EGID:320312)	+	increases	PubMed_16959882	intestine
p(HGNC:KRAS,sub(G,12,V))	r(EGID:340481)	+	increases	PubMed_16959882	intestine
p(HGNC:KRAS,sub(G,12,V))	r(EGID:345757)	+	increases	PubMed_16959882	intestine
p(HGNC:KRAS,sub(G,12,V))	r(EGID:3479)	+	increases	PubMed_19738076	lung_bronchial epithelial cell
p(HGNC:KRAS,sub(G,12,V))	r(EGID:3481)	+	increases	PubMed_19738076	lung_bronchial epithelial cell
p(HGNC:KRAS,sub(G,12,V))	r(EGID:3574)	+	increases	PubMed_16959882	intestine
p(HGNC:KRAS,sub(G,12,V))	r(EGID:360023)	+	increases	PubMed_16959882	intestine
p(HGNC:KRAS,sub(G,12,V))	r(EGID:3651)	+	increases	PubMed_16959882	intestine
p(HGNC:KRAS,sub(G,12,V))	r(EGID:374393)	+	increases	PubMed_17018633
p(HGNC:KRAS,sub(G,12,V))	r(EGID:3799)	+	increases	PubMed_16959882	intestine
p(HGNC:KRAS,sub(G,12,V))	r(EGID:3839)	+	increases	PubMed_16959882	intestine
p(HGNC:KRAS,sub(G,12,V))	r(EGID:387509)	+	increases	PubMed_17018633
p(HGNC:KRAS,sub(G,12,V))	r(EGID:401541)	+	increases	PubMed_16959882	intestine
p(HGNC:KRAS,sub(G,12,V))	r(EGID:4050)	+	increases	PubMed_17018633
p(HGNC:KRAS,sub(G,12,V))	r(EGID:4193)	+	increases	PubMed_16959882	intestine
p(HGNC:KRAS,sub(G,12,V))	r(EGID:4208)	+	increases	PubMed_16959882	intestine
p(HGNC:KRAS,sub(G,12,V))	r(EGID:4212)	+	increases	PubMed_16959882	intestine
p(HGNC:KRAS,sub(G,12,V))	r(EGID:4215)	+	increases	PubMed_17018633
p(HGNC:KRAS,sub(G,12,V))	r(EGID:4586)	+	increases	PubMed_17018633
p(HGNC:KRAS,sub(G,12,V))	r(EGID:4644)	+	increases	PubMed_16959882	intestine
p(HGNC:KRAS,sub(G,12,V))	r(EGID:480)	+	increases	PubMed_17018633
p(HGNC:KRAS,sub(G,12,V))	r(EGID:4969)	+	increases	PubMed_16959882	intestine
p(HGNC:KRAS,sub(G,12,V))	r(EGID:5028)	+	increases	PubMed_16959882	intestine
p(HGNC:KRAS,sub(G,12,V))	r(EGID:51095)	+	increases	PubMed_16959882	intestine
p(HGNC:KRAS,sub(G,12,V))	r(EGID:51101)	+	increases	PubMed_16959882	intestine
p(HGNC:KRAS,sub(G,12,V))	r(EGID:5111)	+	increases	PubMed_16679305
p(HGNC:KRAS,sub(G,12,V))	r(EGID:5139)	+	increases	PubMed_17018633
p(HGNC:KRAS,sub(G,12,V))	r(EGID:51442)	+	increases	PubMed_17018633
p(HGNC:KRAS,sub(G,12,V))	r(EGID:5305)	+	increases	PubMed_16959882	intestine
p(HGNC:KRAS,sub(G,12,V))	r(EGID:5334)	+	increases	PubMed_17018633
p(HGNC:KRAS,sub(G,12,V))	r(EGID:54107)	+	increases	PubMed_16959882	intestine
p(HGNC:KRAS,sub(G,12,V))	r(EGID:54495)	+	increases	PubMed_16959882	intestine
p(HGNC:KRAS,sub(G,12,V))	r(EGID:5471)	+	increases	PubMed_17018633
p(HGNC:KRAS,sub(G,12,V))	r(EGID:55015)	+	increases	PubMed_16959882	intestine
p(HGNC:KRAS,sub(G,12,V))	r(EGID:55089)	+	increases	PubMed_16959882	intestine
p(HGNC:KRAS,sub(G,12,V))	r(EGID:55101)	+	increases	PubMed_16959882	intestine
p(HGNC:KRAS,sub(G,12,V))	r(EGID:55183)	+	increases	PubMed_16959882	intestine
p(HGNC:KRAS,sub(G,12,V))	r(EGID:55217)	+	increases	PubMed_16959882	intestine
p(HGNC:KRAS,sub(G,12,V))	r(EGID:5569)	+	increases	PubMed_16959882	intestine
p(HGNC:KRAS,sub(G,12,V))	r(EGID:55740)	+	increases	PubMed_16959882	intestine
p(HGNC:KRAS,sub(G,12,V))	r(EGID:55791)	+	increases	PubMed_16959882	intestine
p(HGNC:KRAS,sub(G,12,V))	r(EGID:55914)	+	increases	PubMed_17018633
p(HGNC:KRAS,sub(G,12,V))	r(EGID:57223)	+	increases	PubMed_16959882	intestine
p(HGNC:KRAS,sub(G,12,V))	r(EGID:5903)	+	increases	PubMed_16959882	intestine
p(HGNC:KRAS,sub(G,12,V))	r(EGID:6093)	+	increases	PubMed_16959882	intestine
p(HGNC:KRAS,sub(G,12,V))	r(EGID:6102)	+	increases	PubMed_16959882	intestine
p(HGNC:KRAS,sub(G,12,V))	r(EGID:6210)	+	increases	PubMed_16959882	intestine
p(HGNC:KRAS,sub(G,12,V))	r(EGID:6304)	+	increases	PubMed_16959882	intestine
p(HGNC:KRAS,sub(G,12,V))	r(EGID:6387)	+	increases	PubMed_17018633
p(HGNC:KRAS,sub(G,12,V))	r(EGID:6451)	+	increases	PubMed_16959882	intestine
p(HGNC:KRAS,sub(G,12,V))	r(EGID:67861)	+	increases	PubMed_16959882	intestine
p(HGNC:KRAS,sub(G,12,V))	r(EGID:6868)	+	increases	PubMed_16959882	intestine
p(HGNC:KRAS,sub(G,12,V))	r(EGID:69277)	+	increases	PubMed_16959882	intestine
p(HGNC:KRAS,sub(G,12,V))	r(EGID:6940)	+	increases	PubMed_17018633
p(HGNC:KRAS,sub(G,12,V))	r(EGID:6990)	+	increases	PubMed_16959882	intestine
p(HGNC:KRAS,sub(G,12,V))	r(EGID:7070)	+	increases	PubMed_17018633
p(HGNC:KRAS,sub(G,12,V))	r(EGID:71512)	+	increases	PubMed_16959882	intestine
p(HGNC:KRAS,sub(G,12,V))	r(EGID:72)	+	increases	PubMed_16959882	intestine
p(HGNC:KRAS,sub(G,12,V))	r(EGID:72810)	+	increases	PubMed_16959882	intestine
p(HGNC:KRAS,sub(G,12,V))	r(EGID:7325)	+	increases	PubMed_17018633
p(HGNC:KRAS,sub(G,12,V))	r(EGID:7336)	+	increases	PubMed_16959882	intestine
p(HGNC:KRAS,sub(G,12,V))	r(EGID:7750)	+	increases	PubMed_17018633
p(HGNC:KRAS,sub(G,12,V))	r(EGID:79634)	+	increases	PubMed_16959882	intestine
p(HGNC:KRAS,sub(G,12,V))	r(EGID:81035)	+	increases	PubMed_16959882	intestine
p(HGNC:KRAS,sub(G,12,V))	r(EGID:8263)	+	increases	PubMed_16959882	intestine
p(HGNC:KRAS,sub(G,12,V))	r(EGID:84188)	+	increases	PubMed_16959882	intestine
p(HGNC:KRAS,sub(G,12,V))	r(EGID:84651)	+	increases	PubMed_17018633
p(HGNC:KRAS,sub(G,12,V))	r(EGID:8471)	+	increases	PubMed_17018633
p(HGNC:KRAS,sub(G,12,V))	r(EGID:8490)	+	increases	PubMed_16959882	intestine
p(HGNC:KRAS,sub(G,12,V))	r(EGID:8516)	+	increases	PubMed_17018633
p(HGNC:KRAS,sub(G,12,V))	r(EGID:85409)	+	increases	PubMed_16959882	intestine
p(HGNC:KRAS,sub(G,12,V))	r(EGID:8609)	+	increases	PubMed_16959882	intestine
p(HGNC:KRAS,sub(G,12,V))	r(EGID:891)	+	increases	PubMed_16679305
p(HGNC:KRAS,sub(G,12,V))	r(EGID:9135)	+	increases	PubMed_16959882	intestine
p(HGNC:KRAS,sub(G,12,V))	r(EGID:9173)	+	increases	PubMed_16959882	intestine
p(HGNC:KRAS,sub(G,12,V))	r(EGID:9180)	+	increases	PubMed_16959882	intestine
p(HGNC:KRAS,sub(G,12,V))	r(EGID:9223)	+	increases	PubMed_17018633
p(HGNC:KRAS,sub(G,12,V))	r(EGID:9241)	+	increases	PubMed_17018633
p(HGNC:KRAS,sub(G,12,V))	r(EGID:9255)	+	increases	PubMed_17018633
p(HGNC:KRAS,sub(G,12,V))	r(EGID:94241)	+	increases	PubMed_16959882	intestine
p(HGNC:KRAS,sub(G,12,V))	r(EGID:943)	+	increases	PubMed_17018633
p(HGNC:KRAS,sub(G,12,V))	r(EGID:9541)	+	increases	PubMed_16959882	intestine
p(HGNC:KRAS,sub(G,12,V))	r(EGID:9702)	+	increases	PubMed_16959882	intestine
p(HGNC:KRAS,sub(G,12,V))	r(EGID:9910)	+	increases	PubMed_16959882	intestine
p(HGNC:KRAS,sub(G,12,V))	r(EGID:9975)	+	increases	PubMed_16959882	intestine
p(HGNC:KRAS,sub(G,12,V))	r(EGID:9984)	+	increases	PubMed_16959882	intestine
p(HGNC:KRAS,sub(G,12,V))	r(MGI:Hnrnpdl1)	+	increases	PubMed_16959882	intestine
a(SCHEM:PD0325901)	r(EGID:10019)	-	decreases	PubMed_19251651	carcinoma
a(SCHEM:PD0325901)	r(EGID:10253)	-	decreases	PubMed_19251651	carcinoma
a(SCHEM:PD0325901)	r(EGID:10622)	-	decreases	PubMed_19251651	carcinoma
a(SCHEM:PD0325901)	r(EGID:10849)	-	decreases	PubMed_19251651	carcinoma
a(SCHEM:PD0325901)	r(EGID:10865)	-	decreases	PubMed_19251651	carcinoma
a(SCHEM:PD0325901)	r(EGID:10885)	-	decreases	PubMed_19251651	carcinoma
a(SCHEM:PD0325901)	r(EGID:11036)	+	increases	PubMed_19251651	carcinoma
a(SCHEM:PD0325901)	r(EGID:1263)	-	decreases	PubMed_19251651	carcinoma
a(SCHEM:PD0325901)	r(EGID:1846)	-	decreases	PubMed_19251651	carcinoma
a(SCHEM:PD0325901)	r(EGID:1848)	-	decreases	PubMed_19251651	carcinoma
a(SCHEM:PD0325901)	r(EGID:1958)	-	decreases	PubMed_19251651	carcinoma
a(SCHEM:PD0325901)	r(EGID:200734)	-	decreases	PubMed_19251651	carcinoma
a(SCHEM:PD0325901)	r(EGID:2115)	-	decreases	PubMed_19251651	carcinoma
a(SCHEM:PD0325901)	r(EGID:2118)	-	decreases	PubMed_19251651	carcinoma
a(SCHEM:PD0325901)	r(EGID:2119)	-	decreases	PubMed_19251651	carcinoma
a(SCHEM:PD0325901)	r(EGID:22856)	-	decreases	PubMed_19251651	carcinoma
a(SCHEM:PD0325901)	r(EGID:23212)	-	decreases	PubMed_19251651	carcinoma
a(SCHEM:PD0325901)	r(EGID:2353)	-	decreases	PubMed_19251651	carcinoma
a(SCHEM:PD0325901)	r(EGID:23560)	-	decreases	PubMed_19251651	carcinoma
a(SCHEM:PD0325901)	r(EGID:23764)	-	decreases	PubMed_19251651	carcinoma
a(SCHEM:PD0325901)	r(EGID:26354)	-	decreases	PubMed_19251651	carcinoma
a(SCHEM:PD0325901)	r(EGID:2827)	-	decreases	PubMed_19251651	carcinoma
a(SCHEM:PD0325901)	r(EGID:3371)	-	decreases	PubMed_19251651	carcinoma
a(SCHEM:PD0325901)	r(EGID:3576)	-	decreases	PubMed_19251651	carcinoma
a(SCHEM:PD0325901)	r(EGID:3812)	+	increases	PubMed_19251651	carcinoma
a(SCHEM:PD0325901)	r(EGID:3976)	-	decreases	PubMed_19251651	carcinoma
a(SCHEM:PD0325901)	r(EGID:4609)	-	decreases	PubMed_19251651	carcinoma
a(SCHEM:PD0325901)	r(EGID:50628)	-	decreases	PubMed_19251651	carcinoma
a(SCHEM:PD0325901)	r(EGID:51330)	-	decreases	PubMed_19251651	carcinoma
a(SCHEM:PD0325901)	r(EGID:51491)	-	decreases	PubMed_19251651	carcinoma
a(SCHEM:PD0325901)	r(EGID:5471)	-	decreases	PubMed_19251651	carcinoma
a(SCHEM:PD0325901)	r(EGID:54768)	+	increases	PubMed_19251651	carcinoma
a(SCHEM:PD0325901)	r(EGID:55299)	-	decreases	PubMed_19251651	carcinoma
a(SCHEM:PD0325901)	r(EGID:55720)	-	decreases	PubMed_19251651	carcinoma
a(SCHEM:PD0325901)	r(EGID:5606)	-	decreases	PubMed_19251651	carcinoma
a(SCHEM:PD0325901)	r(EGID:56342)	-	decreases	PubMed_19251651	carcinoma
a(SCHEM:PD0325901)	r(EGID:57556)	+	increases	PubMed_19251651	carcinoma
a(SCHEM:PD0325901)	r(EGID:595)	-	decreases	PubMed_19251651	carcinoma
a(SCHEM:PD0325901)	r(EGID:6510)	-	decreases	PubMed_19251651	carcinoma
a(SCHEM:PD0325901)	r(EGID:65263)	-	decreases	PubMed_19251651	carcinoma
a(SCHEM:PD0325901)	r(EGID:705)	-	decreases	PubMed_19251651	carcinoma
a(SCHEM:PD0325901)	r(EGID:7262)	-	decreases	PubMed_19251651	carcinoma
a(SCHEM:PD0325901)	r(EGID:79071)	-	decreases	PubMed_19251651	carcinoma
a(SCHEM:PD0325901)	r(EGID:79693)	-	decreases	PubMed_19251651	carcinoma
a(SCHEM:PD0325901)	r(EGID:8061)	-	decreases	PubMed_19251651	carcinoma
a(SCHEM:PD0325901)	r(EGID:8091)	-	decreases	PubMed_19251651	carcinoma
a(SCHEM:PD0325901)	r(EGID:81848)	-	decreases	PubMed_19251651	carcinoma
a(SCHEM:PD0325901)	r(EGID:8870)	-	decreases	PubMed_19251651	carcinoma
a(SCHEM:PD0325901)	r(EGID:9188)	-	decreases	PubMed_19251651	carcinoma
a(SCHEM:PD0325901)	r(EGID:9331)	-	decreases	PubMed_19251651	carcinoma
a(SCHEM:PD0325901)	r(EGID:9497)	-	decreases	PubMed_19251651	carcinoma
a(SCHEM:PD0325901)	r(EGID:9533)	-	decreases	PubMed_19251651	carcinoma
