# Supplementary material for: Mechanisms of Pinometostat (EPZ-5676) Treatment–Emergent Resistance in MLL -Rearranged Leukemia
Source: Oxford University Press journal article supplement (doi:10.1158/1535-7163.mct-16-0693), 2017-04-20
Supplement: 15357163mct160693-sup-173311_3_unknown_upload_3981943_wwwrg3.xls [file 15357163mct160693-sup-173311_3_unknown_upload_3981943_wwwrg3.xls]

## Sheet: Pathways
KEGG
ID	p.adjust	Count
KEGG_RIBOSOME	1.81668e-44	73
REACTOME_PEPTIDE_CHAIN_ELONGATION	4.81075e-32	73
BILANGES_SERUM_AND_RAPAMYCIN_SENSITIVE_GENES	4.47179e-30	53
HSIAO_HOUSEKEEPING_GENES	3.49707e-29	146
REACTOME_INFLUENZA_VIRAL_RNA_TRANSCRIPTION_AND_REPLICATION	6.72669e-29	75
REACTOME_SRP_DEPENDENT_COTRANSLATIONAL_PROTEIN_TARGETING_TO_MEMBRANE	1.0528e-28	77
REACTOME_3_UTR_MEDIATED_TRANSLATIONAL_REGULATION	1.56088e-27	75
REACTOME_TRANSLATION	2.53155e-26	86
REACTOME_NONSENSE_MEDIATED_DECAY_ENHANCED_BY_THE_EXON_JUNCTION_COMPLEX	7.48305e-26	73
REACTOME_INFLUENZA_LIFE_CYCLE	4.24062e-23	78
PECE_MAMMARY_STEM_CELL_UP	2.83402e-17	64
VERHAAK_AML_WITH_NPM1_MUTATED_DN	2.14357e-16	88
REACTOME_METABOLISM_OF_MRNA	2.8348e-15	85
CHNG_MULTIPLE_MYELOMA_HYPERPLOID_UP	6.69405e-14	33
TIEN_INTESTINE_PROBIOTICS_6HR_UP	7.10316e-14	34
REACTOME_METABOLISM_OF_PROTEINS	9.99034e-14	128
REACTOME_METABOLISM_OF_RNA	1.10604e-13	92
TAKEDA_TARGETS_OF_NUP98_HOXA9_FUSION_8D_DN	4.70382e-12	70
TAKEDA_TARGETS_OF_NUP98_HOXA9_FUSION_16D_UP	7.74858e-12	62
JAATINEN_HEMATOPOIETIC_STEM_CELL_UP	7.82052e-12	91
TAKEDA_TARGETS_OF_NUP98_HOXA9_FUSION_10D_DN	6.94857e-11	52
TAKEDA_TARGETS_OF_NUP98_HOXA9_FUSION_10D_UP	8.8311e-11	64
REACTOME_RNA_POL_I_PROMOTER_OPENING	2.03138e-10	32
WU_CELL_MIGRATION	2.07909e-10	63
BILANGES_SERUM_RESPONSE_TRANSLATION	4.59385e-10	23
FLOTHO_PEDIATRIC_ALL_THERAPY_RESPONSE_UP	5.06537e-10	29
TIEN_INTESTINE_PROBIOTICS_24HR_DN	5.69848e-10	69
REACTOME_AMYLOIDS	6.70469e-10	37
TARTE_PLASMA_CELL_VS_PLASMABLAST_UP	6.70469e-10	104
LI_AMPLIFIED_IN_LUNG_CANCER	9.0305e-10	60
CHYLA_CBFA2T3_TARGETS_UP	9.10459e-10	101
RUTELLA_RESPONSE_TO_HGF_VS_CSF2RB_AND_IL4_UP	1.39757e-09	105
VERHAAK_AML_WITH_NPM1_MUTATED_UP	1.41321e-09	60
RUTELLA_RESPONSE_TO_CSF2RB_AND_IL4_DN	2.35951e-09	87
JISON_SICKLE_CELL_DISEASE_DN	2.54511e-09	59
SMIRNOV_CIRCULATING_ENDOTHELIOCYTES_IN_CANCER_UP	3.15112e-09	54
MULLIGHAN_MLL_SIGNATURE_1_DN	3.23574e-09	71
IGLESIAS_E2F_TARGETS_UP	4.35604e-09	53
REACTOME_PACKAGING_OF_TELOMERE_ENDS	6.09035e-09	26
VERHAAK_GLIOBLASTOMA_MESENCHYMAL	7.98541e-09	66
ONDER_CDH1_TARGETS_2_DN	8.87548e-09	113
GAL_LEUKEMIC_STEM_CELL_DN	8.90074e-09	72
REACTOME_FORMATION_OF_THE_TERNARY_COMPLEX_AND_SUBSEQUENTLY_THE_43S_COMPLEX	9.89428e-09	29
JAEGER_METASTASIS_DN	1.66085e-08	74
OSMAN_BLADDER_CANCER_DN	1.66085e-08	96
REACTOME_MEIOTIC_RECOMBINATION	3.63229e-08	35
LEE_LIVER_CANCER_SURVIVAL_DN	4.05585e-08	55
WANG_TUMOR_INVASIVENESS_UP	4.12069e-08	95
DELYS_THYROID_CANCER_UP	4.29433e-08	109
BOYLAN_MULTIPLE_MYELOMA_C_D_DN	4.3708e-08	70
YAMASHITA_LIVER_CANCER_WITH_EPCAM_UP	4.78277e-08	26
RHEIN_ALL_GLUCOCORTICOID_THERAPY_DN	6.63062e-08	92
CASORELLI_ACUTE_PROMYELOCYTIC_LEUKEMIA_UP	7.50529e-08	53
REACTOME_MEIOTIC_SYNAPSIS	7.50529e-08	31
YAGI_AML_FAB_MARKERS	7.50529e-08	58
DIAZ_CHRONIC_MEYLOGENOUS_LEUKEMIA_DN	7.5962e-08	42
DIRMEIER_LMP1_RESPONSE_EARLY	8.61102e-08	29
KAN_RESPONSE_TO_ARSENIC_TRIOXIDE	9.2481e-08	43
CHARAFE_BREAST_CANCER_LUMINAL_VS_BASAL_DN	1.03916e-07	107
ZHONG_SECRETOME_OF_LUNG_CANCER_AND_ENDOTHELIUM	1.28138e-07	29
BOQUEST_STEM_CELL_CULTURED_VS_FRESH_UP	1.46844e-07	102
RODWELL_AGING_KIDNEY_UP	1.88865e-07	110
DANG_MYC_TARGETS_UP	2.28607e-07	47
CHARAFE_BREAST_CANCER_LUMINAL_VS_MESENCHYMAL_DN	2.80003e-07	107
REACTOME_ACTIVATION_OF_THE_MRNA_UPON_BINDING_OF_THE_CAP_BINDING_COMPLEX_AND_EIFS_AND_SUBSEQUENT_BINDING_TO_43S	2.80003e-07	29
SARRIO_EPITHELIAL_MESENCHYMAL_TRANSITION_DN	3.20936e-07	48
REACTOME_MEIOSIS	3.33382e-07	40
GOLDRATH_ANTIGEN_RESPONSE	3.35105e-07	86
SCHUETZ_BREAST_CANCER_DUCTAL_INVASIVE_UP	3.71858e-07	87
OSWALD_HEMATOPOIETIC_STEM_CELL_IN_COLLAGEN_GEL_UP	4.16041e-07	64
BRACHAT_RESPONSE_TO_CAMPTOTHECIN_DN	4.16395e-07	22
HECKER_IFNB1_TARGETS	4.17453e-07	35
KEGG_SYSTEMIC_LUPUS_ERYTHEMATOSUS	4.21985e-07	45
REACTOME_DEPOSITION_OF_NEW_CENPA_CONTAINING_NUCLEOSOMES_AT_THE_CENTROMERE	4.63009e-07	27
RUTELLA_RESPONSE_TO_HGF_UP	5.01747e-07	98
ONDER_CDH1_TARGETS_2_UP	5.76663e-07	68
HOLLEMAN_ASPARAGINASE_RESISTANCE_B_ALL_UP	5.92411e-07	16
JIANG_HYPOXIA_NORMAL	7.94894e-07	78
REACTOME_RNA_POL_I_TRANSCRIPTION	7.94894e-07	33
WIERENGA_STAT5A_TARGETS_UP	8.56693e-07	59
MULLIGHAN_MLL_SIGNATURE_2_DN	8.81006e-07	72
RUTELLA_RESPONSE_TO_HGF_DN	9.06724e-07	64
JAATINEN_HEMATOPOIETIC_STEM_CELL_DN	1.05832e-06	62
DAVICIONI_TARGETS_OF_PAX_FOXO1_FUSIONS_UP	1.06101e-06	67
BOSCO_ALLERGEN_INDUCED_TH2_ASSOCIATED_MODULE	1.11063e-06	46
TAKEDA_TARGETS_OF_NUP98_HOXA9_FUSION_16D_DN	1.12111e-06	42
MODY_HIPPOCAMPUS_PRENATAL	1.26676e-06	21
LINDGREN_BLADDER_CANCER_CLUSTER_2B	1.70834e-06	92
SMID_BREAST_CANCER_NORMAL_LIKE_UP	1.81315e-06	106
PETROVA_ENDOTHELIUM_LYMPHATIC_VS_BLOOD_DN	2.43755e-06	48
PODAR_RESPONSE_TO_ADAPHOSTIN_UP	2.43755e-06	45
PID_INTEGRIN1_PATHWAY	2.84752e-06	27
HADDAD_B_LYMPHOCYTE_PROGENITOR	2.87435e-06	71
TORCHIA_TARGETS_OF_EWSR1_FLI1_FUSION_DN	3.17621e-06	77
YAGI_AML_WITH_INV_16_TRANSLOCATION	3.34406e-06	97
WANG_RESPONSE_TO_GSK3_INHIBITOR_SB216763_UP	3.64747e-06	86
POOLA_INVASIVE_BREAST_CANCER_UP	3.6589e-06	72
GEORGANTAS_HSC_MARKERS	3.88676e-06	27
HELLER_SILENCED_BY_METHYLATION_UP	4.17947e-06	72
LI_INDUCED_T_TO_NATURAL_KILLER_UP	4.32769e-06	75
LIM_MAMMARY_STEM_CELL_UP	4.90741e-06	105
LEI_MYB_TARGETS	5.01637e-06	78
ENK_UV_RESPONSE_EPIDERMIS_DN	5.59128e-06	111
TAKEDA_TARGETS_OF_NUP98_HOXA9_FUSION_8D_UP	8.15656e-06	45
LIU_PROSTATE_CANCER_DN	8.90151e-06	104
DUTERTRE_ESTRADIOL_RESPONSE_24HR_DN	9.66099e-06	109
POMEROY_MEDULLOBLASTOMA_PROGNOSIS_DN	1.01265e-05	20
PICCALUGA_ANGIOIMMUNOBLASTIC_LYMPHOMA_DN	1.07583e-05	40
BOQUEST_STEM_CELL_UP	1.15179e-05	66
HELLER_HDAC_TARGETS_SILENCED_BY_METHYLATION_UP	1.24826e-05	100
PHONG_TNF_RESPONSE_NOT_VIA_P38	1.25349e-05	80
YU_MYC_TARGETS_UP	1.27588e-05	19
RIGGI_EWING_SARCOMA_PROGENITOR_UP	1.28018e-05	94
REACTOME_TELOMERE_MAINTENANCE	1.30009e-05	28
TONKS_TARGETS_OF_RUNX1_RUNX1T1_FUSION_HSC_DN	1.33124e-05	51
POMEROY_MEDULLOBLASTOMA_DESMOPLASIC_VS_CLASSIC_DN	1.36994e-05	24
TONKS_TARGETS_OF_RUNX1_RUNX1T1_FUSION_ERYTHROCYTE_UP	1.676e-05	45
ROZANOV_MMP14_TARGETS_UP	1.67767e-05	66
BILANGES_RAPAMYCIN_SENSITIVE_VIA_TSC1_AND_TSC2	1.80766e-05	27
GRAHAM_CML_DIVIDING_VS_NORMAL_QUIESCENT_UP	1.8314e-05	50
AZARE_NEOPLASTIC_TRANSFORMATION_BY_STAT3_UP	1.86694e-05	37
NELSON_RESPONSE_TO_ANDROGEN_UP	1.93948e-05	30
LUI_THYROID_CANCER_PAX8_PPARG_DN	2.19769e-05	20
CHAUHAN_RESPONSE_TO_METHOXYESTRADIOL_DN	2.40131e-05	33
KINSEY_TARGETS_OF_EWSR1_FLII_FUSION_DN	2.80889e-05	75
NING_CHRONIC_OBSTRUCTIVE_PULMONARY_DISEASE_DN	2.87318e-05	37
PEREZ_TP63_TARGETS	3.03394e-05	78
COATES_MACROPHAGE_M1_VS_M2_DN	3.16565e-05	27
BOHN_PRIMARY_IMMUNODEFICIENCY_SYNDROM_UP	3.17457e-05	20
IRITANI_MAD1_TARGETS_DN	3.17457e-05	20
ZWANG_CLASS_1_TRANSIENTLY_INDUCED_BY_EGF	3.17457e-05	107
AMIT_SERUM_RESPONSE_40_MCF10A	3.85352e-05	16
HESS_TARGETS_OF_HOXA9_AND_MEIS1_DN	4.13354e-05	27
BASAKI_YBX1_TARGETS_DN	4.1342e-05	84
CREIGHTON_ENDOCRINE_THERAPY_RESISTANCE_1	4.1342e-05	107
MONNIER_POSTRADIATION_TUMOR_ESCAPE_DN	4.1342e-05	82
MILI_PSEUDOPODIA_CHEMOTAXIS_DN	4.43171e-05	96
KEGG_ECM_RECEPTOR_INTERACTION	4.43561e-05	29
JOHNSTONE_PARVB_TARGETS_3_UP	4.65448e-05	92
DUNNE_TARGETS_OF_AML1_MTG8_FUSION_UP	4.73978e-05	21
KEGG_HEMATOPOIETIC_CELL_LINEAGE	5.72035e-05	29
SHIPP_DLBCL_VS_FOLLICULAR_LYMPHOMA_UP	6.18201e-05	19
CHIANG_LIVER_CANCER_SUBCLASS_UNANNOTATED_DN	6.33756e-05	50
WANG_RESPONSE_TO_GSK3_INHIBITOR_SB216763_DN	6.33756e-05	80
CROONQUIST_NRAS_VS_STROMAL_STIMULATION_DN	6.33908e-05	32
DUTERTRE_ESTRADIOL_RESPONSE_6HR_DN	6.33908e-05	30
ELVIDGE_HYPOXIA_BY_DMOG_UP	6.33908e-05	38
HILLION_HMGA1B_TARGETS	6.33908e-05	30
ZHU_CMV_8_HR_DN	6.49506e-05	21
ZHANG_TLX_TARGETS_60HR_UP	7.1026e-05	69
HELLER_HDAC_TARGETS_DN	7.44493e-05	68
VANASSE_BCL2_TARGETS_DN	7.71861e-05	25
KIM_MYC_AMPLIFICATION_TARGETS_UP	8.11761e-05	51
KUMAR_TARGETS_OF_MLL_AF9_FUSION	8.25595e-05	87
MARTORIATI_MDM4_TARGETS_NEUROEPITHELIUM_UP	8.54853e-05	46
TIEN_INTESTINE_PROBIOTICS_2HR_UP	8.74442e-05	14
MCLACHLAN_DENTAL_CARIES_UP	8.82989e-05	61
LUI_TARGETS_OF_PAX8_PPARG_FUSION	8.9537e-05	16
SENESE_HDAC3_TARGETS_UP	9.28125e-05	102
ALCALAY_AML_BY_NPM1_LOCALIZATION_DN	9.50458e-05	49
SENGUPTA_NASOPHARYNGEAL_CARCINOMA_UP	9.57892e-05	67
HASLINGER_B_CLL_WITH_13Q14_DELETION	0.000100405	13
PLASARI_TGFB1_TARGETS_10HR_DN	0.000107056	59
HILLION_HMGA1_TARGETS	0.000108494	29
RUTELLA_RESPONSE_TO_CSF2RB_AND_IL4_UP	0.000108494	75
BILD_HRAS_ONCOGENIC_SIGNATURE	0.000109745	61
GRUETZMANN_PANCREATIC_CANCER_UP	0.000109745	80
ELVIDGE_HYPOXIA_UP	0.000111889	45
RUIZ_TNC_TARGETS_UP	0.000111889	42
FARMER_BREAST_CANCER_APOCRINE_VS_BASAL	0.000126366	74
SCHAEFFER_PROSTATE_DEVELOPMENT_48HR_DN	0.000126736	90
LUI_THYROID_CANCER_CLUSTER_3	0.000138303	14
HADDAD_T_LYMPHOCYTE_AND_NK_PROGENITOR_DN	0.000154053	22
GROSS_HYPOXIA_VIA_ELK3_DN	0.000156175	42
TONKS_TARGETS_OF_RUNX1_RUNX1T1_FUSION_MONOCYTE_UP	0.000156675	51
MCBRYAN_PUBERTAL_BREAST_4_5WK_UP	0.000161143	63
GRADE_COLON_AND_RECTAL_CANCER_UP	0.000161436	65
OLSSON_E2F3_TARGETS_DN	0.000161436	19
REACTOME_RNA_POL_I_RNA_POL_III_AND_MITOCHONDRIAL_TRANSCRIPTION	0.000161436	35
BENPORATH_MYC_TARGETS_WITH_EBOX	0.000169351	56
CHIANG_LIVER_CANCER_SUBCLASS_PROLIFERATION_UP	0.000174651	45
PEREZ_TP53_AND_TP63_TARGETS	0.000181336	50
HELLER_HDAC_TARGETS_UP	0.000191459	70
KOBAYASHI_EGFR_SIGNALING_24HR_UP	0.000191459	31
WALLACE_PROSTATE_CANCER_RACE_UP	0.000202335	67
HOLLEMAN_VINCRISTINE_RESISTANCE_ALL_DN	0.000210981	11
NATSUME_RESPONSE_TO_INTERFERON_BETA_DN	0.000216294	20
HOOI_ST7_TARGETS_DN	0.000221058	34
RODWELL_AGING_KIDNEY_NO_BLOOD_UP	0.000221058	52
SANSOM_APC_TARGETS_DN	0.000224623	79
MASSARWEH_TAMOXIFEN_RESISTANCE_DN	0.000231492	57
DEURIG_T_CELL_PROLYMPHOCYTIC_LEUKEMIA_UP	0.000238352	78
FOSTER_TOLERANT_MACROPHAGE_DN	0.000250921	86
TONKS_TARGETS_OF_RUNX1_RUNX1T1_FUSION_HSC_UP	0.000253893	47
LIM_MAMMARY_LUMINAL_MATURE_DN	0.000264085	30
KYNG_WERNER_SYNDROM_AND_NORMAL_AGING_UP	0.000280193	28
HARRIS_HYPOXIA	0.000284698	26
MALONEY_RESPONSE_TO_17AAG_DN	0.000284698	26
QI_PLASMACYTOMA_UP	0.000303786	61
TAKEDA_TARGETS_OF_NUP98_HOXA9_FUSION_3D_UP	0.000304384	45
SHEDDEN_LUNG_CANCER_POOR_SURVIVAL_A6	0.000306377	92
REACTOME_CHROMOSOME_MAINTENANCE	0.000310646	34
MORI_LARGE_PRE_BII_LYMPHOCYTE_UP	0.000311603	27
VALK_AML_WITH_EVI1	0.000314842	12
PHONG_TNF_RESPONSE_VIA_P38_PARTIAL	0.000315839	42
WINTER_HYPOXIA_METAGENE	0.000321476	57
KEEN_RESPONSE_TO_ROSIGLITAZONE_DN	0.000330202	31
GU_PDEF_TARGETS_UP	0.000346771	24
BASSO_HAIRY_CELL_LEUKEMIA_DN	0.000347169	26
WANG_ESOPHAGUS_CANCER_VS_NORMAL_UP	0.000354179	33
RUTELLA_RESPONSE_TO_HGF_VS_CSF2RB_AND_IL4_DN	0.000358142	57
BROWN_MYELOID_CELL_DEVELOPMENT_DN	0.000366534	35
HELLER_HDAC_TARGETS_SILENCED_BY_METHYLATION_DN	0.000366534	63
BROWNE_HCMV_INFECTION_2HR_UP	0.000381769	16
PRAMOONJAGO_SOX4_TARGETS_DN	0.000381769	19
SWEET_LUNG_CANCER_KRAS_UP	0.000381769	99
NAKAJIMA_MAST_CELL	0.000390561	18
DAZARD_RESPONSE_TO_UV_NHEK_UP	0.000393227	57
MCBRYAN_PUBERTAL_TGFB1_TARGETS_UP	0.000393227	44
FULCHER_INFLAMMATORY_RESPONSE_LECTIN_VS_LPS_DN	0.000407829	92
CAIRO_HEPATOBLASTOMA_UP	0.000417752	50
ODONNELL_TFRC_TARGETS_UP	0.000417752	84
SWEET_KRAS_TARGETS_UP	0.000417752	26
ZHONG_SECRETOME_OF_LUNG_CANCER_AND_FIBROBLAST	0.000425097	36
FLECHNER_BIOPSY_KIDNEY_TRANSPLANT_REJECTED_VS_OK_UP	0.000453237	27
MOOTHA_GLUCONEOGENESIS	0.000461522	14
FOURNIER_ACINAR_DEVELOPMENT_LATE_2	0.000465532	62
GAZDA_DIAMOND_BLACKFAN_ANEMIA_ERYTHROID_DN	0.000507075	98
VALK_AML_CLUSTER_9	0.000507075	15
LEE_RECENT_THYMIC_EMIGRANT	0.000510503	51
MCLACHLAN_DENTAL_CARIES_DN	0.000510503	56
BRUECKNER_TARGETS_OF_MIRLET7A3_DN	0.000524955	24
PID_INTEGRIN3_PATHWAY	0.000525376	17
HAHTOLA_MYCOSIS_FUNGOIDES_CD4_UP	0.000562937	21
WANG_SMARCE1_TARGETS_UP	0.000570889	62
WIERENGA_STAT5A_TARGETS_GROUP1	0.000579406	35
MARIADASON_RESPONSE_TO_BUTYRATE_SULINDAC_4	0.00058787	11
TIAN_TNF_SIGNALING_NOT_VIA_NFKB	0.00058787	11
NAKAJIMA_EOSINOPHIL	0.000591999	13
SENGUPTA_NASOPHARYNGEAL_CARCINOMA_WITH_LMP1_UP	0.000600366	82
GARGALOVIC_RESPONSE_TO_OXIDIZED_PHOSPHOLIPIDS_TURQUOISE_UP	0.000647497	24
KEGG_ARRHYTHMOGENIC_RIGHT_VENTRICULAR_CARDIOMYOPATHY_ARVC	0.000647497	24
BHATTACHARYA_EMBRYONIC_STEM_CELL	0.000662645	27
ALTEMEIER_RESPONSE_TO_LPS_WITH_MECHANICAL_VENTILATION	0.000671441	35
TSUNODA_CISPLATIN_RESISTANCE_DN	0.000680084	18
MORI_PRE_BI_LYMPHOCYTE_UP	0.000704778	25
BAELDE_DIABETIC_NEPHROPATHY_DN	0.000722933	89
HOLLEMAN_VINCRISTINE_RESISTANCE_B_ALL_DN	0.000725269	9
HAHTOLA_CTCL_CUTANEOUS	0.000756864	12
BASSO_B_LYMPHOCYTE_NETWORK	0.000765854	37
JOHANSSON_GLIOMAGENESIS_BY_PDGFB_UP	0.000765854	20
LIAN_LIPA_TARGETS_3M	0.000765854	20
WIERENGA_STAT5A_TARGETS_GROUP2	0.000765854	20
JECHLINGER_EPITHELIAL_TO_MESENCHYMAL_TRANSITION_DN	0.000801897	22
MATSUDA_NATURAL_KILLER_DIFFERENTIATION	0.000813094	95
GUTIERREZ_CHRONIC_LYMPHOCYTIC_LEUKEMIA_DN	0.000826188	19
LEE_LIVER_CANCER_MYC_UP	0.000826188	19
VECCHI_GASTRIC_CANCER_EARLY_UP	0.000846586	84
PETROVA_PROX1_TARGETS_DN	0.000884327	21
PHONG_TNF_TARGETS_UP	0.000884327	21
PLASARI_TGFB1_TARGETS_10HR_UP	0.000904292	48
HORIUCHI_WTAP_TARGETS_DN	0.00094847	66
LEIN_ASTROCYTE_MARKERS	0.00094847	16
LIN_MELANOMA_COPY_NUMBER_DN	0.00094847	16
REACTOME_AXON_GUIDANCE	0.00094847	56
SWEET_LUNG_CANCER_KRAS_DN	0.00094847	88
RICKMAN_TUMOR_DIFFERENTIATED_WELL_VS_POORLY_UP	0.000990961	53
CHEN_LVAD_SUPPORT_OF_FAILING_HEART_UP	0.00100397	29
XU_GH1_AUTOCRINE_TARGETS_DN	0.00101394	36
HENDRICKS_SMARCA4_TARGETS_UP	0.00105631	19
NAGASHIMA_NRG1_SIGNALING_UP	0.00110066	43
BRACHAT_RESPONSE_TO_METHOTREXATE_DN	0.00111595	12
DEN_INTERACT_WITH_LCA5	0.00111595	12
PID_INTEGRIN_CS_PATHWAY	0.00111595	12
PICCALUGA_ANGIOIMMUNOBLASTIC_LYMPHOMA_UP	0.00111866	48
WIERENGA_STAT5A_TARGETS_DN	0.00111866	48
DURAND_STROMA_S_UP	0.00112403	63
BROWN_MYELOID_CELL_DEVELOPMENT_UP	0.00120773	40
CROONQUIST_STROMAL_STIMULATION_UP	0.00121311	20
REN_ALVEOLAR_RHABDOMYOSARCOMA_DN	0.00121311	83
BILBAN_B_CLL_LPL_DN	0.00125935	16
LIANG_HEMATOPOIESIS_STEM_CELL_NUMBER_LARGE_VS_TINY_UP	0.00125935	16
LENAOUR_DENDRITIC_CELL_MATURATION_DN	0.00139402	34
BORCZUK_MALIGNANT_MESOTHELIOMA_UP	0.00145734	65
HALMOS_CEBPA_TARGETS_UP	0.00146893	18
MENSSEN_MYC_TARGETS	0.00146893	18
SCHUETZ_BREAST_CANCER_DUCTAL_INVASIVE_DN	0.00149411	25
YOSHIMURA_MAPK8_TARGETS_DN	0.00150726	75
CUI_TCF21_TARGETS_2_UP	0.00156435	85
CHEBOTAEV_GR_TARGETS_UP	0.00162179	23
RODRIGUES_THYROID_CARCINOMA_DN	0.00162179	23
AMIT_SERUM_RESPONSE_60_MCF10A	0.00171222	19
GROSS_HYPOXIA_VIA_ELK3_AND_HIF1A_UP	0.00177991	36
HEDENFALK_BREAST_CANCER_BRACX_UP	0.00181477	10
SU_THYMUS	0.00181477	10
CREIGHTON_ENDOCRINE_THERAPY_RESISTANCE_5	0.00185524	89
BILBAN_B_CLL_LPL_UP	0.00192956	20
KOKKINAKIS_METHIONINE_DEPRIVATION_96HR_UP	0.00193652	31
BILD_MYC_ONCOGENIC_SIGNATURE	0.00194685	46
CONCANNON_APOPTOSIS_BY_EPOXOMICIN_DN	0.0020139	40
GAJATE_RESPONSE_TO_TRABECTEDIN_UP	0.00211166	21
ROSS_AML_OF_FAB_M7_TYPE	0.00211166	21
MARTENS_BOUND_BY_PML_RARA_FUSION	0.00212007	87
KOKKINAKIS_METHIONINE_DEPRIVATION_48HR_UP	0.00217182	33
PID_INTEGRIN_A9B1_PATHWAY	0.00217182	11
ZHOU_INFLAMMATORY_RESPONSE_LIVE_UP	0.00229358	89
SENESE_HDAC1_AND_HDAC2_TARGETS_DN	0.00230473	49
HORIUCHI_WTAP_TARGETS_UP	0.00234666	63
HWANG_PROSTATE_CANCER_MARKERS	0.00237252	12
TAKEDA_TARGETS_OF_NUP98_HOXA9_FUSION_3D_DN	0.00237252	12
JIANG_AGING_CEREBRAL_CORTEX_UP	0.0024282	14
REACTOME_GLUCONEOGENESIS	0.00243729	13
VALK_AML_CLUSTER_10	0.00243729	13
GHANDHI_BYSTANDER_IRRADIATION_UP	0.00246676	24
REACTOME_DIABETES_PATHWAYS	0.00247422	33
LI_WILMS_TUMOR_VS_FETAL_KIDNEY_1_UP	0.00248169	43
JUBAN_TARGETS_OF_SPI1_AND_FLI1_DN	0.00252042	25
TAKAO_RESPONSE_TO_UVB_RADIATION_UP	0.00252042	25
FORTSCHEGGER_PHF8_TARGETS_UP	0.00255959	57
REACTOME_SIGNALING_BY_ILS	0.00260202	29
WANG_MLL_TARGETS	0.00260847	61
LIAN_LIPA_TARGETS_6M	0.00269659	22
KEGG_AXON_GUIDANCE	0.00280519	33
KIM_RESPONSE_TO_TSA_AND_DECITABINE_UP	0.00280519	33
MCDOWELL_ACUTE_LUNG_INJURY_UP	0.00280519	16
REACTOME_NUCLEOTIDE_BINDING_DOMAIN_LEUCINE_RICH_REPEAT_CONTAINING_RECEPTOR_NLR_SIGNALING_PATHWAYS	0.00280519	16
CHIANG_LIVER_CANCER_SUBCLASS_CTNNB1_DN	0.00281042	40
BERENJENO_TRANSFORMED_BY_RHOA_DN	0.00282687	78
KEGG_FOCAL_ADHESION	0.00292964	46
ACEVEDO_LIVER_CANCER_WITH_H3K9ME3_DN	0.00296794	30
CROONQUIST_IL6_DEPRIVATION_DN	0.00299251	27
ELVIDGE_HIF1A_AND_HIF2A_TARGETS_DN	0.00299251	28
HELLER_SILENCED_BY_METHYLATION_DN	0.00299251	28
KOYAMA_SEMA3B_TARGETS_DN	0.00299251	77
ZHAN_MULTIPLE_MYELOMA_DN	0.00299251	15
MANALO_HYPOXIA_UP	0.00304278	47
LINDGREN_BLADDER_CANCER_CLUSTER_2A_DN	0.00307013	34
MAHAJAN_RESPONSE_TO_IL1A_DN	0.00319041	22
YAMAZAKI_TCEB3_TARGETS_DN	0.00319041	48
BURTON_ADIPOGENESIS_PEAK_AT_2HR	0.0032105	17
HU_GENOTOXIC_DAMAGE_24HR	0.00322411	13
LEE_NEURAL_CREST_STEM_CELL_DN	0.00338769	30
HAHTOLA_MYCOSIS_FUNGOIDES_UP	0.00342784	9
REACTOME_GLYCOSAMINOGLYCAN_METABOLISM	0.00342784	29
VECCHI_GASTRIC_CANCER_ADVANCED_VS_EARLY_UP	0.00348939	40
WEST_ADRENOCORTICAL_TUMOR_UP	0.00361565	61
LINDGREN_BLADDER_CANCER_CLUSTER_3_DN	0.00367306	49
ROSS_AML_WITH_AML1_ETO_FUSION	0.00384902	22
SCHAEFFER_PROSTATE_DEVELOPMENT_12HR_UP	0.00391481	30
DAVICIONI_RHABDOMYOSARCOMA_PAX_FOXO1_FUSION_UP	0.0039463	19
LEE_LIVER_CANCER_DENA_UP	0.0039463	19
PEDERSEN_METASTASIS_BY_ERBB2_ISOFORM_7	0.00397633	76
BASSO_CD40_SIGNALING_UP	0.00403565	27
BROWNE_HCMV_INFECTION_20HR_DN	0.00403565	27
CHIBA_RESPONSE_TO_TSA_DN	0.00403565	10
HOLLEMAN_ASPARAGINASE_RESISTANCE_ALL_UP	0.00403565	10
HIRSCH_CELLULAR_TRANSFORMATION_SIGNATURE_UP	0.00404755	52
XU_HGF_SIGNALING_NOT_VIA_AKT1_6HR	0.00438085	11
FERNANDEZ_BOUND_BY_MYC	0.00439721	42
EBAUER_TARGETS_OF_PAX3_FOXO1_FUSION_DN	0.00448853	16
RADMACHER_AML_PROGNOSIS	0.00456979	22
BROWNE_HCMV_INFECTION_16HR_DN	0.00472756	24
FERRANDO_T_ALL_WITH_MLL_ENL_FUSION_UP	0.00472756	24
HINATA_NFKB_TARGETS_KERATINOCYTE_UP	0.00472756	25
REN_ALVEOLAR_RHABDOMYOSARCOMA_UP	0.00472756	26
SANA_TNF_SIGNALING_DN	0.00472756	25
ZHU_CMV_ALL_DN	0.00478518	32
UEDA_PERIFERAL_CLOCK	0.0051279	39
ZWANG_CLASS_3_TRANSIENTLY_INDUCED_BY_EGF	0.00518894	48
JIANG_VHL_TARGETS	0.00528456	33
BOYLAN_MULTIPLE_MYELOMA_PCA3_UP	0.00543254	22
THEILGAARD_NEUTROPHIL_AT_SKIN_WOUND_UP	0.00543254	22
NAGASHIMA_EGF_SIGNALING_UP	0.00548046	18
GALINDO_IMMUNE_RESPONSE_TO_ENTEROTOXIN	0.005491	23
MUNSHI_MULTIPLE_MYELOMA_UP	0.005491	23
TAVOR_CEBPA_TARGETS_UP	0.00562268	16
TORCHIA_TARGETS_OF_EWSR1_FLI1_FUSION_UP	0.00574502	55
LEE_LIVER_CANCER_E2F1_UP	0.00582397	19
KIM_GERMINAL_CENTER_T_HELPER_DN	0.00587447	10
KYNG_DNA_DAMAGE_DN	0.00591397	44
CAIRO_LIVER_DEVELOPMENT_UP	0.00596677	38
HONMA_DOCETAXEL_RESISTANCE	0.00596677	12
YAMAZAKI_TCEB3_TARGETS_UP	0.00597752	40
DOANE_RESPONSE_TO_ANDROGEN_DN	0.00616995	51
ZHOU_TNF_SIGNALING_4HR	0.00616995	17
BAE_BRCA1_TARGETS_UP	0.00620559	21
CROONQUIST_NRAS_SIGNALING_DN	0.00620559	21
JIANG_TIP30_TARGETS_UP	0.00620559	15
ALCALAY_AML_BY_NPM1_LOCALIZATION_UP	0.00657535	33
KLEIN_PRIMARY_EFFUSION_LYMPHOMA_DN	0.00657535	18
LEE_LIVER_CANCER_HEPATOBLAST	0.00657535	8
LI_WILMS_TUMOR_VS_FETAL_KIDNEY_1_DN	0.00657535	38
NGO_MALIGNANT_GLIOMA_1P_LOH	0.00657535	8
SASAKI_ADULT_T_CELL_LEUKEMIA	0.00657535	40
SERVITJA_LIVER_HNF1A_TARGETS_UP	0.00657535	33
VERRECCHIA_EARLY_RESPONSE_TO_TGFB1	0.00657535	18
GERHOLD_ADIPOGENESIS_DN	0.00691792	19
VANTVEER_BREAST_CANCER_ESR1_DN	0.0071264	50
RHODES_UNDIFFERENTIATED_CANCER	0.00718037	20
UZONYI_RESPONSE_TO_LEUKOTRIENE_AND_THROMBIN	0.00737186	13
VALK_AML_CLUSTER_11	0.00737186	13
NEMETH_INFLAMMATORY_RESPONSE_LPS_UP	0.00741011	24
REACTOME_INTEGRIN_CELL_SURFACE_INTERACTIONS	0.00741011	22
GRAHAM_CML_QUIESCENT_VS_NORMAL_DIVIDING_UP	0.00745691	17
LEE_EARLY_T_LYMPHOCYTE_DN	0.00745691	17
AMIT_EGF_RESPONSE_480_HELA	0.00766106	37
MOOTHA_GLYCOLYSIS	0.00766106	9
VILIMAS_NOTCH1_TARGETS_DN	0.00766106	9
PID_RHOA_REG_PATHWAY	0.00766802	15
FARDIN_HYPOXIA_11	0.00777846	12
FONTAINE_PAPILLARY_THYROID_CARCINOMA_UP	0.00788473	18
REACTOME_P38MAPK_EVENTS	0.00794783	7
WHITESIDE_CISPLATIN_RESISTANCE_DN	0.00794783	7
MURATA_VIRULENCE_OF_H_PILORI	0.00807687	10
MAGRANGEAS_MULTIPLE_MYELOMA_IGLL_VS_IGLK_UP	0.00857118	14
BURTON_ADIPOGENESIS_8	0.0085979	23
PID_AVB3_INTEGRIN_PATHWAY	0.0085979	21
REACTOME_CELL_SURFACE_INTERACTIONS_AT_THE_VASCULAR_WALL	0.0085979	23
FARMER_BREAST_CANCER_BASAL_VS_LULMINAL	0.00862158	65
RIGGI_EWING_SARCOMA_PROGENITOR_DN	0.0088337	40
DELYS_THYROID_CANCER_DN	0.00889659	49
VANTVEER_BREAST_CANCER_ESR1_UP	0.00889659	38
CHASSOT_SKIN_WOUND	0.00891846	6
MANN_RESPONSE_TO_AMIFOSTINE_DN	0.00891846	6
BOYLAN_MULTIPLE_MYELOMA_C_DN	0.00896947	17
HOFFMANN_LARGE_TO_SMALL_PRE_BII_LYMPHOCYTE_UP	0.00935793	37
KANG_IMMORTALIZED_BY_TERT_DN	0.00935793	26
LEE_EARLY_T_LYMPHOCYTE_UP	0.00935793	26
NABA_CORE_MATRISOME	0.00935793	57
BAKKER_FOXO3_TARGETS_UP	0.00936387	18
NADLER_OBESITY_UP	0.00936387	18
GNATENKO_PLATELET_SIGNATURE	0.00938207	15
ZHAN_MULTIPLE_MYELOMA_MS_UP	0.00938207	15
SENESE_HDAC1_TARGETS_UP	0.00947188	83
TENEDINI_MEGAKARYOCYTE_MARKERS	0.00963523	19
BROCKE_APOPTOSIS_REVERSED_BY_IL6	0.00965187	34
DARWICHE_PAPILLOMA_RISK_HIGH_UP	0.00965187	34
GAVIN_FOXP3_TARGETS_CLUSTER_T4	0.00965187	24
MORI_IMMATURE_B_LYMPHOCYTE_DN	0.00965187	24
KEGG_VEGF_SIGNALING_PATHWAY	0.0097283	21
PIONTEK_PKD1_TARGETS_DN	0.0097283	8
RHEIN_ALL_GLUCOCORTICOID_THERAPY_UP	0.0097283	21
SAKAI_TUMOR_INFILTRATING_MONOCYTES_DN	0.0097283	22
SIMBULAN_PARP1_TARGETS_DN	0.0097283	8
ZHONG_SECRETOME_OF_LUNG_CANCER_AND_MACROPHAGE	0.0097283	21
PLASARI_TGFB1_SIGNALING_VIA_NFIC_1HR_UP	0.00976238	12
REACTOME_SIGNALING_BY_RHO_GTPASES	0.00976238	28
SCHOEN_NFKB_SIGNALING	0.00976238	12
VALK_AML_CLUSTER_5	0.00976238	12
HENDRICKS_SMARCA4_TARGETS_DN	0.00989779	16
MARKEY_RB1_ACUTE_LOF_DN	0.00989779	48
ZHOU_TNF_SIGNALING_30MIN	0.00989779	16
KARLSSON_TGFB1_TARGETS_UP	0.0101587	30
AMIT_EGF_RESPONSE_40_HELA	0.0102655	14
LU_TUMOR_ANGIOGENESIS_UP	0.0107273	10
REACTOME_TRANSCRIPTION	0.0107273	44
REACTOME_DEVELOPMENTAL_BIOLOGY	0.0108947	75
PETROVA_ENDOTHELIUM_LYMPHATIC_VS_BLOOD_UP	0.0109563	31
KEGG_PATHWAYS_IN_CANCER	0.0109676	65
MARKEY_RB1_CHRONIC_LOF_UP	0.0109676	28
VANTVEER_BREAST_CANCER_METASTASIS_DN	0.0109676	28
ALONSO_METASTASIS_UP	0.0109894	42
SETLUR_PROSTATE_CANCER_TMPRSS2_ERG_FUSION_UP	0.0110793	19
TAKEDA_TARGETS_OF_NUP98_HOXA9_FUSION_6HR_UP	0.0111494	22
SESTO_RESPONSE_TO_UV_C8	0.0111809	20
HADDAD_T_LYMPHOCYTE_AND_NK_PROGENITOR_UP	0.0111811	21
BILANGES_RAPAMYCIN_SENSITIVE_GENES	0.0112834	13
DOANE_BREAST_CANCER_ESR1_UP	0.0112834	27
REACTOME_NETRIN1_SIGNALING	0.0112834	13
TARTE_PLASMA_CELL_VS_PLASMABLAST_DN	0.0115207	62
FARMER_BREAST_CANCER_APOCRINE_VS_LUMINAL	0.0115413	63
SARRIO_EPITHELIAL_MESENCHYMAL_TRANSITION_UP	0.0118992	39
CHIARADONNA_NEOPLASTIC_TRANSFORMATION_KRAS_DN	0.0122979	33
ZHANG_TLX_TARGETS_36HR_UP	0.0124363	47
FONTAINE_THYROID_TUMOR_UNCERTAIN_MALIGNANCY_UP	0.0124759	12
FERRANDO_T_ALL_WITH_MLL_ENL_FUSION_DN	0.0126719	23
KIM_WT1_TARGETS_12HR_UP	0.0127338	36
LAIHO_COLORECTAL_CANCER_SERRATED_UP	0.0127338	27
MATTIOLI_MGUS_VS_PCL	0.0127338	27
NAKAMURA_ADIPOGENESIS_EARLY_UP	0.0127338	18
RODRIGUES_THYROID_CARCINOMA_ANAPLASTIC_DN	0.0127338	91
WANG_HCP_PROSTATE_CANCER	0.0127338	27
COATES_MACROPHAGE_M1_VS_M2_UP	0.0127894	21
FOSTER_TOLERANT_MACROPHAGE_UP	0.0127894	34
HUANG_GATA2_TARGETS_UP	0.0127894	34
LIEN_BREAST_CARCINOMA_METAPLASTIC_VS_DUCTAL_UP	0.0127894	21
LINDSTEDT_DENDRITIC_CELL_MATURATION_C	0.0127894	19
MCBRYAN_PUBERTAL_BREAST_6_7WK_DN	0.0127894	21
KOBAYASHI_EGFR_SIGNALING_24HR_DN	0.0130118	51
WANG_IMMORTALIZED_BY_HOXA9_AND_MEIS1_UP	0.0132853	11
COULOUARN_TEMPORAL_TGFB1_SIGNATURE_DN	0.0133484	31
ACEVEDO_LIVER_TUMOR_VS_NORMAL_ADJACENT_TISSUE_DN	0.0134426	54
PASQUALUCCI_LYMPHOMA_BY_GC_STAGE_UP	0.0135284	55
ZHENG_BOUND_BY_FOXP3	0.0135284	89
WHITEFORD_PEDIATRIC_CANCER_MARKERS	0.0136149	28
BENPORATH_OCT4_TARGETS	0.0136849	57
BLUM_RESPONSE_TO_SALIRASIB_UP	0.0138374	50
GERY_CEBP_TARGETS	0.0138566	30
PASQUALUCCI_LYMPHOMA_BY_GC_STAGE_DN	0.0138566	36
SESTO_RESPONSE_TO_UV_C6	0.0138566	13
ZUCCHI_METASTASIS_UP	0.0138566	13
CHEMNITZ_RESPONSE_TO_PROSTAGLANDIN_E2_UP	0.0139897	32
KRIEG_HYPOXIA_VIA_KDM3A	0.0139949	16
HUMMERICH_SKIN_CANCER_PROGRESSION_UP	0.0140793	23
WINTER_HYPOXIA_UP	0.0140793	23
CHEOK_RESPONSE_TO_HD_MTX_UP	0.014084	9
GRAHAM_CML_QUIESCENT_VS_NORMAL_QUIESCENT_UP	0.0143907	22
GRAHAM_CML_QUIESCENT_VS_CML_DIVIDING_DN	0.0144214	6
MARTINELLI_IMMATURE_NEUTROPHIL_UP	0.0144214	6
ASTON_MAJOR_DEPRESSIVE_DISORDER_DN	0.0144889	35
WESTON_VEGFA_TARGETS	0.0145092	26
BLUM_RESPONSE_TO_SALIRASIB_DN	0.0145393	67
CHANG_IMMORTALIZED_BY_HPV31_DN	0.0145393	18
PID_IL12_2PATHWAY	0.0145393	18
WILCOX_RESPONSE_TO_PROGESTERONE_UP	0.0145393	33
SMID_BREAST_CANCER_RELAPSE_IN_BONE_DN	0.014558	62
HOSHIDA_LIVER_CANCER_SURVIVAL_UP	0.0145631	20
MARTINEZ_RESPONSE_TO_TRABECTEDIN_UP	0.014576	19
NUTT_GBM_VS_AO_GLIOMA_DN	0.0149066	14
LU_AGING_BRAIN_UP	0.0150376	53
SEMENZA_HIF1_TARGETS	0.0151444	12
REACTOME_HEMOSTASIS	0.0152922	85
WANG_SMARCE1_TARGETS_DN	0.0152922	69
PUJANA_XPRSS_INT_NETWORK	0.0154607	37
PASINI_SUZ12_TARGETS_DN	0.0154982	62
MIYAGAWA_TARGETS_OF_EWSR1_ETS_FUSIONS_DN	0.015552	44
CHICAS_RB1_TARGETS_LOW_SERUM	0.0158416	23
ZHANG_RESPONSE_TO_IKK_INHIBITOR_AND_TNF_UP	0.0161571	46
NABA_ECM_GLYCOPROTEINS	0.0162716	42
CREIGHTON_ENDOCRINE_THERAPY_RESISTANCE_4	0.0164699	57
GENTILE_UV_RESPONSE_CLUSTER_D4	0.0164699	16
DARWICHE_SQUAMOUS_CELL_CARCINOMA_UP	0.0169439	32
BYSTROEM_CORRELATED_WITH_IL5_DN	0.0169829	18
PID_AP1_PATHWAY	0.0169829	19
RHODES_CANCER_META_SIGNATURE	0.0169829	18
GAVIN_FOXP3_TARGETS_CLUSTER_P4	0.0174759	24
GAVIN_FOXP3_TARGETS_CLUSTER_T7	0.0174759	24
BARRIER_CANCER_RELAPSE_TUMOR_SAMPLE_UP	0.0177327	7
IZADPANAH_STEM_CELL_ADIPOSE_VS_BONE_UP	0.0177738	29
DAZARD_UV_RESPONSE_CLUSTER_G24	0.0179349	10
BEGUM_TARGETS_OF_PAX3_FOXO1_FUSION_DN	0.0180406	14
KEGG_DILATED_CARDIOMYOPATHY	0.0180406	23
ODONNELL_TARGETS_OF_MYC_AND_TFRC_DN	0.0180406	14
ZHAN_MULTIPLE_MYELOMA_HP_UP	0.0180406	14
RIGGINS_TAMOXIFEN_RESISTANCE_DN	0.0186138	45
HUTTMANN_B_CLL_POOR_SURVIVAL_UP	0.0186949	54
NEWMAN_ERCC6_TARGETS_UP	0.0187528	9
OSADA_ASCL1_TARGETS_DN	0.0187528	9
APPIERTO_RESPONSE_TO_FENRETINIDE_DN	0.0187542	15
MAHADEVAN_RESPONSE_TO_MP470_DN	0.0187542	8
NIELSEN_LIPOSARCOMA_DN	0.0187542	8
REACTOME_CHONDROITIN_SULFATE_BIOSYNTHESIS	0.0187542	8
SESTO_RESPONSE_TO_UV_C3	0.0187542	8
ZHANG_PROLIFERATING_VS_QUIESCENT	0.0187542	15
DARWICHE_PAPILLOMA_RISK_LOW_UP	0.0187929	35
ODONNELL_TARGETS_OF_MYC_AND_TFRC_UP	0.0187929	21
CHANG_CORE_SERUM_RESPONSE_DN	0.0189018	42
ALFANO_MYC_TARGETS	0.0189994	48
DACOSTA_UV_RESPONSE_VIA_ERCC3_COMMON_UP	0.0190983	20
SPIELMAN_LYMPHOBLAST_EUROPEAN_VS_ASIAN_UP	0.0190983	87
YAGI_AML_WITH_T_8_21_TRANSLOCATION	0.0190983	69
COLINA_TARGETS_OF_4EBP1_AND_4EBP2	0.0191621	68
ZHONG_RESPONSE_TO_AZACITIDINE_AND_TSA_UP	0.0191621	39
KIM_WT1_TARGETS_8HR_UP	0.0192731	36
GRAHAM_NORMAL_QUIESCENT_VS_NORMAL_DIVIDING_UP	0.0192964	18
KEGG_NOD_LIKE_RECEPTOR_SIGNALING_PATHWAY	0.0192964	17
LEE_LIVER_CANCER_CIPROFIBRATE_UP	0.0192964	17
RIGGINS_TAMOXIFEN_RESISTANCE_UP	0.0192964	18
COLDREN_GEFITINIB_RESISTANCE_DN	0.0195998	45
MUELLER_PLURINET	0.0196148	59
GROSS_HYPOXIA_VIA_HIF1A_DN	0.0199069	26
LI_LUNG_CANCER	0.0200554	13
MALONEY_RESPONSE_TO_17AAG_UP	0.0200554	13
ONO_FOXP3_TARGETS_DN	0.0200554	13
SENESE_HDAC2_TARGETS_DN	0.0201542	28
ALCALA_APOPTOSIS	0.0204323	22
APPEL_IMATINIB_RESPONSE	0.0204323	11
GHANDHI_DIRECT_IRRADIATION_DN	0.0204323	11
KIM_WT1_TARGETS_12HR_DN	0.0204323	43
SASSON_RESPONSE_TO_GONADOTROPHINS_DN	0.0204323	22
GHANDHI_DIRECT_IRRADIATION_UP	0.0206282	25
LENAOUR_DENDRITIC_CELL_MATURATION_UP	0.0209519	27
MARKEY_RB1_CHRONIC_LOF_DN	0.0209519	27
ONDER_CDH1_TARGETS_1_UP	0.0209519	31
PROVENZANI_METASTASIS_DN	0.0209519	31
SANA_TNF_SIGNALING_UP	0.0209519	21
ZHENG_FOXP3_TARGETS_IN_THYMUS_UP	0.0209519	40
BOYLAN_MULTIPLE_MYELOMA_PCA1_UP	0.0214366	24
WANG_CISPLATIN_RESPONSE_AND_XPC_UP	0.0217461	42
BOYERINAS_ONCOFETAL_TARGETS_OF_LET7A1	0.0217803	6
CHAUHAN_RESPONSE_TO_METHOXYESTRADIOL_UP	0.0217803	15
GHANDHI_BYSTANDER_IRRADIATION_DN	0.0217803	6
NEBEN_AML_WITH_FLT3_OR_NRAS_DN	0.0217803	6
PEDERSEN_TARGETS_OF_611CTF_ISOFORM_OF_ERBB2	0.0217803	19
REACTOME_SIGNAL_REGULATORY_PROTEIN_SIRP_FAMILY_INTERACTIONS	0.0217803	6
LINDGREN_BLADDER_CANCER_CLUSTER_1_UP	0.021826	26
ZHANG_TLX_TARGETS_UP	0.021826	26
AKL_HTLV1_INFECTION_DN	0.0218386	18
BORLAK_LIVER_CANCER_EGF_UP	0.0218386	16
FONTAINE_FOLLICULAR_THYROID_ADENOMA_DN	0.0218386	18
REACTOME_SEMAPHORIN_INTERACTIONS	0.0218386	18
SHAFFER_IRF4_TARGETS_IN_PLASMA_CELL_VS_MATURE_B_LYMPHOCYTE	0.0218386	18
DAVIES_MULTIPLE_MYELOMA_VS_MGUS_DN	0.0218717	10
KRIGE_AMINO_ACID_DEPRIVATION	0.0218717	10
ST_P38_MAPK_PATHWAY	0.0221769	12
IZADPANAH_STEM_CELL_ADIPOSE_VS_BONE_DN	0.022736	25
RUIZ_TNC_TARGETS_DN	0.02278	31
IVANOVA_HEMATOPOIESIS_STEM_CELL	0.0230484	50
SCHLOSSER_MYC_TARGETS_REPRESSED_BY_SERUM	0.0230484	34
REACTOME_CYTOKINE_SIGNALING_IN_IMMUNE_SYSTEM	0.0232551	53
DALESSIO_TSA_RESPONSE	0.0235501	9
LIAN_NEUTROPHIL_GRANULE_CONSTITUENTS	0.0235501	9
MISHRA_CARCINOMA_ASSOCIATED_FIBROBLAST_UP	0.0235501	9
LIU_TARGETS_OF_VMYB_VS_CMYB_DN	0.0237509	13
AZARE_NEOPLASTIC_TRANSFORMATION_BY_STAT3_DN	0.0242123	7
GARGALOVIC_RESPONSE_TO_OXIDIZED_PHOSPHOLIPIDS_GREY_UP	0.0242123	7
REACTOME_INFLAMMASOMES	0.0242123	7
RODRIGUES_DCC_TARGETS_DN	0.0242123	28
DELLA_RESPONSE_TO_TSA_AND_BUTYRATE	0.0243609	8
HOSHIDA_LIVER_CANCER_SUBCLASS_S1	0.0243609	48
KEGG_BIOSYNTHESIS_OF_UNSATURATED_FATTY_ACIDS	0.0243609	8
REACTOME_METABOLISM_OF_CARBOHYDRATES	0.0243609	48
TORCHIA_TARGETS_OF_EWSR1_FLI1_FUSION_TOP20_UP	0.0243609	8
ABE_INNER_EAR	0.0244452	14
BOYLAN_MULTIPLE_MYELOMA_D_DN	0.0244452	19
FAELT_B_CLL_WITH_VH_REARRANGEMENTS_UP	0.0244452	14
HOFFMANN_PRE_BI_TO_LARGE_PRE_BII_LYMPHOCYTE_DN	0.0244452	19
NOUSHMEHR_GBM_SILENCED_BY_METHYLATION	0.0244452	14
BENPORATH_NOS_TARGETS	0.024526	37
BURTON_ADIPOGENESIS_1	0.024526	11
GROSS_HYPOXIA_VIA_ELK3_ONLY_UP	0.024526	11
JIANG_HYPOXIA_VIA_VHL	0.024526	11
BENPORATH_PROLIFERATION	0.0245529	31
BROWNE_HCMV_INFECTION_8HR_UP	0.024791	25
LIN_SILENCED_BY_TUMOR_MICROENVIRONMENT	0.024791	25
ROSS_AML_WITH_CBFB_MYH11_FUSION	0.024791	15
ZHENG_IL22_SIGNALING_UP	0.024791	15
MOHANKUMAR_TLX1_TARGETS_DN	0.0247936	38
MORI_LARGE_PRE_BII_LYMPHOCYTE_DN	0.0249653	16
SASSON_RESPONSE_TO_FORSKOLIN_UP	0.0250729	22
BOYLAN_MULTIPLE_MYELOMA_C_D_UP	0.0260039	30
KEGG_HYPERTROPHIC_CARDIOMYOPATHY_HCM	0.0260872	21
REACTOME_EXTRACELLULAR_MATRIX_ORGANIZATION	0.0260872	21
SMIRNOV_RESPONSE_TO_IR_6HR_DN	0.0263646	26
GRUETZMANN_PANCREATIC_CANCER_DN	0.0263874	42
GAUSSMANN_MLL_AF4_FUSION_TARGETS_F_UP	0.0269269	38
HERNANDEZ_ABERRANT_MITOSIS_BY_DOCETACEL_2NM_UP	0.0269269	20
JISON_SICKLE_CELL_DISEASE_UP	0.0269269	38
LINDVALL_IMMORTALIZED_BY_TERT_DN	0.0269269	20
CHIARETTI_T_ALL_REFRACTORY_TO_THERAPY	0.0270453	10
DAZARD_UV_RESPONSE_CLUSTER_G2	0.0270453	10
GENTILE_UV_HIGH_DOSE_DN	0.0270453	59
MARSHALL_VIRAL_INFECTION_RESPONSE_DN	0.0270453	10
YU_BAP1_TARGETS	0.0270453	10
ELVIDGE_HIF1A_TARGETS_DN	0.0283146	22
GAVIN_FOXP3_TARGETS_CLUSTER_P6	0.0283146	22
SESTO_RESPONSE_TO_UV_C7	0.0283281	18
KOHOUTEK_CCNT1_TARGETS	0.0287535	14
SMIRNOV_RESPONSE_TO_IR_2HR_UP	0.0287535	14
LEE_LIVER_CANCER_ACOX1_UP	0.0288065	17
DASU_IL6_SIGNALING_UP	0.02889	16
ISSAEVA_MLL2_TARGETS	0.02889	16
LINDSTEDT_DENDRITIC_CELL_MATURATION_B	0.02889	15
PID_ATF2_PATHWAY	0.02889	16
REACTOME_CELL_DEATH_SIGNALLING_VIA_NRAGE_NRIF_AND_NADE	0.02889	16
WATTEL_AUTONOMOUS_THYROID_ADENOMA_DN	0.02889	15
COLLER_MYC_TARGETS_UP	0.0295224	9
FONTAINE_THYROID_TUMOR_UNCERTAIN_MALIGNANCY_DN	0.0295224	9
KIM_HYPOXIA	0.0295224	9
LEE_DOUBLE_POLAR_THYMOCYTE	0.0295224	9
PID_TOLL_ENDOGENOUS_PATHWAY	0.0295224	9
XU_HGF_SIGNALING_NOT_VIA_AKT1_48HR_UP	0.0298802	11
FRASOR_RESPONSE_TO_ESTRADIOL_DN	0.0302914	20
REACTOME_SIGNALING_BY_PDGF	0.0303752	27
ACEVEDO_FGFR1_TARGETS_IN_PROSTATE_CANCER_MODEL_DN	0.0305485	58
OKUMURA_INFLAMMATORY_RESPONSE_LPS	0.0308378	37
PID_P53_DOWNSTREAM_PATHWAY	0.0309992	30
AMIT_EGF_RESPONSE_20_MCF10A	0.0312095	6
LEE_SP4_THYMOCYTE	0.0312095	6
TURASHVILI_BREAST_LOBULAR_CARCINOMA_VS_LOBULAR_NORMAL_DN	0.0312095	19
WANG_RESPONSE_TO_PACLITAXEL_VIA_MAPK8_UP	0.0312095	6
BIOCARTA_IL12_PATHWAY	0.0314333	8
GESERICK_TERT_TARGETS_DN	0.0314333	8
MARCHINI_TRABECTEDIN_RESISTANCE_UP	0.0314333	8
PID_P38_MK2_PATHWAY	0.0314333	8
WEST_ADRENOCORTICAL_TUMOR_MARKERS_UP	0.0314333	8
AMUNDSON_POOR_SURVIVAL_AFTER_GAMMA_RADIATION_2G	0.0321024	35
HAN_SATB1_TARGETS_UP	0.0321595	71
INGA_TP53_TARGETS	0.0323378	7
LEE_NAIVE_T_LYMPHOCYTE	0.0323378	7
MORI_EMU_MYC_LYMPHOMA_BY_ONSET_TIME_DN	0.0323378	7
ONDER_CDH1_TARGETS_3_UP	0.0323378	7
CHARAFE_BREAST_CANCER_LUMINAL_VS_MESENCHYMAL_UP	0.0326301	78
KUROZUMI_RESPONSE_TO_ONCOCYTIC_VIRUS	0.0326769	13
TONKS_TARGETS_OF_RUNX1_RUNX1T1_FUSION_SUSTAINDED_IN_ERYTHROCYTE_UP	0.0326769	13
BOGNI_TREATMENT_RELATED_MYELOID_LEUKEMIA_UP	0.0330111	10
BOYAULT_LIVER_CANCER_SUBCLASS_G23_UP	0.0330111	14
BOYLAN_MULTIPLE_MYELOMA_C_CLUSTER_DN	0.0330111	10
BROWNE_HCMV_INFECTION_12HR_DN	0.0330111	23
CAFFAREL_RESPONSE_TO_THC_DN	0.0330111	10
CHIARADONNA_NEOPLASTIC_TRANSFORMATION_KRAS_CDC25_DN	0.0330111	14
DANG_REGULATED_BY_MYC_DN	0.0330111	49
LI_PROSTATE_CANCER_EPIGENETIC	0.0330111	10
MORI_PLASMA_CELL_DN	0.0330111	10
ZHANG_ANTIVIRAL_RESPONSE_TO_RIBAVIRIN_UP	0.0330111	10
SERVITJA_ISLET_HNF1A_TARGETS_DN	0.0330554	25
SESTO_RESPONSE_TO_UV_C0	0.0330554	25
LEIN_CEREBELLUM_MARKERS	0.0334337	20
ROSS_ACUTE_MYELOID_LEUKEMIA_CBF	0.0334337	20
WONG_EMBRYONIC_STEM_CELL_CORE	0.0343539	63
REACTOME_SIGNALLING_BY_NGF	0.0345922	43
MULLIGHAN_NPM1_MUTATED_SIGNATURE_2_DN	0.034778	19
OSWALD_HEMATOPOIETIC_STEM_CELL_IN_COLLAGEN_GEL_DN	0.034778	51
WOO_LIVER_CANCER_RECURRENCE_UP	0.0349063	24
KEGG_PRION_DISEASES	0.0357966	11
MODY_HIPPOCAMPUS_NEONATAL	0.0357966	11
WANG_METHYLATED_IN_BREAST_CANCER	0.0357966	11
HOFFMANN_SMALL_PRE_BII_TO_IMMATURE_B_LYMPHOCYTE_UP	0.0358683	18
SCHAEFFER_PROSTATE_DEVELOPMENT_48HR_UP	0.0358683	84
WESTON_VEGFA_TARGETS_3HR	0.0358683	18
IWANAGA_CARCINOGENESIS_BY_KRAS_DN	0.0360407	27
SANSOM_APC_TARGETS_UP	0.0360407	27
ACEVEDO_FGFR1_TARGETS_IN_PROSTATE_CANCER_MODEL_UP	0.0364745	54
RIZKI_TUMOR_INVASIVENESS_3D_UP	0.0365688	41
WANG_ADIPOGENIC_GENES_REPRESSED_BY_SIRT1	0.0367097	9
DAZARD_UV_RESPONSE_CLUSTER_G1	0.0367116	17
GENTILE_UV_LOW_DOSE_DN	0.0367116	17
HOWLIN_PUBERTAL_MAMMARY_GLAND	0.0367116	17
BOQUEST_STEM_CELL_DN	0.0367641	43
ZHENG_GLIOBLASTOMA_PLASTICITY_UP	0.036981	48
TOMLINS_PROSTATE_CANCER_DN	0.0371618	12
LEE_LIVER_CANCER_MYC_TGFA_UP	0.0375273	16
KYNG_RESPONSE_TO_H2O2_VIA_ERCC6_DN	0.0380784	13
SCHLOSSER_MYC_TARGETS_AND_SERUM_RESPONSE_DN	0.0380784	13
AMUNDSON_POOR_SURVIVAL_AFTER_GAMMA_RADIATION_8G	0.0381756	22
FLECHNER_PBL_KIDNEY_TRANSPLANT_REJECTED_VS_OK_DN	0.0381756	14
ISHIDA_E2F_TARGETS	0.0381756	14
LU_IL4_SIGNALING	0.0381756	22
REACTOME_ACTIVATED_TLR4_SIGNALLING	0.0381756	22
RICKMAN_TUMOR_DIFFERENTIATED_WELL_VS_MODERATELY_UP	0.0382554	24
GAVIN_FOXP3_TARGETS_CLUSTER_P3	0.0384633	33
PID_P73PATHWAY	0.0388258	19
REACTOME_UNFOLDED_PROTEIN_RESPONSE	0.0388258	19
TOOKER_GEMCITABINE_RESISTANCE_DN	0.0392374	27
ZHU_CMV_ALL_UP	0.0392374	27
BIOCARTA_SARS_PATHWAY	0.0393047	5
REACTOME_RECRUITMENT_OF_NUMA_TO_MITOTIC_CENTROSOMES	0.0393047	5
REACTOME_ROLE_OF_DCC_IN_REGULATING_APOPTOSIS	0.0393047	5
GAUSSMANN_MLL_AF4_FUSION_TARGETS_E_DN	0.0397505	8
LU_TUMOR_ENDOTHELIAL_MARKERS_UP	0.0397505	8
SASSON_RESPONSE_TO_FORSKOLIN_DN	0.0398508	21
DORSEY_GAB2_TARGETS	0.0399301	10
PID_P38_ALPHA_BETA_PATHWAY	0.0399301	10
ROZANOV_MMP14_TARGETS_SUBSET	0.0399301	10
VALK_AML_CLUSTER_3	0.0399301	10
WINZEN_DEGRADED_VIA_KHSRP	0.0399745	23
BHATI_G2M_ARREST_BY_2METHOXYESTRADIOL_DN	0.040189	28
NAKAMURA_TUMOR_ZONE_PERIPHERAL_VS_CENTRAL_UP	0.0405673	53
KAAB_HEART_ATRIUM_VS_VENTRICLE_UP	0.0416072	48
REACTOME_MYD88_MAL_CASCADE_INITIATED_ON_PLASMA_MEMBRANE	0.0416731	20
DUTERTRE_ESTRADIOL_RESPONSE_6HR_UP	0.041732	44
HAHTOLA_SEZARY_SYNDROM_UP	0.0420806	22
MARZEC_IL2_SIGNALING_DN	0.0420806	11
NIELSEN_GIST	0.0420806	22
PEDRIOLI_MIR31_TARGETS_DN	0.0420806	71
PID_PI3K_PLC_TRK_PATHWAY	0.0420806	11
SUBTIL_PROGESTIN_TARGETS	0.0420806	11
VANHARANTA_UTERINE_FIBROID_WITH_7Q_DELETION_DN	0.0420806	11
YIH_RESPONSE_TO_ARSENITE_C3	0.0420806	11
ZHU_CMV_24_HR_UP	0.0420806	22
CROMER_TUMORIGENESIS_UP	0.0421442	16
REN_BOUND_BY_E2F	0.0421442	16
WATANABE_ULCERATIVE_COLITIS_WITH_CANCER_DN	0.0425097	6
DAVICIONI_MOLECULAR_ARMS_VS_ERMS_UP	0.0426939	60
LEE_LIVER_CANCER_MYC_E2F1_UP	0.0429838	15
MCCLUNG_CREB1_TARGETS_DN	0.0429838	15
MEISSNER_NPC_HCP_WITH_H3K4ME2	0.0429838	85
WIEDERSCHAIN_TARGETS_OF_BMI1_AND_PCGF2	0.0429838	15
NAKAYAMA_FRA2_TARGETS	0.0431869	12
PRAMOONJAGO_SOX4_TARGETS_UP	0.043446	14
VILIMAS_NOTCH1_TARGETS_UP	0.043446	14
YAGI_AML_WITH_11Q23_REARRANGED	0.043446	63
PID_SYNDECAN_1_PATHWAY	0.0435537	13
LINDGREN_BLADDER_CANCER_CLUSTER_1_DN	0.0436207	67
SASSON_RESPONSE_TO_GONADOTROPHINS_UP	0.0436507	21
SHAFFER_IRF4_TARGETS_IN_MYELOMA_VS_MATURE_B_LYMPHOCYTE	0.0436507	23
MULLIGHAN_NPM1_SIGNATURE_3_DN	0.0441475	33
DACOSTA_ERCC3_ALLELE_XPCS_VS_TTD_UP	0.0442364	9
KAMIKUBO_MYELOID_CEBPA_NETWORK	0.0442364	9
OLSSON_E2F3_TARGETS_UP	0.0442364	9
REACTOME_GLYCOLYSIS	0.0442364	9
REACTOME_SIGNALLING_TO_RAS	0.0442364	9
WATANABE_COLON_CANCER_MSI_VS_MSS_UP	0.0442364	9
WANG_LMO4_TARGETS_UP	0.0449953	64
ZHOU_INFLAMMATORY_RESPONSE_FIMA_UP	0.0459295	86
CHIARADONNA_NEOPLASTIC_TRANSFORMATION_KRAS_UP	0.0460254	27
ABE_VEGFA_TARGETS_2HR	0.0476038	10
CAFFAREL_RESPONSE_TO_THC_24HR_5_UP	0.0476038	10
DIRMEIER_LMP1_RESPONSE_LATE_DN	0.0476038	10
GREENBAUM_E2A_TARGETS_UP	0.0476038	10
HELLEBREKERS_SILENCED_DURING_TUMOR_ANGIOGENESIS	0.0476038	19
LIANG_HEMATOPOIESIS_STEM_CELL_NUMBER_SMALL_VS_HUGE_DN	0.0476038	10
MODY_HIPPOCAMPUS_POSTNATAL	0.0476038	16
PID_INTEGRIN_A4B1_PATHWAY	0.0476038	10
PID_NETRIN_PATHWAY	0.0476038	10
PID_SYNDECAN_4_PATHWAY	0.0476038	10
TSAI_RESPONSE_TO_RADIATION_THERAPY	0.0476038	10
TURASHVILI_BREAST_NORMAL_DUCTAL_VS_LOBULAR_UP	0.0476038	16
VANTVEER_BREAST_CANCER_BRCA1_UP	0.0476038	10
WONG_ENDMETRIUM_CANCER_DN	0.0476038	19
PID_CXCR4_PATHWAY	0.0478886	23
DARWICHE_SKIN_TUMOR_PROMOTER_UP	0.0479652	29
MORI_MATURE_B_LYMPHOCYTE_UP	0.0481287	21
DAVICIONI_PAX_FOXO1_SIGNATURE_IN_ARMS_UP	0.0485878	15
KEGG_ACUTE_MYELOID_LEUKEMIA	0.0485878	15
ZHENG_GLIOBLASTOMA_PLASTICITY_DN	0.0485878	15
GOZGIT_ESR1_TARGETS_UP	0.0487836	30
WHITFIELD_CELL_CYCLE_M_G1	0.0487836	30
AZARE_STAT3_TARGETS	0.0488848	8
FERRANDO_HOX11_NEIGHBORS	0.0488848	8
HERNANDEZ_ABERRANT_MITOSIS_BY_DOCETACEL_2NM_DN	0.0488848	8
PID_PRL_SIGNALING_EVENTS_PATHWAY	0.0488848	8
YIH_RESPONSE_TO_ARSENITE_C1	0.0488848	8
AMIT_EGF_RESPONSE_60_MCF10A	0.0488927	11
CASORELLI_APL_SECONDARY_VS_DE_NOVO_UP	0.0488927	11
KYNG_DNA_DAMAGE_BY_4NQO	0.0488927	11
SPIRA_SMOKERS_LUNG_CANCER_UP	0.0488927	11
HUPER_BREAST_BASAL_VS_LUMINAL_UP	0.0491245	14
SUNG_METASTASIS_STROMA_UP	0.0492138	24
BREDEMEYER_RAG_SIGNALING_VIA_ATM_NOT_VIA_NFKB_UP	0.0494869	13
LEONARD_HYPOXIA	0.0494869	13
PARENT_MTOR_SIGNALING_DN	0.0494869	12
PID_UPA_UPAR_PATHWAY	0.0494869	12
REACTOME_CHONDROITIN_SULFATE_DERMATAN_SULFATE_METABOLISM	0.0494869	13
HOEBEKE_LYMPHOID_STEM_CELL_DN	0.049742	20
HOOI_ST7_TARGETS_UP	0.049742	20
LEE_AGING_CEREBELLUM_UP	0.049742	20
MENSE_HYPOXIA_UP	0.049742	22
GO Biological Processes
ID	Description	p.adjust	Count
GO:0045047	protein targeting to ER	4.67e-40	73
GO:0006614	SRP-dependent cotranslational protein targeting to membrane	8.59e-40	70
GO:0072599	establishment of protein localization to endoplasmic reticulum	8.59e-40	74
GO:0006613	cotranslational protein targeting to membrane	6.87e-39	72
GO:0070972	protein localization to endoplasmic reticulum	2.63e-38	80
GO:0000184	nuclear-transcribed mRNA catabolic process, nonsense-mediated decay	4.91e-33	74
GO:0006413	translational initiation	8.7e-26	87
GO:0006612	protein targeting to membrane	2.88e-23	82
GO:0000956	nuclear-transcribed mRNA catabolic process	1.08e-22	84
GO:0006402	mRNA catabolic process	8.26e-21	85
GO:0019083	viral transcription	6.13e-19	74
GO:0019080	viral gene expression	1.79e-18	76
GO:0006401	RNA catabolic process	2.77e-18	88
GO:0044033	multi-organism metabolic process	2.11e-17	80
GO:0034655	nucleobase-containing compound catabolic process	2.51e-15	109
GO:0090150	establishment of protein localization to membrane	5.48e-15	106
GO:0046700	heterocycle catabolic process	6.31e-14	112
GO:0006364	rRNA processing	6.31e-14	84
GO:0019058	viral life cycle	6.31e-14	121
GO:0044270	cellular nitrogen compound catabolic process	2.13e-13	112
GO:0016072	rRNA metabolic process	2.56e-13	84
GO:0019439	aromatic compound catabolic process	9.13e-13	111
GO:1901361	organic cyclic compound catabolic process	8.2e-12	113
GO:0042254	ribosome biogenesis	9.67e-12	92
GO:0072657	protein localization to membrane	4.74e-11	120
GO:0022613	ribonucleoprotein complex biogenesis	1.05e-09	113
GO:0034470	ncRNA processing	1.83e-07	96
GO:0050900	leukocyte migration	6.69e-07	87
GO:0050707	regulation of cytokine secretion	8.33e-06	43
GO:0050715	positive regulation of cytokine secretion	2.14e-05	32
GO:0050663	cytokine secretion	2.27e-05	46
GO:0002274	myeloid leukocyte activation	2.27e-05	44
GO:0001819	positive regulation of cytokine production	4.4e-05	84
GO:0002683	negative regulation of immune system process	6.49e-05	81
GO:0060326	cell chemotaxis	7.06e-05	59
GO:0031099	regeneration	8.14e-05	44
GO:0030595	leukocyte chemotaxis	9.74e-05	48
GO:0002181	cytoplasmic translation	0.000102402	21
GO:0002521	leukocyte differentiation	0.000495673	93
GO:0009612	response to mechanical stimulus	0.000643803	48
GO:0010035	response to inorganic substance	0.000926529	92
GO:0070371	ERK1 and ERK2 cascade	0.00130117	57
GO:0032652	regulation of interleukin-1 production	0.00133856	21
GO:0050704	regulation of interleukin-1 secretion	0.00136731	14
GO:0050701	interleukin-1 secretion	0.00143349	16
GO:0042273	ribosomal large subunit biogenesis	0.00143844	22
GO:0032612	interleukin-1 production	0.00156738	23
GO:0030048	actin filament-based movement	0.00183687	32
GO:0032103	positive regulation of response to external stimulus	0.00188038	58
GO:0031100	animal organ regeneration	0.00191485	23
GO:0051056	regulation of small GTPase mediated signal transduction	0.00193123	62
GO:0042116	macrophage activation	0.0026272	19
GO:0050727	regulation of inflammatory response	0.0026272	63
GO:0002227	innate immune response in mucosa	0.00293931	11
GO:0032069	regulation of nuclease activity	0.00293931	11
GO:1904951	positive regulation of establishment of protein localization	0.00293931	96
GO:0050920	regulation of chemotaxis	0.00293931	43
GO:0070372	regulation of ERK1 and ERK2 cascade	0.00293931	53
GO:0006323	DNA packaging	0.00334889	46
GO:0043277	apoptotic cell clearance	0.00360255	14
GO:0071900	regulation of protein serine/threonine kinase activity	0.00380552	89
GO:0032651	regulation of interleukin-1 beta production	0.00380552	17
GO:0086003	cardiac muscle cell contraction	0.00380552	17
GO:0042255	ribosome assembly	0.00380552	19
GO:0006334	nucleosome assembly	0.00380552	36
GO:0043405	regulation of MAP kinase activity	0.00398213	66
GO:0002694	regulation of leukocyte activation	0.00427209	87
GO:2001233	regulation of apoptotic signaling pathway	0.00427209	74
GO:0050678	regulation of epithelial cell proliferation	0.00427209	60
GO:0007162	negative regulation of cell adhesion	0.00448976	48
GO:0002385	mucosal immune response	0.00449441	13
GO:0048010	vascular endothelial growth factor receptor signaling pathway	0.00449441	26
GO:0050865	regulation of cell activation	0.00449441	92
GO:0048514	blood vessel morphogenesis	0.0046668	93
GO:1902532	negative regulation of intracellular signal transduction	0.00544356	86
GO:0010594	regulation of endothelial cell migration	0.00544356	30
GO:0046824	positive regulation of nucleocytoplasmic transport	0.00544356	30
GO:0019674	NAD metabolic process	0.0054677	19
GO:0051271	negative regulation of cellular component movement	0.005611	54
GO:0086005	ventricular cardiac muscle cell action potential	0.00565542	11
GO:0086002	cardiac muscle cell action potential involved in contraction	0.00565542	14
GO:0043030	regulation of macrophage activation	0.00589344	12
GO:0001936	regulation of endothelial cell proliferation	0.00589344	26
GO:0007229	integrin-mediated signaling pathway	0.00591743	25
GO:0043406	positive regulation of MAP kinase activity	0.00591743	47
GO:0031497	chromatin assembly	0.00611734	38
GO:0030198	extracellular matrix organization	0.00654672	67
GO:2000116	regulation of cysteine-type endopeptidase activity	0.00658617	48
GO:0002688	regulation of leukocyte chemotaxis	0.00663577	26
GO:0086001	cardiac muscle cell action potential	0.00663577	17
GO:0043062	extracellular structure organization	0.00680214	67
GO:1902165	regulation of intrinsic apoptotic signaling pathway in response to DNA damage by p53 class mediator	0.00680214	8
GO:0001818	negative regulation of cytokine production	0.00689153	47
GO:0031349	positive regulation of defense response	0.00712326	77
GO:0071902	positive regulation of protein serine/threonine kinase activity	0.00712326	60
GO:0002251	organ or tissue specific immune response	0.0072999	13
GO:0061564	axon development	0.0072999	84
GO:0010952	positive regulation of peptidase activity	0.0072999	36
GO:0032731	positive regulation of interleukin-1 beta production	0.0072999	12
GO:0071353	cellular response to interleukin-4	0.0072999	12
GO:0046631	alpha-beta T cell activation	0.00738102	29
GO:0040013	negative regulation of locomotion	0.00749454	53
GO:2001056	positive regulation of cysteine-type endopeptidase activity	0.00753913	31
GO:0051272	positive regulation of cellular component movement	0.00789119	79
GO:0043122	regulation of I-kappaB kinase/NF-kappaB signaling	0.00800334	50
GO:0030336	negative regulation of cell migration	0.00848405	46
GO:0040017	positive regulation of locomotion	0.00902467	79
GO:0050673	epithelial cell proliferation	0.00915348	67
GO:0045860	positive regulation of protein kinase activity	0.00915348	86
GO:0006941	striated muscle contraction	0.00931883	35
GO:0050729	positive regulation of inflammatory response	0.00931883	29
GO:0060048	cardiac muscle contraction	0.00931883	29
GO:1990267	response to transition metal nanoparticle	0.00935309	31
GO:0086091	regulation of heart rate by cardiac conduction	0.00935309	12
GO:0030098	lymphocyte differentiation	0.00935309	62
GO:0032611	interleukin-1 beta production	0.00954035	18
GO:0001938	positive regulation of endothelial cell proliferation	0.0100739	20
GO:0002367	cytokine production involved in immune response	0.0100739	21
GO:0031589	cell-substrate adhesion	0.0100739	61
GO:1903727	positive regulation of phospholipid metabolic process	0.0103987	14
GO:0042307	positive regulation of protein import into nucleus	0.0106776	25
GO:0070252	actin-mediated cell contraction	0.0106776	25
GO:0001935	endothelial cell proliferation	0.0106776	28
GO:0006986	response to unfolded protein	0.0110336	38
GO:0050714	positive regulation of protein secretion	0.0111874	45
GO:0006636	unsaturated fatty acid biosynthetic process	0.0111874	18
GO:0002237	response to molecule of bacterial origin	0.0111874	62
GO:0006342	chromatin silencing	0.0112806	29
GO:0033674	positive regulation of kinase activity	0.0113239	90
GO:0070486	leukocyte aggregation	0.0113239	83
GO:0006979	response to oxidative stress	0.0113239	72
GO:0097529	myeloid leukocyte migration	0.0119999	35
GO:0051222	positive regulation of protein transport	0.0120135	83
GO:0050706	regulation of interleukin-1 beta secretion	0.0120834	11
GO:0000027	ribosomal large subunit assembly	0.0120834	10
GO:0050716	positive regulation of interleukin-1 secretion	0.0120834	10
GO:1903707	negative regulation of hemopoiesis	0.0122768	31
GO:2000147	positive regulation of cell motility	0.0122768	76
GO:2000146	negative regulation of cell motility	0.0128676	47
GO:0032602	chemokine production	0.0128882	21
GO:0051090	regulation of sequence-specific DNA binding transcription factor activity	0.0130615	70
GO:1904591	positive regulation of protein import	0.0131214	25
GO:0032732	positive regulation of interleukin-1 production	0.013599	13
GO:0034728	nucleosome organization	0.0139283	38
GO:0010810	regulation of cell-substrate adhesion	0.0141706	39
GO:0035966	response to topologically incorrect protein	0.0143607	40
GO:0043281	regulation of cysteine-type endopeptidase activity involved in apoptotic process	0.0145233	42
GO:0006335	DNA replication-dependent nucleosome assembly	0.0145233	12
GO:0034723	DNA replication-dependent nucleosome organization	0.0145233	12
GO:0070670	response to interleukin-4	0.0145233	12
GO:0070373	negative regulation of ERK1 and ERK2 cascade	0.0145233	17
GO:0051259	protein oligomerization	0.0146815	84
GO:0007159	leukocyte cell-cell adhesion	0.0151749	87
GO:0010950	positive regulation of endopeptidase activity	0.0154746	32
GO:0033559	unsaturated fatty acid metabolic process	0.0160497	28
GO:0052547	regulation of peptidase activity	0.0162081	73
GO:0001525	angiogenesis	0.0165974	77
GO:0006734	NADH metabolic process	0.0167473	13
GO:0032615	interleukin-12 production	0.0168098	16
GO:0050679	positive regulation of epithelial cell proliferation	0.0168098	35
GO:0010595	positive regulation of endothelial cell migration	0.0173169	19
GO:1902166	negative regulation of intrinsic apoptotic signaling pathway in response to DNA damage by p53 class mediator	0.0173169	7
GO:0002696	positive regulation of leukocyte activation	0.0173169	59
GO:0032640	tumor necrosis factor production	0.017603	26
GO:0001649	osteoblast differentiation	0.0183838	43
GO:0030217	T cell differentiation	0.0183838	44
GO:0051384	response to glucocorticoid	0.0187755	32
GO:0002366	leukocyte activation involved in immune response	0.0198546	45
GO:0043552	positive regulation of phosphatidylinositol 3-kinase activity	0.0198546	11
GO:0042110	T cell activation	0.0198546	80
GO:0070489	T cell aggregation	0.0198546	80
GO:0006936	muscle contraction	0.0198546	62
GO:0048667	cell morphogenesis involved in neuron differentiation	0.0201195	89
GO:0022617	extracellular matrix disassembly	0.0201195	23
GO:0043410	positive regulation of MAPK cascade	0.0201195	85
GO:0050867	positive regulation of cell activation	0.0203604	60
GO:0071593	lymphocyte aggregation	0.0206299	80
GO:0018212	peptidyl-tyrosine modification	0.0207935	68
GO:0050718	positive regulation of interleukin-1 beta secretion	0.0210422	9
GO:0007249	I-kappaB kinase/NF-kappaB signaling	0.0213692	52
GO:2000107	negative regulation of leukocyte apoptotic process	0.0216886	14
GO:0030203	glycosaminoglycan metabolic process	0.0219819	36
GO:0007409	axonogenesis	0.0219819	75
GO:0032496	response to lipopolysaccharide	0.0222235	58
GO:0030278	regulation of ossification	0.0222688	38
GO:0050702	interleukin-1 beta secretion	0.0222759	12
GO:0002263	cell activation involved in immune response	0.0222759	45
GO:0043542	endothelial cell migration	0.0230607	34
GO:0030335	positive regulation of cell migration	0.0234752	72
GO:0050921	positive regulation of chemotaxis	0.0236992	28
GO:0006022	aminoglycan metabolic process	0.0239353	37
GO:0048732	gland development	0.0241108	75
GO:0000302	response to reactive oxygen species	0.0241108	43
GO:0006942	regulation of striated muscle contraction	0.0241108	21
GO:0000183	chromatin silencing at rDNA	0.0241108	13
GO:1900182	positive regulation of protein localization to nucleus	0.024177	29
GO:0031960	response to corticosteroid	0.024809	34
GO:0046683	response to organophosphorus	0.024809	30
GO:0032675	regulation of interleukin-6 production	0.024809	25
GO:0032680	regulation of tumor necrosis factor production	0.024809	25
GO:0032075	positive regulation of nuclease activity	0.024809	7
GO:0065004	protein-DNA complex assembly	0.0249839	46
GO:0042326	negative regulation of phosphorylation	0.0251229	76
GO:0018108	peptidyl-tyrosine phosphorylation	0.0251229	67
GO:0045638	negative regulation of myeloid cell differentiation	0.0251229	22
GO:0045785	positive regulation of cell adhesion	0.0251229	69
GO:0006735	NADH regeneration	0.0251229	10
GO:0061621	canonical glycolysis	0.0251229	10
GO:0061718	glucose catabolic process to pyruvate	0.0251229	10
GO:0032655	regulation of interleukin-12 production	0.0251229	15
GO:0043550	regulation of lipid kinase activity	0.0251229	15
GO:0098586	cellular response to virus	0.026138	12
GO:1902254	negative regulation of intrinsic apoptotic signaling pathway by p53 class mediator	0.026138	8
GO:0002577	regulation of antigen processing and presentation	0.026138	9
GO:0061082	myeloid leukocyte cytokine production	0.026138	9
GO:1902253	regulation of intrinsic apoptotic signaling pathway by p53 class mediator	0.026138	9
GO:1903510	mucopolysaccharide metabolic process	0.026138	27
GO:0042542	response to hydrogen peroxide	0.0273509	28
GO:0014074	response to purine-containing compound	0.0273909	32
GO:0001503	ossification	0.0274764	67
GO:0043551	regulation of phosphatidylinositol 3-kinase activity	0.0277603	13
GO:0043271	negative regulation of ion transport	0.0277603	26
GO:0071706	tumor necrosis factor superfamily cytokine production	0.0277603	26
GO:0010632	regulation of epithelial cell migration	0.0285068	36
GO:0006007	glucose catabolic process	0.0285436	11
GO:0060603	mammary gland duct morphogenesis	0.0285436	11
GO:1903115	regulation of actin filament-based movement	0.0285436	11
GO:0060443	mammary gland morphogenesis	0.0285436	14
GO:0048711	positive regulation of astrocyte differentiation	0.0287614	6
GO:0061081	positive regulation of myeloid leukocyte cytokine production involved in immune response	0.0287614	6
GO:0098911	regulation of ventricular cardiac muscle cell action potential	0.0287614	6
GO:0032722	positive regulation of chemokine production	0.0287614	15
GO:1903725	regulation of phospholipid metabolic process	0.0287614	16
GO:0010634	positive regulation of epithelial cell migration	0.028819	25
GO:0001933	negative regulation of protein phosphorylation	0.0290578	70
GO:0071241	cellular response to inorganic substance	0.0293102	33
GO:0014706	striated muscle tissue development	0.0296796	62
GO:2001234	negative regulation of apoptotic signaling pathway	0.0296796	42
GO:0042769	DNA damage response, detection of DNA damage	0.0307004	12
GO:0061615	glycolytic process through fructose-6-phosphate	0.0307004	10
GO:0061620	glycolytic process through glucose-6-phosphate	0.0307004	10
GO:0086004	regulation of cardiac muscle cell contraction	0.0307004	10
GO:0007411	axon guidance	0.0313922	44
GO:0097193	intrinsic apoptotic signaling pathway	0.0314914	53
GO:0060537	muscle tissue development	0.0315387	64
GO:0055117	regulation of cardiac muscle contraction	0.0316076	18
GO:1903555	regulation of tumor necrosis factor superfamily cytokine production	0.0316076	25
GO:0051170	nuclear import	0.0320328	55
GO:0052548	regulation of endopeptidase activity	0.0324796	67
GO:0002407	dendritic cell chemotaxis	0.0324796	9
GO:0043536	positive regulation of blood vessel endothelial cell migration	0.0324796	9
GO:0010758	regulation of macrophage chemotaxis	0.0324796	7
GO:0048569	post-embryonic animal organ development	0.0324796	7
GO:0051895	negative regulation of focal adhesion assembly	0.0324796	7
GO:0086011	membrane repolarization during action potential	0.0324796	7
GO:0010812	negative regulation of cell-substrate adhesion	0.0324796	15
GO:0050922	negative regulation of chemotaxis	0.0324796	15
GO:0097485	neuron projection guidance	0.0325422	44
GO:0006633	fatty acid biosynthetic process	0.0327957	31
GO:0009791	post-embryonic development	0.0330408	22
GO:0035994	response to muscle stretch	0.0331143	8
GO:0090218	positive regulation of lipid kinase activity	0.0334463	11
GO:0051054	positive regulation of DNA metabolic process	0.0368298	40
GO:2001242	regulation of intrinsic apoptotic signaling pathway	0.0368298	32
GO:0010769	regulation of cell morphogenesis involved in differentiation	0.0368325	50
GO:0046578	regulation of Ras protein signal transduction	0.0368325	39
GO:0002690	positive regulation of leukocyte chemotaxis	0.0370393	20
GO:2000106	regulation of leukocyte apoptotic process	0.0370393	20
GO:0006968	cellular defense response	0.0376757	16
GO:0051290	protein heterotetramerization	0.0376757	13
GO:0036336	dendritic cell migration	0.0377537	10
GO:0071248	cellular response to metal ion	0.0382881	29
GO:0071103	DNA conformation change	0.0392762	53
GO:0002685	regulation of leukocyte migration	0.0397392	32
GO:0006333	chromatin assembly or disassembly	0.0397392	38
GO:0032642	regulation of chemokine production	0.0407281	18
GO:0022618	ribonucleoprotein complex assembly	0.0421413	41
GO:0086013	membrane repolarization during cardiac muscle cell action potential	0.0426674	6
GO:0032635	interleukin-6 production	0.0426674	25
GO:0045862	positive regulation of proteolysis	0.0428117	64
GO:0006023	aminoglycan biosynthetic process	0.0437758	26
GO:0043280	positive regulation of cysteine-type endopeptidase activity involved in apoptotic process	0.0437758	26
GO:0010038	response to metal ion	0.0437758	56
GO:0035924	cellular response to vascular endothelial growth factor stimulus	0.0437758	12
GO:0098900	regulation of action potential	0.0437758	12
GO:0002444	myeloid leukocyte mediated immunity	0.0439098	19
GO:0007044	cell-substrate junction assembly	0.0442253	21
GO:0019320	hexose catabolic process	0.0442253	15
GO:0032692	negative regulation of interleukin-1 production	0.0442379	8
GO:0061298	retina vasculature development in camera-type eye	0.0451312	7
GO:1903392	negative regulation of adherens junction organization	0.0451312	7
GO:0002526	acute inflammatory response	0.0452402	29
GO:0045814	negative regulation of gene expression, epigenetic	0.0452402	29
GO:0051092	positive regulation of NF-kappaB transcription factor activity	0.0452402	29
GO:0050670	regulation of lymphocyte proliferation	0.0452791	38
GO:0002275	myeloid cell activation involved in immune response	0.0452791	18
GO:0006937	regulation of muscle contraction	0.0453359	31
GO:0006919	activation of cysteine-type endopeptidase activity involved in apoptotic process	0.0453359	20
GO:0030593	neutrophil chemotaxis	0.0453359	20
GO:0051897	positive regulation of protein kinase B signaling	0.0453359	20
GO:0006691	leukotriene metabolic process	0.0453359	10
GO:0014808	release of sequestered calcium ion into cytosol by sarcoplasmic reticulum	0.0453359	10
GO:0045730	respiratory burst	0.0453359	10
GO:0060441	epithelial tube branching involved in lung morphogenesis	0.0453359	10
GO:1903514	calcium ion transport from endoplasmic reticulum to cytosol	0.0453359	10
GO:0043299	leukocyte degranulation	0.0464421	17
GO:0032944	regulation of mononuclear cell proliferation	0.04803	38
GO:1990266	neutrophil migration	0.0480387	21
GO:1902229	regulation of intrinsic apoptotic signaling pathway in response to DNA damage	0.0490679	11
GO:0051251	positive regulation of lymphocyte activation	0.0490679	52
GO:0042107	cytokine metabolic process	0.049721	25
GO:0045667	regulation of osteoblast differentiation	0.049721	25
GO:0001706	endoderm formation	0.049721	15
MSigDB Negatively Enriched Pathways
NAME	GS<br> follow link to MSigDB	GS DETAILS	SIZE	ES	NES	NOM p-val	FDR q-val	FWER p-val	RANK AT MAX	LEADING EDGE
REACTOME_PEPTIDE_CHAIN_ELONGATION	REACTOME_PEPTIDE_CHAIN_ELONGATION	Details ...	85	-0.708825	-0.708825	0	0	0	4232	tags=89%, list=19%, signal=110%
KEGG_RIBOSOME	KEGG_RIBOSOME	Details ...	86	-0.69842	-0.69842	0	0	0	4232	tags=88%, list=19%, signal=108%
REACTOME_3_UTR_MEDIATED_TRANSLATIONAL_REGULATION	REACTOME_3_UTR_MEDIATED_TRANSLATIONAL_REGULATION	Details ...	105	-0.593585	-0.593585	0	0	0	5567	tags=84%, list=25%, signal=111%
REACTOME_SRP_DEPENDENT_COTRANSLATIONAL_PROTEIN_TARGETING_TO_MEMBRANE	REACTOME_SRP_DEPENDENT_COTRANSLATIONAL_PROTEIN_TARGETING_TO_MEMBRANE	Details ...	108	-0.589829	-0.589829	0	0	0	6171	tags=86%, list=27%, signal=118%
REACTOME_INFLUENZA_VIRAL_RNA_TRANSCRIPTION_AND_REPLICATION	REACTOME_INFLUENZA_VIRAL_RNA_TRANSCRIPTION_AND_REPLICATION	Details ...	101	-0.586942	-0.586942	0	0	0	4232	tags=77%, list=19%, signal=95%
REACTOME_NONSENSE_MEDIATED_DECAY_ENHANCED_BY_THE_EXON_JUNCTION_COMPLEX	REACTOME_NONSENSE_MEDIATED_DECAY_ENHANCED_BY_THE_EXON_JUNCTION_COMPLEX	Details ...	106	-0.563838	-0.563838	0	0	0	5419	tags=80%, list=24%, signal=105%
REACTOME_RNA_POL_I_PROMOTER_OPENING	REACTOME_RNA_POL_I_PROMOTER_OPENING	Details ...	54	-0.537891	-0.537891	0	0.00131143	0.007	4596	tags=74%, list=20%, signal=93%
REACTOME_FORMATION_OF_THE_TERNARY_COMPLEX_AND_SUBSEQUENTLY_THE_43S_COMPLEX	REACTOME_FORMATION_OF_THE_TERNARY_COMPLEX_AND_SUBSEQUENTLY_THE_43S_COMPLEX	Details ...	48	-0.529921	-0.529921	0	0.00162699	0.01	6387	tags=81%, list=28%, signal=113%
REACTOME_PACKAGING_OF_TELOMERE_ENDS	REACTOME_PACKAGING_OF_TELOMERE_ENDS	Details ...	45	-0.527484	-0.527484	0	0.00173318	0.012	6659	tags=82%, list=30%, signal=117%
REACTOME_DEPOSITION_OF_NEW_CENPA_CONTAINING_NUCLEOSOMES_AT_THE_CENTROMERE	REACTOME_DEPOSITION_OF_NEW_CENPA_CONTAINING_NUCLEOSOMES_AT_THE_CENTROMERE	Details ...	59	-0.516568	-0.516568	0	0.002598	0.02	8624	tags=90%, list=38%, signal=145%
REACTOME_ACTIVATION_OF_THE_MRNA_UPON_BINDING_OF_THE_CAP_BINDING_COMPLEX_AND_EIFS_AND_SUBSEQUENT_BINDING_TO_43S	REACTOME_ACTIVATION_OF_THE_MRNA_UPON_BINDING_OF_THE_CAP_BINDING_COMPLEX_AND_EIFS_AND_SUBSEQUENT_BINDING_TO_43S	Details ...	56	-0.503258	-0.503258	0	0.00366529	0.031	6387	tags=79%, list=28%, signal=109%
REACTOME_TRANSLATION	REACTOME_TRANSLATION	Details ...	145	-0.498815	-0.498815	0	0.00379883	0.035	6387	tags=78%, list=28%, signal=108%
BIOCARTA_EIF_PATHWAY	BIOCARTA_EIF_PATHWAY	Details ...	16	-0.48656	-0.48656	0.0019685	0.00519431	0.051	10159	tags=94%, list=45%, signal=171%
REACTOME_GLUCURONIDATION	REACTOME_GLUCURONIDATION	Details ...	16	-0.48292	-0.48292	0.00197628	0.00527643	0.056	1800	tags=56%, list=8%, signal=61%
REACTOME_G1_S_SPECIFIC_TRANSCRIPTION	REACTOME_G1_S_SPECIFIC_TRANSCRIPTION	Details ...	17	-0.462651	-0.462651	0.00203252	0.00861168	0.098	10780	tags=94%, list=48%, signal=180%
REACTOME_AMYLOIDS	REACTOME_AMYLOIDS	Details ...	70	-0.458085	-0.458085	0	0.00954214	0.112	6443	tags=74%, list=29%, signal=104%
KEGG_ASCORBATE_AND_ALDARATE_METABOLISM	KEGG_ASCORBATE_AND_ALDARATE_METABOLISM	Details ...	22	-0.456381	-0.456381	0	0.00928433	0.115	2016	tags=55%, list=9%, signal=60%
KEGG_MATURITY_ONSET_DIABETES_OF_THE_YOUNG	KEGG_MATURITY_ONSET_DIABETES_OF_THE_YOUNG	Details ...	16	-0.451213	-0.451213	0.00393701	0.00956403	0.124	3920	tags=63%, list=17%, signal=76%
REACTOME_INFLUENZA_LIFE_CYCLE	REACTOME_INFLUENZA_LIFE_CYCLE	Details ...	135	-0.443437	-0.443437	0	0.011527	0.15	5419	tags=68%, list=24%, signal=89%
REACTOME_CYCLIN_A_B1_ASSOCIATED_EVENTS_DURING_G2_M_TRANSITION	REACTOME_CYCLIN_A_B1_ASSOCIATED_EVENTS_DURING_G2_M_TRANSITION	Details ...	15	-0.434676	-0.434676	0.00625	0.0151652	0.203	6730	tags=73%, list=30%, signal=105%
REACTOME_INCRETIN_SYNTHESIS_SECRETION_AND_INACTIVATION	REACTOME_INCRETIN_SYNTHESIS_SECRETION_AND_INACTIVATION		16	-0.412109	-0.412109	0.0156556	0.0284183	0.369	9020	tags=81%, list=40%, signal=135%
REACTOME_MEIOTIC_RECOMBINATION	REACTOME_MEIOTIC_RECOMBINATION		76	-0.400901	-0.400901	0	0.0382974	0.487	7297	tags=72%, list=32%, signal=107%
REACTOME_SYNTHESIS_SECRETION_AND_INACTIVATION_OF_GLP1	REACTOME_SYNTHESIS_SECRETION_AND_INACTIVATION_OF_GLP1		15	-0.399582	-0.399582	0.0095057	0.0379169	0.499	9020	tags=80%, list=40%, signal=133%
REACTOME_REGULATION_OF_BETA_CELL_DEVELOPMENT	REACTOME_REGULATION_OF_BETA_CELL_DEVELOPMENT		20	-0.393321	-0.393321	0.0103093	0.0446714	0.567	4661	tags=60%, list=21%, signal=76%
KEGG_PROTEIN_EXPORT	KEGG_PROTEIN_EXPORT		23	-0.390096	-0.390096	0.00194553	0.0473902	0.603	11781	tags=91%, list=52%, signal=191%
BIOCARTA_NO2IL12_PATHWAY	BIOCARTA_NO2IL12_PATHWAY		16	-0.387618	-0.387618	0.00207039	0.0487517	0.624	1130	tags=44%, list=5%, signal=46%
BIOCARTA_PROTEASOME_PATHWAY	BIOCARTA_PROTEASOME_PATHWAY		28	-0.379139	-0.379139	0	0.0598746	0.715	10771	tags=86%, list=48%, signal=164%
BIOCARTA_CYTOKINE_PATHWAY	BIOCARTA_CYTOKINE_PATHWAY		15	-0.377727	-0.377727	0.0159681	0.0601796	0.726	8011	tags=73%, list=36%, signal=114%
REACTOME_RAS_ACTIVATION_UOPN_CA2_INFUX_THROUGH_NMDA_RECEPTOR	REACTOME_RAS_ACTIVATION_UOPN_CA2_INFUX_THROUGH_NMDA_RECEPTOR		16	-0.377048	-0.377048	0.0102669	0.0596204	0.735	6995	tags=69%, list=31%, signal=100%
BIOCARTA_IL17_PATHWAY	BIOCARTA_IL17_PATHWAY		15	-0.36905	-0.36905	0.0172745	0.0720233	0.818	5205	tags=60%, list=23%, signal=78%
REACTOME_APC_CDC20_MEDIATED_DEGRADATION_OF_NEK2A	REACTOME_APC_CDC20_MEDIATED_DEGRADATION_OF_NEK2A		21	-0.367618	-0.367618	0	0.0726693	0.833	14243	tags=100%, list=63%, signal=272%
REACTOME_APC_C_CDC20_MEDIATED_DEGRADATION_OF_CYCLIN_B	REACTOME_APC_C_CDC20_MEDIATED_DEGRADATION_OF_CYCLIN_B		19	-0.367586	-0.367586	0.0102881	0.0705198	0.833	14243	tags=100%, list=63%, signal=272%
REACTOME_INHIBITION_OF_THE_PROTEOLYTIC_ACTIVITY_OF_APC_C_REQUIRED_FOR_THE_ONSET_OF_ANAPHASE_BY_MITOTIC_SPINDLE_CHECKPOINT_COMPONENTS	REACTOME_INHIBITION_OF_THE_PROTEOLYTIC_ACTIVITY_OF_APC_C_REQUIRED_FOR_THE_ONSET_OF_ANAPHASE_BY_MITOTIC_SPINDLE_CHECKPOINT_COMPONENTS		18	-0.367569	-0.367569	0.00806452	0.0684226	0.833	14243	tags=100%, list=63%, signal=272%
REACTOME_PHOSPHORYLATION_OF_THE_APC_C	REACTOME_PHOSPHORYLATION_OF_THE_APC_C		17	-0.367553	-0.367553	0.010142	0.0664101	0.833	14243	tags=100%, list=63%, signal=272%
REACTOME_CONVERSION_FROM_APC_C_CDC20_TO_APC_C_CDH1_IN_LATE_ANAPHASE	REACTOME_CONVERSION_FROM_APC_C_CDC20_TO_APC_C_CDH1_IN_LATE_ANAPHASE		16	-0.367537	-0.367537	0.0182927	0.0645492	0.833	14243	tags=100%, list=63%, signal=272%
REACTOME_G0_AND_EARLY_G1	REACTOME_G0_AND_EARLY_G1		23	-0.364437	-0.364437	0.00423729	0.068816	0.855	9422	tags=78%, list=42%, signal=134%
REACTOME_DEADENYLATION_OF_MRNA	REACTOME_DEADENYLATION_OF_MRNA		19	-0.364115	-0.364115	0.00424628	0.0677922	0.859	10767	tags=84%, list=48%, signal=161%
REACTOME_MEIOTIC_SYNAPSIS	REACTOME_MEIOTIC_SYNAPSIS		67	-0.362001	-0.362001	0	0.0699131	0.877	6659	tags=66%, list=30%, signal=93%
REACTOME_SIGNALING_BY_BMP	REACTOME_SIGNALING_BY_BMP		20	-0.361672	-0.361672	0.0147368	0.0687464	0.878	11000	tags=85%, list=49%, signal=166%
REACTOME_RNA_POL_I_TRANSCRIPTION	REACTOME_RNA_POL_I_TRANSCRIPTION		79	-0.360234	-0.360234	0	0.0694947	0.884	6737	tags=66%, list=30%, signal=94%
PID_S1P_S1P1_PATHWAY	PID_S1P_S1P1_PATHWAY		21	-0.360071	-0.360071	0	0.068146	0.887	4766	tags=57%, list=21%, signal=72%
KEGG_PENTOSE_AND_GLUCURONATE_INTERCONVERSIONS	KEGG_PENTOSE_AND_GLUCURONATE_INTERCONVERSIONS		25	-0.360032	-0.360032	0.00199203	0.0666175	0.887	1810	tags=44%, list=8%, signal=48%
BIOCARTA_CK1_PATHWAY	BIOCARTA_CK1_PATHWAY		16	-0.359976	-0.359976	0.027027	0.0651273	0.888	7379	tags=69%, list=33%, signal=102%
BIOCARTA_NO1_PATHWAY	BIOCARTA_NO1_PATHWAY		29	-0.358472	-0.358472	0	0.0659703	0.894	7466	tags=69%, list=33%, signal=103%
REACTOME_PREFOLDIN_MEDIATED_TRANSFER_OF_SUBSTRATE_TO_CCT_TRIC	REACTOME_PREFOLDIN_MEDIATED_TRANSFER_OF_SUBSTRATE_TO_CCT_TRIC		27	-0.354076	-0.354076	0.0020202	0.0729007	0.917	11215	tags=85%, list=50%, signal=170%
REACTOME_DOWNREGULATION_OF_SMAD2_3_SMAD4_TRANSCRIPTIONAL_ACTIVITY	REACTOME_DOWNREGULATION_OF_SMAD2_3_SMAD4_TRANSCRIPTIONAL_ACTIVITY		19	-0.353488	-0.353488	0.0130597	0.0727757	0.921	11006	tags=84%, list=49%, signal=165%
REACTOME_TELOMERE_MAINTENANCE	REACTOME_TELOMERE_MAINTENANCE		72	-0.344988	-0.344988	0	0.0894175	0.958	6016	tags=61%, list=27%, signal=83%
REACTOME_FORMATION_OF_TUBULIN_FOLDING_INTERMEDIATES_BY_CCT_TRIC	REACTOME_FORMATION_OF_TUBULIN_FOLDING_INTERMEDIATES_BY_CCT_TRIC		21	-0.336484	-0.336484	0.0184426	0.110312	0.979	8512	tags=71%, list=38%, signal=115%
REACTOME_NETRIN1_SIGNALING	REACTOME_NETRIN1_SIGNALING		37	-0.33488	-0.33488	0	0.112159	0.985	7076	tags=65%, list=31%, signal=94%
REACTOME_ACTIVATION_OF_BH3_ONLY_PROTEINS	REACTOME_ACTIVATION_OF_BH3_ONLY_PROTEINS		16	-0.331692	-0.331692	0.0526316	0.119742	0.987	9422	tags=75%, list=42%, signal=129%
BIOCARTA_CELLCYCLE_PATHWAY	BIOCARTA_CELLCYCLE_PATHWAY		23	-0.330507	-0.330507	0.0100604	0.121261	0.989	7249	tags=65%, list=32%, signal=96%
BIOCARTA_INFLAM_PATHWAY	BIOCARTA_INFLAM_PATHWAY		25	-0.32969	-0.32969	0.0121212	0.121336	0.991	6994	tags=64%, list=31%, signal=93%
REACTOME_INTERACTION_BETWEEN_L1_AND_ANKYRINS	REACTOME_INTERACTION_BETWEEN_L1_AND_ANKYRINS		19	-0.329576	-0.329576	0.0198807	0.119385	0.991	3251	tags=47%, list=14%, signal=55%
REACTOME_REGULATION_OF_MITOTIC_CELL_CYCLE	REACTOME_REGULATION_OF_MITOTIC_CELL_CYCLE		77	-0.329059	-0.329059	0	0.118733	0.993	11036	tags=82%, list=49%, signal=160%
REACTOME_RNA_POL_III_TRANSCRIPTION_TERMINATION	REACTOME_RNA_POL_III_TRANSCRIPTION_TERMINATION		19	-0.328057	-0.328057	0.0222222	0.119507	0.994	15132	tags=100%, list=67%, signal=305%
REACTOME_RNA_POL_III_CHAIN_ELONGATION	REACTOME_RNA_POL_III_CHAIN_ELONGATION		17	-0.328028	-0.328028	0.0328542	0.11744	0.994	15132	tags=100%, list=67%, signal=305%
PID_AURORA_B_PATHWAY	PID_AURORA_B_PATHWAY		39	-0.327387	-0.327387	0.0020284	0.117305	0.994	12845	tags=90%, list=57%, signal=209%
REACTOME_MRNA_SPLICING_MINOR_PATHWAY	REACTOME_MRNA_SPLICING_MINOR_PATHWAY		42	-0.326231	-0.326231	0	0.118492	0.995	11965	tags=86%, list=53%, signal=183%
REACTOME_PD1_SIGNALING	REACTOME_PD1_SIGNALING		18	-0.324641	-0.324641	0.0313808	0.120923	0.996	13958	tags=94%, list=62%, signal=248%
PID_S1P_S1P3_PATHWAY	PID_S1P_S1P3_PATHWAY		29	-0.323188	-0.323188	0.00400802	0.123266	0.996	7483	tags=66%, list=33%, signal=98%
BIOCARTA_GATA3_PATHWAY	BIOCARTA_GATA3_PATHWAY		16	-0.323076	-0.323076	0.0570265	0.121605	0.996	8209	tags=69%, list=36%, signal=108%
KEGG_NITROGEN_METABOLISM	KEGG_NITROGEN_METABOLISM		23	-0.320296	-0.320296	0.019685	0.128153	0.998	3564	tags=48%, list=16%, signal=57%
REACTOME_CHOLESTEROL_BIOSYNTHESIS	REACTOME_CHOLESTEROL_BIOSYNTHESIS		22	-0.319245	-0.319245	0.00984252	0.130087	0.998	14308	tags=95%, list=64%, signal=262%
REACTOME_SCF_BETA_TRCP_MEDIATED_DEGRADATION_OF_EMI1	REACTOME_SCF_BETA_TRCP_MEDIATED_DEGRADATION_OF_EMI1		49	-0.318136	-0.318136	0	0.131246	0.998	10771	tags=80%, list=48%, signal=152%
REACTOME_PHOSPHORYLATION_OF_CD3_AND_TCR_ZETA_CHAINS	REACTOME_PHOSPHORYLATION_OF_CD3_AND_TCR_ZETA_CHAINS		16	-0.317663	-0.317663	0.0764331	0.130742	0.998	13958	tags=94%, list=62%, signal=247%
REACTOME_DARPP_32_EVENTS	REACTOME_DARPP_32_EVENTS		24	-0.314821	-0.314821	0.0136719	0.137774	0.999	9804	tags=75%, list=44%, signal=133%
PID_INTEGRIN_A4B1_PATHWAY	PID_INTEGRIN_A4B1_PATHWAY		32	-0.314193	-0.314193	0.00401606	0.138102	0.999	7007	tags=63%, list=31%, signal=91%
BIOCARTA_NKT_PATHWAY	BIOCARTA_NKT_PATHWAY		27	-0.312013	-0.312013	0	0.143884	0.999	1323	tags=37%, list=6%, signal=39%
PID_IL2_STAT5_PATHWAY	PID_IL2_STAT5_PATHWAY		29	-0.311742	-0.311742	0.00826446	0.142716	0.999	10845	tags=79%, list=48%, signal=153%
REACTOME_CTLA4_INHIBITORY_SIGNALING	REACTOME_CTLA4_INHIBITORY_SIGNALING		21	-0.311017	-0.311017	0.0181087	0.142907	0.999	14444	tags=95%, list=64%, signal=266%
REACTOME_DOUBLE_STRAND_BREAK_REPAIR	REACTOME_DOUBLE_STRAND_BREAK_REPAIR		22	-0.310834	-0.310834	0.0182927	0.141515	0.999	13474	tags=91%, list=60%, signal=226%
REACTOME_INHIBITION_OF_INSULIN_SECRETION_BY_ADRENALINE_NORADRENALINE	REACTOME_INHIBITION_OF_INSULIN_SECRETION_BY_ADRENALINE_NORADRENALINE		25	-0.310811	-0.310811	0.00582524	0.139655	0.999	13721	tags=92%, list=61%, signal=235%
REACTOME_APC_C_CDC20_MEDIATED_DEGRADATION_OF_MITOTIC_PROTEINS	REACTOME_APC_C_CDC20_MEDIATED_DEGRADATION_OF_MITOTIC_PROTEINS		65	-0.310649	-0.310649	0	0.138204	0.999	11036	tags=80%, list=49%, signal=156%
KEGG_SYSTEMIC_LUPUS_ERYTHEMATOSUS	KEGG_SYSTEMIC_LUPUS_ERYTHEMATOSUS		123	-0.310149	-0.310149	0	0.138365	1	6600	tags=60%, list=29%, signal=85%
KEGG_RNA_POLYMERASE	KEGG_RNA_POLYMERASE		29	-0.309201	-0.309201	0.0137255	0.139719	1	14783	tags=97%, list=66%, signal=281%
REACTOME_METABOLISM_OF_MRNA	REACTOME_METABOLISM_OF_MRNA		210	-0.308082	-0.308082	0	0.141704	1	8673	tags=69%, list=39%, signal=111%
KEGG_BIOSYNTHESIS_OF_UNSATURATED_FATTY_ACIDS	KEGG_BIOSYNTHESIS_OF_UNSATURATED_FATTY_ACIDS		22	-0.305639	-0.305639	0.0150659	0.148194	1	7452	tags=64%, list=33%, signal=95%
PID_SMAD2_3PATHWAY	PID_SMAD2_3PATHWAY		17	-0.305617	-0.305617	0.0593047	0.146379	1	14312	tags=94%, list=64%, signal=258%
REACTOME_CDK_MEDIATED_PHOSPHORYLATION_AND_REMOVAL_OF_CDC6	REACTOME_CDK_MEDIATED_PHOSPHORYLATION_AND_REMOVAL_OF_CDC6		46	-0.304756	-0.304756	0	0.147736	1	10771	tags=78%, list=48%, signal=150%
REACTOME_MEIOSIS	REACTOME_MEIOSIS		103	-0.303718	-0.303718	0	0.149563	1	6745	tags=60%, list=30%, signal=86%
REACTOME_HOMOLOGOUS_RECOMBINATION_REPAIR_OF_REPLICATION_INDEPENDENT_DOUBLE_STRAND_BREAKS	REACTOME_HOMOLOGOUS_RECOMBINATION_REPAIR_OF_REPLICATION_INDEPENDENT_DOUBLE_STRAND_BREAKS		16	-0.303711	-0.303711	0.0784708	0.14775	1	12865	tags=88%, list=57%, signal=204%
REACTOME_DESTABILIZATION_OF_MRNA_BY_AUF1_HNRNP_D0	REACTOME_DESTABILIZATION_OF_MRNA_BY_AUF1_HNRNP_D0		50	-0.302196	-0.302196	0	0.151275	1	10771	tags=78%, list=48%, signal=149%
BIOCARTA_MCM_PATHWAY	BIOCARTA_MCM_PATHWAY		18	-0.300965	-0.300965	0.0460251	0.154146	1	15741	tags=100%, list=70%, signal=332%
REACTOME_APC_C_CDH1_MEDIATED_DEGRADATION_OF_CDC20_AND_OTHER_APC_C_CDH1_TARGETED_PROTEINS_IN_LATE_MITOSIS_EARLY_G1	REACTOME_APC_C_CDH1_MEDIATED_DEGRADATION_OF_CDC20_AND_OTHER_APC_C_CDH1_TARGETED_PROTEINS_IN_LATE_MITOSIS_EARLY_G1		64	-0.300374	-0.300374	0	0.154502	1	14713	tags=95%, list=65%, signal=274%
REACTOME_FGFR_LIGAND_BINDING_AND_ACTIVATION	REACTOME_FGFR_LIGAND_BINDING_AND_ACTIVATION		18	-0.298942	-0.298942	0.0426357	0.157831	1	7033	tags=61%, list=31%, signal=89%
PID_MYC_ACTIV_PATHWAY	PID_MYC_ACTIV_PATHWAY		78	-0.297313	-0.297313	0	0.161696	1	10358	tags=76%, list=46%, signal=140%
PID_PLK1_PATHWAY	PID_PLK1_PATHWAY		46	-0.297204	-0.297204	0	0.160193	1	9962	tags=74%, list=44%, signal=132%
REACTOME_CYCLIN_E_ASSOCIATED_EVENTS_DURING_G1_S_TRANSITION_	REACTOME_CYCLIN_E_ASSOCIATED_EVENTS_DURING_G1_S_TRANSITION_		62	-0.296535	-0.296535	0	0.160846	1	10771	tags=77%, list=48%, signal=148%
REACTOME_SCFSKP2_MEDIATED_DEGRADATION_OF_P27_P21	REACTOME_SCFSKP2_MEDIATED_DEGRADATION_OF_P27_P21		53	-0.295806	-0.295806	0	0.16214	1	10771	tags=77%, list=48%, signal=148%
REACTOME_SIGNALING_BY_HIPPO	REACTOME_SIGNALING_BY_HIPPO		19	-0.294054	-0.294054	0.0669216	0.166985	1	11158	tags=79%, list=50%, signal=156%
REACTOME_AUTODEGRADATION_OF_CDH1_BY_CDH1_APC_C	REACTOME_AUTODEGRADATION_OF_CDH1_BY_CDH1_APC_C		56	-0.293554	-0.293554	0	0.167109	1	14713	tags=95%, list=65%, signal=273%
PID_FOXM1_PATHWAY	PID_FOXM1_PATHWAY		39	-0.293499	-0.293499	0.00816326	0.165405	1	11875	tags=82%, list=53%, signal=173%
PID_PDGFRA_PATHWAY	PID_PDGFRA_PATHWAY		21	-0.292804	-0.292804	0.0434783	0.166232	1	11638	tags=81%, list=52%, signal=167%
REACTOME_AMINO_ACID_SYNTHESIS_AND_INTERCONVERSION_TRANSAMINATION	REACTOME_AMINO_ACID_SYNTHESIS_AND_INTERCONVERSION_TRANSAMINATION		16	-0.291466	-0.291466	0.149701	0.169528	1	8920	tags=69%, list=40%, signal=114%
REACTOME_SMOOTH_MUSCLE_CONTRACTION	REACTOME_SMOOTH_MUSCLE_CONTRACTION		23	-0.290764	-0.290764	0.0334029	0.170554	1	7164	tags=61%, list=32%, signal=89%
REACTOME_MRNA_SPLICING	REACTOME_MRNA_SPLICING		106	-0.290602	-0.290602	0	0.169453	1	11965	tags=82%, list=53%, signal=174%
BIOCARTA_ARF_PATHWAY	BIOCARTA_ARF_PATHWAY		17	-0.290448	-0.290448	0.0841487	0.168358	1	10681	tags=76%, list=47%, signal=145%
REACTOME_RNA_POL_III_TRANSCRIPTION_INITIATION_FROM_TYPE_3_PROMOTER	REACTOME_RNA_POL_III_TRANSCRIPTION_INITIATION_FROM_TYPE_3_PROMOTER		26	-0.289653	-0.289653	0.0295858	0.169786	1	15132	tags=96%, list=67%, signal=293%
KEGG_PROTEASOME	KEGG_PROTEASOME		43	-0.28952	-0.28952	0.00404858	0.168572	1	10771	tags=77%, list=48%, signal=147%
PID_INTEGRIN5_PATHWAY	PID_INTEGRIN5_PATHWAY		17	-0.28777	-0.28777	0.0952381	0.173562	1	5445	tags=53%, list=24%, signal=70%
REACTOME_PROCESSING_OF_CAPPED_INTRONLESS_PRE_MRNA	REACTOME_PROCESSING_OF_CAPPED_INTRONLESS_PRE_MRNA		23	-0.28775	-0.28775	0.0410156	0.171933	1	15061	tags=96%, list=67%, signal=289%
REACTOME_SYNTHESIS_AND_INTERCONVERSION_OF_NUCLEOTIDE_DI_AND_TRIPHOSPHATES	REACTOME_SYNTHESIS_AND_INTERCONVERSION_OF_NUCLEOTIDE_DI_AND_TRIPHOSPHATES		19	-0.287609	-0.287609	0.0598456	0.170616	1	14857	tags=95%, list=66%, signal=278%
REACTOME_G1_S_TRANSITION	REACTOME_G1_S_TRANSITION		106	-0.286626	-0.286626	0	0.172593	1	10780	tags=76%, list=48%, signal=146%
PID_NFAT_TFPATHWAY	PID_NFAT_TFPATHWAY		44	-0.286562	-0.286562	0	0.171144	1	9422	tags=70%, list=42%, signal=121%
REACTOME_PROSTACYCLIN_SIGNALLING_THROUGH_PROSTACYCLIN_RECEPTOR	REACTOME_PROSTACYCLIN_SIGNALLING_THROUGH_PROSTACYCLIN_RECEPTOR		19	-0.285444	-0.285444	0.0677618	0.173844	1	13721	tags=89%, list=61%, signal=229%
REACTOME_CLEAVAGE_OF_GROWING_TRANSCRIPT_IN_THE_TERMINATION_REGION_	REACTOME_CLEAVAGE_OF_GROWING_TRANSCRIPT_IN_THE_TERMINATION_REGION_		42	-0.284687	-0.284687	0.0039604	0.175158	1	15578	tags=98%, list=69%, signal=316%
REACTOME_RNA_POL_III_TRANSCRIPTION_INITIATION_FROM_TYPE_2_PROMOTER	REACTOME_RNA_POL_III_TRANSCRIPTION_INITIATION_FROM_TYPE_2_PROMOTER		23	-0.284593	-0.284593	0.0243902	0.173923	1	15132	tags=96%, list=67%, signal=292%
REACTOME_MITOTIC_PROMETAPHASE	REACTOME_MITOTIC_PROMETAPHASE		85	-0.283464	-0.283464	0	0.177133	1	11387	tags=79%, list=51%, signal=159%
REACTOME_NEGATIVE_REGULATION_OF_FGFR_SIGNALING	REACTOME_NEGATIVE_REGULATION_OF_FGFR_SIGNALING		32	-0.281742	-0.281742	0.0157171	0.182815	1	7033	tags=59%, list=31%, signal=86%
BIOCARTA_ACTINY_PATHWAY	BIOCARTA_ACTINY_PATHWAY		19	-0.279394	-0.279394	0.074	0.190907	1	10303	tags=74%, list=46%, signal=136%
REACTOME_E2F_MEDIATED_REGULATION_OF_DNA_REPLICATION	REACTOME_E2F_MEDIATED_REGULATION_OF_DNA_REPLICATION		33	-0.27911	-0.27911	0.0114723	0.190501	1	10780	tags=76%, list=48%, signal=145%
REACTOME_CHROMOSOME_MAINTENANCE	REACTOME_CHROMOSOME_MAINTENANCE		114	-0.279052	-0.279052	0	0.189008	1	11127	tags=77%, list=49%, signal=152%
REACTOME_REGULATION_OF_ORNITHINE_DECARBOXYLASE_ODC	REACTOME_REGULATION_OF_ORNITHINE_DECARBOXYLASE_ODC		48	-0.278758	-0.278758	0.00192678	0.188699	1	14842	tags=94%, list=66%, signal=275%
REACTOME_DEGRADATION_OF_THE_EXTRACELLULAR_MATRIX	REACTOME_DEGRADATION_OF_THE_EXTRACELLULAR_MATRIX		26	-0.27809	-0.27809	0.0316832	0.190039	1	2406	tags=38%, list=11%, signal=43%
REACTOME_MRNA_3_END_PROCESSING	REACTOME_MRNA_3_END_PROCESSING		33	-0.27807	-0.27807	0.00392157	0.188522	1	15578	tags=97%, list=69%, signal=314%
REACTOME_VIF_MEDIATED_DEGRADATION_OF_APOBEC3G	REACTOME_VIF_MEDIATED_DEGRADATION_OF_APOBEC3G		49	-0.27723	-0.27723	0	0.190639	1	10771	tags=76%, list=48%, signal=144%
KEGG_RETINOL_METABOLISM	KEGG_RETINOL_METABOLISM		52	-0.277127	-0.277127	0	0.189395	1	2002	tags=37%, list=9%, signal=40%
REACTOME_G_PROTEIN_ACTIVATION	REACTOME_G_PROTEIN_ACTIVATION		26	-0.2754	-0.2754	0.0355731	0.195605	1	13721	tags=88%, list=61%, signal=226%
REACTOME_P53_INDEPENDENT_G1_S_DNA_DAMAGE_CHECKPOINT	REACTOME_P53_INDEPENDENT_G1_S_DNA_DAMAGE_CHECKPOINT		48	-0.272105	-0.272105	0	0.208904	1	10771	tags=75%, list=48%, signal=144%
REACTOME_SHC_MEDIATED_CASCADE	REACTOME_SHC_MEDIATED_CASCADE		24	-0.271214	-0.271214	0.0456349	0.211127	1	7033	tags=58%, list=31%, signal=85%
PID_CD40_PATHWAY	PID_CD40_PATHWAY		31	-0.270679	-0.270679	0.00860215	0.212181	1	11343	tags=77%, list=50%, signal=156%
REACTOME_METABOLISM_OF_RNA	REACTOME_METABOLISM_OF_RNA		255	-0.270269	-0.270269	0	0.212412	1	11464	tags=78%, list=51%, signal=156%
REACTOME_ER_PHAGOSOME_PATHWAY	REACTOME_ER_PHAGOSOME_PATHWAY		58	-0.269956	-0.269956	0.00203666	0.212148	1	11016	tags=76%, list=49%, signal=148%
SA_G1_AND_S_PHASES	SA_G1_AND_S_PHASES		15	-0.268143	-0.268143	0.235178	0.218979	1	10476	tags=73%, list=47%, signal=137%
KEGG_STEROID_HORMONE_BIOSYNTHESIS	KEGG_STEROID_HORMONE_BIOSYNTHESIS		50	-0.268107	-0.268107	0	0.217454	1	2533	tags=38%, list=11%, signal=43%
PID_ALK1_PATHWAY	PID_ALK1_PATHWAY		25	-0.267682	-0.267682	0.0412574	0.217728	1	12890	tags=84%, list=57%, signal=196%
REACTOME_RNA_POL_III_TRANSCRIPTION	REACTOME_RNA_POL_III_TRANSCRIPTION		33	-0.267566	-0.267566	0.0163934	0.21673	1	15132	tags=94%, list=67%, signal=286%
REACTOME_SIGNALING_BY_FGFR1_FUSION_MUTANTS	REACTOME_SIGNALING_BY_FGFR1_FUSION_MUTANTS		18	-0.266973	-0.266973	0.136273	0.218058	1	15255	tags=94%, list=68%, signal=293%
KEGG_DRUG_METABOLISM_CYTOCHROME_P450	KEGG_DRUG_METABOLISM_CYTOCHROME_P450		60	-0.26684	-0.26684	0	0.216941	1	2264	tags=37%, list=10%, signal=41%
REACTOME_DOWNREGULATION_OF_TGF_BETA_RECEPTOR_SIGNALING	REACTOME_DOWNREGULATION_OF_TGF_BETA_RECEPTOR_SIGNALING		21	-0.266307	-0.266307	0.0830116	0.217776	1	11162	tags=76%, list=50%, signal=151%
BIOCARTA_DC_PATHWAY	BIOCARTA_DC_PATHWAY		19	-0.265856	-0.265856	0.10099	0.218287	1	1130	tags=32%, list=5%, signal=33%
REACTOME_REGULATORY_RNA_PATHWAYS	REACTOME_REGULATORY_RNA_PATHWAYS		25	-0.265745	-0.265745	0.0380228	0.21715	1	16535	tags=100%, list=73%, signal=376%
REACTOME_MICRORNA_MIRNA_BIOGENESIS	REACTOME_MICRORNA_MIRNA_BIOGENESIS		22	-0.265709	-0.265709	0.0821355	0.215742	1	16535	tags=100%, list=73%, signal=376%
REACTOME_TGF_BETA_RECEPTOR_SIGNALING_ACTIVATES_SMADS	REACTOME_TGF_BETA_RECEPTOR_SIGNALING_ACTIVATES_SMADS		24	-0.265605	-0.265605	0.040568	0.214664	1	15600	tags=96%, list=69%, signal=312%
PID_TCR_CALCIUM_PATHWAY	PID_TCR_CALCIUM_PATHWAY		27	-0.265294	-0.265294	0.0357143	0.21446	1	8209	tags=63%, list=36%, signal=99%
REACTOME_ABORTIVE_ELONGATION_OF_HIV1_TRANSCRIPT_IN_THE_ABSENCE_OF_TAT	REACTOME_ABORTIVE_ELONGATION_OF_HIV1_TRANSCRIPT_IN_THE_ABSENCE_OF_TAT		23	-0.265292	-0.265292	0.0492505	0.212893	1	15566	tags=96%, list=69%, signal=310%
REACTOME_PROCESSING_OF_CAPPED_INTRON_CONTAINING_PRE_MRNA	REACTOME_PROCESSING_OF_CAPPED_INTRON_CONTAINING_PRE_MRNA		135	-0.264709	-0.264709	0	0.213634	1	13086	tags=84%, list=58%, signal=201%
REACTOME_CDT1_ASSOCIATION_WITH_THE_CDC6_ORC_ORIGIN_COMPLEX	REACTOME_CDT1_ASSOCIATION_WITH_THE_CDC6_ORC_ORIGIN_COMPLEX		54	-0.262896	-0.262896	0	0.220562	1	10771	tags=74%, list=48%, signal=142%
REACTOME_MITOTIC_M_M_G1_PHASES	REACTOME_MITOTIC_M_M_G1_PHASES		167	-0.261633	-0.261633	0	0.225024	1	11408	tags=77%, list=51%, signal=154%
REACTOME_MITOTIC_G1_G1_S_PHASES	REACTOME_MITOTIC_G1_G1_S_PHASES		130	-0.261094	-0.261094	0	0.226067	1	10780	tags=74%, list=48%, signal=141%
REACTOME_ORC1_REMOVAL_FROM_CHROMATIN	REACTOME_ORC1_REMOVAL_FROM_CHROMATIN		65	-0.260739	-0.260739	0	0.226389	1	10771	tags=74%, list=48%, signal=141%
REACTOME_FATTY_ACYL_COA_BIOSYNTHESIS	REACTOME_FATTY_ACYL_COA_BIOSYNTHESIS		18	-0.259059	-0.259059	0.134021	0.233426	1	7930	tags=61%, list=35%, signal=94%
NABA_PROTEOGLYCANS	NABA_PROTEOGLYCANS		33	-0.258882	-0.258882	0.0176471	0.232586	1	6460	tags=55%, list=29%, signal=76%
KEGG_RIBOFLAVIN_METABOLISM	KEGG_RIBOFLAVIN_METABOLISM		15	-0.258344	-0.258344	0.22	0.233692	1	4694	tags=47%, list=21%, signal=59%
REACTOME_CYTOSOLIC_TRNA_AMINOACYLATION	REACTOME_CYTOSOLIC_TRNA_AMINOACYLATION		24	-0.255565	-0.255565	0.0616302	0.246417	1	13950	tags=88%, list=62%, signal=230%
PID_DELTA_NP63_PATHWAY	PID_DELTA_NP63_PATHWAY		47	-0.254935	-0.254935	0.00198807	0.248109	1	14868	tags=91%, list=66%, signal=269%
REACTOME_CITRIC_ACID_CYCLE_TCA_CYCLE	REACTOME_CITRIC_ACID_CYCLE_TCA_CYCLE		19	-0.254394	-0.254394	0.136842	0.249294	1	15604	tags=95%, list=69%, signal=309%
REACTOME_REGULATION_OF_APOPTOSIS	REACTOME_REGULATION_OF_APOPTOSIS		56	-0.2543	-0.2543	0.00204499	0.248108	1	10771	tags=73%, list=48%, signal=140%
BIOCARTA_RARRXR_PATHWAY	BIOCARTA_RARRXR_PATHWAY		15	-0.253419	-0.253419	0.261297	0.251152	1	15309	tags=93%, list=68%, signal=292%
REACTOME_M_G1_TRANSITION	REACTOME_M_G1_TRANSITION		78	-0.25277	-0.25277	0	0.253475	1	10780	tags=73%, list=48%, signal=140%
REACTOME_SIGNALING_BY_WNT	REACTOME_SIGNALING_BY_WNT		63	-0.25239	-0.25239	0	0.253541	1	10771	tags=73%, list=48%, signal=140%
REACTOME_ASSEMBLY_OF_THE_PRE_REPLICATIVE_COMPLEX	REACTOME_ASSEMBLY_OF_THE_PRE_REPLICATIVE_COMPLEX		63	-0.25239	-0.25239	0	0.251873	1	10771	tags=73%, list=48%, signal=140%
REACTOME_MITOCHONDRIAL_PROTEIN_IMPORT	REACTOME_MITOCHONDRIAL_PROTEIN_IMPORT		50	-0.252251	-0.252251	0.00429185	0.250969	1	10092	tags=70%, list=45%, signal=127%
KEGG_STEROID_BIOSYNTHESIS	KEGG_STEROID_BIOSYNTHESIS		17	-0.250562	-0.250562	0.156504	0.258692	1	8930	tags=65%, list=40%, signal=107%
REACTOME_TRANSCRIPTIONAL_ACTIVITY_OF_SMAD2_SMAD3_SMAD4_HETEROTRIMER	REACTOME_TRANSCRIPTIONAL_ACTIVITY_OF_SMAD2_SMAD3_SMAD4_HETEROTRIMER		36	-0.250111	-0.250111	0.0143443	0.259584	1	11262	tags=75%, list=50%, signal=150%
REACTOME_A_TETRASACCHARIDE_LINKER_SEQUENCE_IS_REQUIRED_FOR_GAG_SYNTHESIS	REACTOME_A_TETRASACCHARIDE_LINKER_SEQUENCE_IS_REQUIRED_FOR_GAG_SYNTHESIS		24	-0.2493	-0.2493	0.0916844	0.262635	1	5650	tags=50%, list=25%, signal=67%
REACTOME_S_PHASE	REACTOME_S_PHASE		106	-0.248711	-0.248711	0	0.26417	1	10780	tags=73%, list=48%, signal=139%
REACTOME_RESPIRATORY_ELECTRON_TRANSPORT	REACTOME_RESPIRATORY_ELECTRON_TRANSPORT		65	-0.24793	-0.24793	0	0.266925	1	15214	tags=92%, list=68%, signal=284%
REACTOME_ADP_SIGNALLING_THROUGH_P2RY12	REACTOME_ADP_SIGNALLING_THROUGH_P2RY12		21	-0.24784	-0.24784	0.128257	0.265787	1	13721	tags=86%, list=61%, signal=219%
PID_REG_GR_PATHWAY	PID_REG_GR_PATHWAY		76	-0.24714	-0.24714	0	0.267781	1	11931	tags=78%, list=53%, signal=165%
BIOCARTA_CTLA4_PATHWAY	BIOCARTA_CTLA4_PATHWAY		19	-0.245822	-0.245822	0.17	0.273994	1	7504	tags=58%, list=33%, signal=87%
REACTOME_CROSS_PRESENTATION_OF_SOLUBLE_EXOGENOUS_ANTIGENS_ENDOSOMES	REACTOME_CROSS_PRESENTATION_OF_SOLUBLE_EXOGENOUS_ANTIGENS_ENDOSOMES		47	-0.245442	-0.245442	0.00784314	0.274575	1	10771	tags=72%, list=48%, signal=138%
REACTOME_AUTODEGRADATION_OF_THE_E3_UBIQUITIN_LIGASE_COP1	REACTOME_AUTODEGRADATION_OF_THE_E3_UBIQUITIN_LIGASE_COP1		47	-0.245442	-0.245442	0.00598802	0.272891	1	10771	tags=72%, list=48%, signal=138%
KEGG_PROXIMAL_TUBULE_BICARBONATE_RECLAMATION	KEGG_PROXIMAL_TUBULE_BICARBONATE_RECLAMATION		23	-0.245432	-0.245432	0.108268	0.271267	1	9162	tags=65%, list=41%, signal=110%
KEGG_CELL_CYCLE	KEGG_CELL_CYCLE		124	-0.245015	-0.245015	0	0.272038	1	14484	tags=89%, list=64%, signal=247%
REACTOME_ANTIGEN_PRESENTATION_FOLDING_ASSEMBLY_AND_PEPTIDE_LOADING_OF_CLASS_I_MHC	REACTOME_ANTIGEN_PRESENTATION_FOLDING_ASSEMBLY_AND_PEPTIDE_LOADING_OF_CLASS_I_MHC		20	-0.244869	-0.244869	0.134921	0.271234	1	9125	tags=65%, list=41%, signal=109%
PID_INTEGRIN3_PATHWAY	PID_INTEGRIN3_PATHWAY		41	-0.244615	-0.244615	0.00618557	0.270942	1	3838	tags=41%, list=17%, signal=50%
PID_ATR_PATHWAY	PID_ATR_PATHWAY		39	-0.244339	-0.244339	0.0105708	0.270932	1	10671	tags=72%, list=47%, signal=136%
REACTOME_RESPIRATORY_ELECTRON_TRANSPORT_ATP_SYNTHESIS_BY_CHEMIOSMOTIC_COUPLING_AND_HEAT_PRODUCTION_BY_UNCOUPLING_PROTEINS_	REACTOME_RESPIRATORY_ELECTRON_TRANSPORT_ATP_SYNTHESIS_BY_CHEMIOSMOTIC_COUPLING_AND_HEAT_PRODUCTION_BY_UNCOUPLING_PROTEINS_		81	-0.243936	-0.243936	0.0020202	0.271763	1	12037	tags=78%, list=53%, signal=167%
SIG_REGULATION_OF_THE_ACTIN_CYTOSKELETON_BY_RHO_GTPASES	SIG_REGULATION_OF_THE_ACTIN_CYTOSKELETON_BY_RHO_GTPASES		34	-0.243902	-0.243902	0.030426	0.27037	1	10408	tags=71%, list=46%, signal=131%
REACTOME_REGULATION_OF_KIT_SIGNALING	REACTOME_REGULATION_OF_KIT_SIGNALING		16	-0.243826	-0.243826	0.236328	0.269242	1	14212	tags=88%, list=63%, signal=237%
REACTOME_ACTIVATION_OF_NF_KAPPAB_IN_B_CELLS	REACTOME_ACTIVATION_OF_NF_KAPPAB_IN_B_CELLS		62	-0.243559	-0.243559	0.00213675	0.269326	1	10871	tags=73%, list=48%, signal=140%
REACTOME_METABOLISM_OF_PROTEINS	REACTOME_METABOLISM_OF_PROTEINS		420	-0.243166	-0.243166	0	0.270171	1	10386	tags=70%, list=46%, signal=128%
REACTOME_KERATAN_SULFATE_BIOSYNTHESIS	REACTOME_KERATAN_SULFATE_BIOSYNTHESIS		26	-0.242994	-0.242994	0.0802469	0.269526	1	6658	tags=54%, list=30%, signal=76%
KEGG_GLYCOSAMINOGLYCAN_BIOSYNTHESIS_KERATAN_SULFATE	KEGG_GLYCOSAMINOGLYCAN_BIOSYNTHESIS_KERATAN_SULFATE		15	-0.241744	-0.241744	0.318359	0.275089	1	6568	tags=53%, list=29%, signal=75%
REACTOME_DNA_REPLICATION	REACTOME_DNA_REPLICATION		187	-0.241047	-0.241047	0	0.277588	1	11472	tags=75%, list=51%, signal=151%
REACTOME_POST_CHAPERONIN_TUBULIN_FOLDING_PATHWAY	REACTOME_POST_CHAPERONIN_TUBULIN_FOLDING_PATHWAY		18	-0.240163	-0.240163	0.22179	0.281288	1	13357	tags=83%, list=59%, signal=205%
REACTOME_LYSOSOME_VESICLE_BIOGENESIS	REACTOME_LYSOSOME_VESICLE_BIOGENESIS		23	-0.240095	-0.240095	0.118343	0.280038	1	9282	tags=65%, list=41%, signal=111%
REACTOME_SIGNALING_BY_NODAL	REACTOME_SIGNALING_BY_NODAL		16	-0.240039	-0.240039	0.258064	0.278848	1	15704	tags=94%, list=70%, signal=310%
REACTOME_RNA_POL_I_RNA_POL_III_AND_MITOCHONDRIAL_TRANSCRIPTION	REACTOME_RNA_POL_I_RNA_POL_III_AND_MITOCHONDRIAL_TRANSCRIPTION		112	-0.239687	-0.239687	0	0.279496	1	15132	tags=91%, list=67%, signal=276%
KEGG_METABOLISM_OF_XENOBIOTICS_BY_CYTOCHROME_P450	KEGG_METABOLISM_OF_XENOBIOTICS_BY_CYTOCHROME_P450		59	-0.239072	-0.239072	0	0.281433	1	2264	tags=34%, list=10%, signal=38%
REACTOME_P53_DEPENDENT_G1_DNA_DAMAGE_RESPONSE	REACTOME_P53_DEPENDENT_G1_DNA_DAMAGE_RESPONSE		53	-0.239069	-0.239069	0.00401606	0.279894	1	10771	tags=72%, list=48%, signal=137%
REACTOME_G1_PHASE	REACTOME_G1_PHASE		35	-0.238971	-0.238971	0.0284553	0.278838	1	9422	tags=66%, list=42%, signal=113%
BIOCARTA_VIP_PATHWAY	BIOCARTA_VIP_PATHWAY		26	-0.238741	-0.238741	0.0603622	0.278776	1	11948	tags=77%, list=53%, signal=164%
REACTOME_ACTIVATION_OF_THE_PRE_REPLICATIVE_COMPLEX	REACTOME_ACTIVATION_OF_THE_PRE_REPLICATIVE_COMPLEX		30	-0.238036	-0.238036	0.0638298	0.281115	1	14158	tags=87%, list=63%, signal=233%
REACTOME_SIGNALING_BY_ROBO_RECEPTOR	REACTOME_SIGNALING_BY_ROBO_RECEPTOR		29	-0.238009	-0.238009	0.078125	0.279826	1	10174	tags=69%, list=45%, signal=126%
KEGG_ALANINE_ASPARTATE_AND_GLUTAMATE_METABOLISM	KEGG_ALANINE_ASPARTATE_AND_GLUTAMATE_METABOLISM		30	-0.237408	-0.237408	0.043299	0.281544	1	8920	tags=63%, list=40%, signal=105%
BIOCARTA_IL7_PATHWAY	BIOCARTA_IL7_PATHWAY		17	-0.237363	-0.237363	0.204453	0.280288	1	11875	tags=76%, list=53%, signal=162%
BIOCARTA_G1_PATHWAY	BIOCARTA_G1_PATHWAY		28	-0.236504	-0.236504	0.0570825	0.283849	1	10762	tags=71%, list=48%, signal=137%
KEGG_DRUG_METABOLISM_OTHER_ENZYMES	KEGG_DRUG_METABOLISM_OTHER_ENZYMES		46	-0.235137	-0.235137	0.0106838	0.291101	1	2059	tags=33%, list=9%, signal=36%
PID_PRL_SIGNALING_EVENTS_PATHWAY	PID_PRL_SIGNALING_EVENTS_PATHWAY		23	-0.234449	-0.234449	0.151951	0.293702	1	6473	tags=52%, list=29%, signal=73%
REACTOME_NEP_NS2_INTERACTS_WITH_THE_CELLULAR_EXPORT_MACHINERY	REACTOME_NEP_NS2_INTERACTS_WITH_THE_CELLULAR_EXPORT_MACHINERY		27	-0.233772	-0.233772	0.0934394	0.296372	1	13086	tags=81%, list=58%, signal=194%
REACTOME_TRANSPORT_OF_VITAMINS_NUCLEOSIDES_AND_RELATED_MOLECULES	REACTOME_TRANSPORT_OF_VITAMINS_NUCLEOSIDES_AND_RELATED_MOLECULES		28	-0.232253	-0.232253	0.0838446	0.30415	1	7642	tags=57%, list=34%, signal=86%
REACTOME_CELL_CYCLE_CHECKPOINTS	REACTOME_CELL_CYCLE_CHECKPOINTS		111	-0.231615	-0.231615	0	0.306363	1	11036	tags=72%, list=49%, signal=141%
REACTOME_INTERACTIONS_OF_VPR_WITH_HOST_CELLULAR_PROTEINS	REACTOME_INTERACTIONS_OF_VPR_WITH_HOST_CELLULAR_PROTEINS		32	-0.231506	-0.231506	0.0630081	0.305271	1	13086	tags=81%, list=58%, signal=194%
KEGG_OXIDATIVE_PHOSPHORYLATION	KEGG_OXIDATIVE_PHOSPHORYLATION		112	-0.230536	-0.230536	0	0.310008	1	14935	tags=89%, list=66%, signal=264%
PID_BARD1_PATHWAY	PID_BARD1_PATHWAY		29	-0.230277	-0.230277	0.0689655	0.310052	1	11124	tags=72%, list=49%, signal=143%
REACTOME_PERK_REGULATED_GENE_EXPRESSION	REACTOME_PERK_REGULATED_GENE_EXPRESSION		26	-0.22962	-0.22962	0.128514	0.312436	1	15616	tags=92%, list=69%, signal=301%
KEGG_PORPHYRIN_AND_CHLOROPHYLL_METABOLISM	KEGG_PORPHYRIN_AND_CHLOROPHYLL_METABOLISM		37	-0.229273	-0.229273	0.0221328	0.313022	1	2149	tags=32%, list=10%, signal=36%
PID_UPA_UPAR_PATHWAY	PID_UPA_UPAR_PATHWAY		40	-0.228495	-0.228495	0.0258964	0.316565	1	4996	tags=45%, list=22%, signal=58%
REACTOME_TRANSCRIPTION	REACTOME_TRANSCRIPTION		197	-0.228255	-0.228255	0	0.31626	1	15132	tags=90%, list=67%, signal=272%
REACTOME_TRANSPORT_OF_MATURE_TRANSCRIPT_TO_CYTOPLASM	REACTOME_TRANSPORT_OF_MATURE_TRANSCRIPT_TO_CYTOPLASM		52	-0.226893	-0.226893	0.00598802	0.32381	1	13086	tags=81%, list=58%, signal=192%
REACTOME_SYNTHESIS_OF_DNA	REACTOME_SYNTHESIS_OF_DNA		90	-0.226718	-0.226718	0	0.323351	1	14426	tags=87%, list=64%, signal=240%
PID_AVB3_OPN_PATHWAY	PID_AVB3_OPN_PATHWAY		31	-0.226583	-0.226583	0.078125	0.322747	1	10882	tags=71%, list=48%, signal=137%
NABA_BASEMENT_MEMBRANES	NABA_BASEMENT_MEMBRANES		40	-0.226573	-0.226573	0.0215264	0.321216	1	3351	tags=38%, list=15%, signal=44%
REACTOME_ELONGATION_ARREST_AND_RECOVERY	REACTOME_ELONGATION_ARREST_AND_RECOVERY		31	-0.226391	-0.226391	0.0697674	0.32082	1	15969	tags=94%, list=71%, signal=322%
KEGG_ASTHMA	KEGG_ASTHMA		28	-0.226297	-0.226297	0.0828283	0.320004	1	6972	tags=54%, list=31%, signal=78%
REACTOME_DEADENYLATION_DEPENDENT_MRNA_DECAY	REACTOME_DEADENYLATION_DEPENDENT_MRNA_DECAY		44	-0.224725	-0.224725	0.024	0.328445	1	13369	tags=82%, list=59%, signal=201%
KEGG_GLYCOSPHINGOLIPID_BIOSYNTHESIS_LACTO_AND_NEOLACTO_SERIES	KEGG_GLYCOSPHINGOLIPID_BIOSYNTHESIS_LACTO_AND_NEOLACTO_SERIES		25	-0.224501	-0.224501	0.148225	0.328197	1	6658	tags=52%, list=30%, signal=74%
REACTOME_MRNA_PROCESSING	REACTOME_MRNA_PROCESSING		154	-0.224206	-0.224206	0	0.328625	1	13113	tags=81%, list=58%, signal=192%
BIOCARTA_UCALPAIN_PATHWAY	BIOCARTA_UCALPAIN_PATHWAY		18	-0.223334	-0.223334	0.266417	0.333137	1	7483	tags=56%, list=33%, signal=83%
REACTOME_DNA_STRAND_ELONGATION	REACTOME_DNA_STRAND_ELONGATION		30	-0.222973	-0.222973	0.0865979	0.333922	1	12996	tags=80%, list=58%, signal=189%
BIOCARTA_NOS1_PATHWAY	BIOCARTA_NOS1_PATHWAY		20	-0.222418	-0.222418	0.231518	0.336114	1	7379	tags=55%, list=33%, signal=82%
BIOCARTA_HIF_PATHWAY	BIOCARTA_HIF_PATHWAY		15	-0.222264	-0.222264	0.393075	0.335852	1	4005	tags=40%, list=18%, signal=49%
REACTOME_ACTIVATION_OF_ATR_IN_RESPONSE_TO_REPLICATION_STRESS	REACTOME_ACTIVATION_OF_ATR_IN_RESPONSE_TO_REPLICATION_STRESS		35	-0.221608	-0.221608	0.0553279	0.338888	1	14314	tags=86%, list=64%, signal=235%
BIOCARTA_MTOR_PATHWAY	BIOCARTA_MTOR_PATHWAY		23	-0.221402	-0.221402	0.203782	0.338759	1	10681	tags=70%, list=47%, signal=132%
REACTOME_TIE2_SIGNALING	REACTOME_TIE2_SIGNALING		15	-0.220903	-0.220903	0.391218	0.340553	1	17541	tags=100%, list=78%, signal=453%
PID_WNT_SIGNALING_PATHWAY	PID_WNT_SIGNALING_PATHWAY		26	-0.220266	-0.220266	0.123106	0.343567	1	7169	tags=54%, list=32%, signal=79%
REACTOME_SMAD2_SMAD3_SMAD4_HETEROTRIMER_REGULATES_TRANSCRIPTION	REACTOME_SMAD2_SMAD3_SMAD4_HETEROTRIMER_REGULATES_TRANSCRIPTION		25	-0.219956	-0.219956	0.142857	0.344351	1	11262	tags=72%, list=50%, signal=144%
PID_BMP_PATHWAY	PID_BMP_PATHWAY		41	-0.219557	-0.219557	0.0162602	0.34554	1	12087	tags=76%, list=54%, signal=163%
REACTOME_ACTIVATION_OF_GENES_BY_ATF4	REACTOME_ACTIVATION_OF_GENES_BY_ATF4		23	-0.219545	-0.219545	0.170974	0.343994	1	15616	tags=91%, list=69%, signal=298%
REACTOME_FRS2_MEDIATED_CASCADE	REACTOME_FRS2_MEDIATED_CASCADE		32	-0.219153	-0.219153	0.0847108	0.345336	1	7033	tags=53%, list=31%, signal=77%
WNT_SIGNALING	WNT_SIGNALING		81	-0.218219	-0.218219	0.00206612	0.350203	1	9557	tags=64%, list=42%, signal=111%
BIOCARTA_CTCF_PATHWAY	BIOCARTA_CTCF_PATHWAY		23	-0.217799	-0.217799	0.2	0.351552	1	10762	tags=70%, list=48%, signal=133%
BIOCARTA_GPCR_PATHWAY	BIOCARTA_GPCR_PATHWAY		34	-0.217706	-0.217706	0.0725191	0.350701	1	16293	tags=94%, list=72%, signal=340%
REACTOME_HS_GAG_BIOSYNTHESIS	REACTOME_HS_GAG_BIOSYNTHESIS		27	-0.217493	-0.217493	0.133065	0.350683	1	5949	tags=48%, list=26%, signal=65%
KEGG_N_GLYCAN_BIOSYNTHESIS	KEGG_N_GLYCAN_BIOSYNTHESIS		46	-0.217383	-0.217383	0.0224033	0.34984	1	13223	tags=80%, list=59%, signal=195%
REACTOME_ZINC_TRANSPORTERS	REACTOME_ZINC_TRANSPORTERS		15	-0.217258	-0.217258	0.423935	0.34917	1	10120	tags=67%, list=45%, signal=121%
BIOCARTA_P53_PATHWAY	BIOCARTA_P53_PATHWAY		16	-0.217148	-0.217148	0.355102	0.348295	1	7778	tags=56%, list=35%, signal=86%
REACTOME_DOWNSTREAM_TCR_SIGNALING	REACTOME_DOWNSTREAM_TCR_SIGNALING		36	-0.21646	-0.21646	0.0410959	0.35133	1	13894	tags=83%, list=62%, signal=217%
BIOCARTA_CDC42RAC_PATHWAY	BIOCARTA_CDC42RAC_PATHWAY		16	-0.216234	-0.216234	0.351738	0.35134	1	12019	tags=75%, list=53%, signal=161%
KEGG_PRIMARY_IMMUNODEFICIENCY	KEGG_PRIMARY_IMMUNODEFICIENCY		35	-0.21597	-0.21597	0.0763209	0.351781	1	4794	tags=43%, list=21%, signal=54%
PID_IL2_PI3K_PATHWAY	PID_IL2_PI3K_PATHWAY		33	-0.2153	-0.2153	0.0607287	0.354881	1	10850	tags=70%, list=48%, signal=134%
REACTOME_CELL_CYCLE	REACTOME_CELL_CYCLE		394	-0.215267	-0.215267	0	0.353565	1	11408	tags=72%, list=51%, signal=143%
REACTOME_KINESINS	REACTOME_KINESINS		23	-0.215146	-0.215146	0.209877	0.352955	1	9843	tags=65%, list=44%, signal=116%
PID_INTEGRIN1_PATHWAY	PID_INTEGRIN1_PATHWAY		64	-0.213147	-0.213147	0.00793651	0.365448	1	5768	tags=47%, list=26%, signal=63%
KEGG_CITRATE_CYCLE_TCA_CYCLE	KEGG_CITRATE_CYCLE_TCA_CYCLE		30	-0.212572	-0.212572	0.128459	0.367956	1	16231	tags=93%, list=72%, signal=334%
REACTOME_SIGNALING_BY_FGFR1_MUTANTS	REACTOME_SIGNALING_BY_FGFR1_MUTANTS		27	-0.211458	-0.211458	0.158898	0.374362	1	15255	tags=89%, list=68%, signal=275%
REACTOME_G2_M_CHECKPOINTS	REACTOME_G2_M_CHECKPOINTS		41	-0.210611	-0.210611	0.0517598	0.378847	1	14484	tags=85%, list=64%, signal=239%
BIOCARTA_STATHMIN_PATHWAY	BIOCARTA_STATHMIN_PATHWAY		19	-0.210217	-0.210217	0.320564	0.380377	1	3566	tags=37%, list=16%, signal=44%
REACTOME_RNA_POL_II_TRANSCRIPTION	REACTOME_RNA_POL_II_TRANSCRIPTION		101	-0.209898	-0.209898	0	0.381103	1	15578	tags=90%, list=69%, signal=291%
REACTOME_METABOLISM_OF_NON_CODING_RNA	REACTOME_METABOLISM_OF_NON_CODING_RNA		48	-0.208612	-0.208612	0.0214425	0.38879	1	13135	tags=79%, list=58%, signal=190%
PID_AP1_PATHWAY	PID_AP1_PATHWAY		67	-0.208542	-0.208542	0.00417537	0.387634	1	2040	tags=30%, list=9%, signal=33%
REACTOME_SIGNALING_BY_FGFR_MUTANTS	REACTOME_SIGNALING_BY_FGFR_MUTANTS		39	-0.208473	-0.208473	0.0513347	0.386523	1	15517	tags=90%, list=69%, signal=288%
REACTOME_MRNA_CAPPING	REACTOME_MRNA_CAPPING		29	-0.20817	-0.20817	0.12782	0.387146	1	16278	tags=93%, list=72%, signal=336%
REACTOME_EXTENSION_OF_TELOMERES	REACTOME_EXTENSION_OF_TELOMERES		27	-0.207826	-0.207826	0.161677	0.388254	1	14503	tags=85%, list=64%, signal=239%
PID_NECTIN_PATHWAY	PID_NECTIN_PATHWAY		30	-0.20754	-0.20754	0.127953	0.388964	1	11092	tags=70%, list=49%, signal=138%
PID_HIF1_TFPATHWAY	PID_HIF1_TFPATHWAY		64	-0.207442	-0.207442	0.0133588	0.388037	1	11875	tags=73%, list=53%, signal=155%
BIOCARTA_LAIR_PATHWAY	BIOCARTA_LAIR_PATHWAY		16	-0.206789	-0.206789	0.42449	0.391359	1	8011	tags=56%, list=36%, signal=87%
BIOCARTA_ATM_PATHWAY	BIOCARTA_ATM_PATHWAY		20	-0.206752	-0.206752	0.339623	0.390058	1	14484	tags=85%, list=64%, signal=238%
REACTOME_CELL_CYCLE_MITOTIC	REACTOME_CELL_CYCLE_MITOTIC		307	-0.206554	-0.206554	0	0.389932	1	11472	tags=71%, list=51%, signal=143%
REACTOME_SIGNALING_BY_TGF_BETA_RECEPTOR_COMPLEX	REACTOME_SIGNALING_BY_TGF_BETA_RECEPTOR_COMPLEX		60	-0.206136	-0.206136	0.0143443	0.391467	1	16757	tags=95%, list=74%, signal=371%
PID_AURORA_A_PATHWAY	PID_AURORA_A_PATHWAY		30	-0.20609	-0.20609	0.147002	0.390276	1	17127	tags=97%, list=76%, signal=404%
BIOCARTA_AKAPCENTROSOME_PATHWAY	BIOCARTA_AKAPCENTROSOME_PATHWAY		15	-0.20569	-0.20569	0.512974	0.391703	1	7379	tags=53%, list=33%, signal=79%
REACTOME_TCA_CYCLE_AND_RESPIRATORY_ELECTRON_TRANSPORT	REACTOME_TCA_CYCLE_AND_RESPIRATORY_ELECTRON_TRANSPORT		117	-0.205547	-0.205547	0	0.391181	1	15214	tags=88%, list=68%, signal=270%
KEGG_NUCLEOTIDE_EXCISION_REPAIR	KEGG_NUCLEOTIDE_EXCISION_REPAIR		44	-0.205432	-0.205432	0.0230769	0.390564	1	14314	tags=84%, list=64%, signal=231%
BIOCARTA_CALCINEURIN_PATHWAY	BIOCARTA_CALCINEURIN_PATHWAY		18	-0.205393	-0.205393	0.369478	0.389442	1	11638	tags=72%, list=52%, signal=149%
PID_AR_TF_PATHWAY	PID_AR_TF_PATHWAY		49	-0.20513	-0.20513	0.0314342	0.389769	1	11931	tags=73%, list=53%, signal=156%
PID_HIF1A_PATHWAY	PID_HIF1A_PATHWAY		19	-0.204491	-0.204491	0.347475	0.392769	1	17911	tags=100%, list=80%, signal=489%
KEGG_DNA_REPLICATION	KEGG_DNA_REPLICATION		36	-0.204112	-0.204112	0.0935673	0.394161	1	15422	tags=89%, list=69%, signal=282%
REACTOME_REGULATION_OF_HYPOXIA_INDUCIBLE_FACTOR_HIF_BY_OXYGEN	REACTOME_REGULATION_OF_HYPOXIA_INDUCIBLE_FACTOR_HIF_BY_OXYGEN		23	-0.203847	-0.203847	0.279749	0.394703	1	15969	tags=91%, list=71%, signal=314%
BIOCARTA_CD40_PATHWAY	BIOCARTA_CD40_PATHWAY		15	-0.202703	-0.202703	0.526839	0.401727	1	11948	tags=73%, list=53%, signal=156%
BIOCARTA_41BB_PATHWAY	BIOCARTA_41BB_PATHWAY		15	-0.202703	-0.202703	0.48996	0.4002	1	11948	tags=73%, list=53%, signal=156%
PID_ATF2_PATHWAY	PID_ATF2_PATHWAY		56	-0.202686	-0.202686	0.0140281	0.398817	1	11126	tags=70%, list=49%, signal=137%
REACTOME_DESTABILIZATION_OF_MRNA_BY_BRF1	REACTOME_DESTABILIZATION_OF_MRNA_BY_BRF1		17	-0.2026	-0.2026	0.460474	0.397973	1	15305	tags=88%, list=68%, signal=275%
REACTOME_DESTABILIZATION_OF_MRNA_BY_TRISTETRAPROLIN_TTP	REACTOME_DESTABILIZATION_OF_MRNA_BY_TRISTETRAPROLIN_TTP		17	-0.2026	-0.2026	0.427419	0.396477	1	15305	tags=88%, list=68%, signal=275%
PID_IL23_PATHWAY	PID_IL23_PATHWAY		33	-0.201803	-0.201803	0.137931	0.401079	1	8425	tags=58%, list=37%, signal=92%
REACTOME_SHC_RELATED_EVENTS	REACTOME_SHC_RELATED_EVENTS		16	-0.201604	-0.201604	0.478846	0.401141	1	5314	tags=44%, list=24%, signal=57%
BIOCARTA_CCR5_PATHWAY	BIOCARTA_CCR5_PATHWAY		17	-0.201428	-0.201428	0.428858	0.400933	1	7387	tags=53%, list=33%, signal=79%
KEGG_PARKINSONS_DISEASE	KEGG_PARKINSONS_DISEASE		109	-0.199885	-0.199885	0	0.41111	1	14935	tags=86%, list=66%, signal=255%
KEGG_ALLOGRAFT_REJECTION	KEGG_ALLOGRAFT_REJECTION		35	-0.199344	-0.199344	0.1167	0.413934	1	7097	tags=51%, list=32%, signal=75%
REACTOME_GROWTH_HORMONE_RECEPTOR_SIGNALING	REACTOME_GROWTH_HORMONE_RECEPTOR_SIGNALING		23	-0.199289	-0.199289	0.325866	0.412826	1	3349	tags=35%, list=15%, signal=41%
REACTOME_REGULATION_OF_MRNA_STABILITY_BY_PROTEINS_THAT_BIND_AU_RICH_ELEMENTS	REACTOME_REGULATION_OF_MRNA_STABILITY_BY_PROTEINS_THAT_BIND_AU_RICH_ELEMENTS		81	-0.198963	-0.198963	0	0.413661	1	14713	tags=85%, list=65%, signal=245%
REACTOME_MAPK_TARGETS_NUCLEAR_EVENTS_MEDIATED_BY_MAP_KINASES	REACTOME_MAPK_TARGETS_NUCLEAR_EVENTS_MEDIATED_BY_MAP_KINASES		30	-0.198568	-0.198568	0.163968	0.415103	1	12044	tags=73%, list=54%, signal=158%
REACTOME_ENOS_ACTIVATION_AND_REGULATION	REACTOME_ENOS_ACTIVATION_AND_REGULATION		19	-0.19813	-0.19813	0.426104	0.417101	1	14500	tags=84%, list=64%, signal=236%
REACTOME_ACTIVATION_OF_KAINATE_RECEPTORS_UPON_GLUTAMATE_BINDING	REACTOME_ACTIVATION_OF_KAINATE_RECEPTORS_UPON_GLUTAMATE_BINDING		31	-0.197189	-0.197189	0.162741	0.423101	1	13721	tags=81%, list=61%, signal=206%
REACTOME_STEROID_HORMONES	REACTOME_STEROID_HORMONES		25	-0.19678	-0.19678	0.234177	0.424803	1	9082	tags=60%, list=40%, signal=100%
REACTOME_TRANSPORT_OF_RIBONUCLEOPROTEINS_INTO_THE_HOST_NUCLEUS	REACTOME_TRANSPORT_OF_RIBONUCLEOPROTEINS_INTO_THE_HOST_NUCLEUS		27	-0.196691	-0.196691	0.189036	0.424035	1	13086	tags=78%, list=58%, signal=186%
REACTOME_PYRUVATE_METABOLISM	REACTOME_PYRUVATE_METABOLISM		18	-0.195967	-0.195967	0.456	0.42854	1	16852	tags=94%, list=75%, signal=375%
BIOCARTA_SHH_PATHWAY	BIOCARTA_SHH_PATHWAY		16	-0.195575	-0.195575	0.548638	0.430091	1	2636	tags=31%, list=12%, signal=35%
PID_GLYPICAN_1PATHWAY	PID_GLYPICAN_1PATHWAY		26	-0.195115	-0.195115	0.236434	0.432016	1	6003	tags=46%, list=27%, signal=63%
PID_FRA_PATHWAY	PID_FRA_PATHWAY		36	-0.194878	-0.194878	0.101562	0.43254	1	9377	tags=61%, list=42%, signal=105%
BIOCARTA_TEL_PATHWAY	BIOCARTA_TEL_PATHWAY		18	-0.194767	-0.194767	0.521042	0.431827	1	4374	tags=39%, list=19%, signal=48%
KEGG_SPLICEOSOME	KEGG_SPLICEOSOME		125	-0.194312	-0.194312	0	0.433805	1	14379	tags=83%, list=64%, signal=229%
REACTOME_SYNTHESIS_OF_GLYCOSYLPHOSPHATIDYLINOSITOL_GPI	REACTOME_SYNTHESIS_OF_GLYCOSYLPHOSPHATIDYLINOSITOL_GPI		17	-0.194108	-0.194108	0.447581	0.433866	1	15496	tags=88%, list=69%, signal=283%
ST_MYOCYTE_AD_PATHWAY	ST_MYOCYTE_AD_PATHWAY		24	-0.193924	-0.193924	0.262626	0.433878	1	15336	tags=88%, list=68%, signal=274%
PID_ATM_PATHWAY	PID_ATM_PATHWAY		34	-0.193809	-0.193809	0.0928854	0.433279	1	14844	tags=85%, list=66%, signal=250%
BIOCARTA_MPR_PATHWAY	BIOCARTA_MPR_PATHWAY		34	-0.193681	-0.193681	0.121723	0.432767	1	17495	tags=97%, list=78%, signal=435%
PID_FOXO_PATHWAY	PID_FOXO_PATHWAY		49	-0.193329	-0.193329	0.0547667	0.43401	1	15871	tags=90%, list=71%, signal=304%
PID_CMYB_PATHWAY	PID_CMYB_PATHWAY		82	-0.192692	-0.192692	0.00591716	0.437471	1	11875	tags=72%, list=53%, signal=152%
REACTOME_NEPHRIN_INTERACTIONS	REACTOME_NEPHRIN_INTERACTIONS		19	-0.192659	-0.192659	0.43787	0.436178	1	11069	tags=68%, list=49%, signal=135%
REACTOME_ACTIVATED_NOTCH1_TRANSMITS_SIGNAL_TO_THE_NUCLEUS	REACTOME_ACTIVATED_NOTCH1_TRANSMITS_SIGNAL_TO_THE_NUCLEUS		26	-0.192292	-0.192292	0.25098	0.437729	1	4335	tags=38%, list=19%, signal=48%
PID_IL27_PATHWAY	PID_IL27_PATHWAY		23	-0.192218	-0.192218	0.338843	0.436716	1	3508	tags=35%, list=16%, signal=41%
REACTOME_FORMATION_OF_THE_HIV1_EARLY_ELONGATION_COMPLEX	REACTOME_FORMATION_OF_THE_HIV1_EARLY_ELONGATION_COMPLEX		33	-0.192051	-0.192051	0.142578	0.436573	1	14783	tags=85%, list=66%, signal=247%
REACTOME_G_BETA_GAMMA_SIGNALLING_THROUGH_PLC_BETA	REACTOME_G_BETA_GAMMA_SIGNALLING_THROUGH_PLC_BETA		20	-0.191965	-0.191965	0.381818	0.435728	1	15942	tags=90%, list=71%, signal=308%
BIOCARTA_PTEN_PATHWAY	BIOCARTA_PTEN_PATHWAY		18	-0.191832	-0.191832	0.453125	0.435393	1	14444	tags=83%, list=64%, signal=232%
REACTOME_N_GLYCAN_ANTENNAE_ELONGATION_IN_THE_MEDIAL_TRANS_GOLGI	REACTOME_N_GLYCAN_ANTENNAE_ELONGATION_IN_THE_MEDIAL_TRANS_GOLGI		17	-0.190954	-0.190954	0.518219	0.440947	1	16891	tags=94%, list=75%, signal=377%
REACTOME_ABCA_TRANSPORTERS_IN_LIPID_HOMEOSTASIS	REACTOME_ABCA_TRANSPORTERS_IN_LIPID_HOMEOSTASIS		17	-0.190666	-0.190666	0.527495	0.44167	1	6305	tags=47%, list=28%, signal=65%
PID_BETA_CATENIN_NUC_PATHWAY	PID_BETA_CATENIN_NUC_PATHWAY		75	-0.190313	-0.190313	0.014	0.443088	1	11938	tags=72%, list=53%, signal=153%
BIOCARTA_CSK_PATHWAY	BIOCARTA_CSK_PATHWAY		23	-0.189438	-0.189438	0.343313	0.44885	1	16293	tags=91%, list=72%, signal=330%
BIOCARTA_NDKDYNAMIN_PATHWAY	BIOCARTA_NDKDYNAMIN_PATHWAY		18	-0.189431	-0.189431	0.473161	0.447398	1	6995	tags=50%, list=31%, signal=72%
PID_IL12_2PATHWAY	PID_IL12_2PATHWAY		61	-0.189327	-0.189327	0.0222222	0.446808	1	5345	tags=43%, list=24%, signal=56%
PID_S1P_S1P2_PATHWAY	PID_S1P_S1P2_PATHWAY		24	-0.189215	-0.189215	0.307692	0.446154	1	7001	tags=50%, list=31%, signal=72%
BIOCARTA_MEF2D_PATHWAY	BIOCARTA_MEF2D_PATHWAY		19	-0.18909	-0.18909	0.440404	0.445648	1	15888	tags=89%, list=71%, signal=304%
KEGG_RNA_DEGRADATION	KEGG_RNA_DEGRADATION		57	-0.188388	-0.188388	0.0196464	0.449651	1	11962	tags=72%, list=53%, signal=153%
REACTOME_REGULATION_OF_GLUCOKINASE_BY_GLUCOKINASE_REGULATORY_PROTEIN	REACTOME_REGULATION_OF_GLUCOKINASE_BY_GLUCOKINASE_REGULATORY_PROTEIN		26	-0.188125	-0.188125	0.285714	0.450367	1	13086	tags=77%, list=58%, signal=184%
PID_SYNDECAN_3_PATHWAY	PID_SYNDECAN_3_PATHWAY		15	-0.18749	-0.18749	0.588235	0.453805	1	9289	tags=60%, list=41%, signal=102%
REACTOME_ION_TRANSPORT_BY_P_TYPE_ATPASES	REACTOME_ION_TRANSPORT_BY_P_TYPE_ATPASES		33	-0.187416	-0.187416	0.194274	0.452922	1	6020	tags=45%, list=27%, signal=62%
REACTOME_TRANSPORT_TO_THE_GOLGI_AND_SUBSEQUENT_MODIFICATION	REACTOME_TRANSPORT_TO_THE_GOLGI_AND_SUBSEQUENT_MODIFICATION		32	-0.1874	-0.1874	0.210526	0.451586	1	16891	tags=94%, list=75%, signal=375%
REACTOME_ADP_SIGNALLING_THROUGH_P2RY1	REACTOME_ADP_SIGNALLING_THROUGH_P2RY1		25	-0.187075	-0.187075	0.298387	0.452751	1	13802	tags=80%, list=61%, signal=207%
REACTOME_REGULATION_OF_INSULIN_SECRETION_BY_GLUCAGON_LIKE_PEPTIDE1	REACTOME_REGULATION_OF_INSULIN_SECRETION_BY_GLUCAGON_LIKE_PEPTIDE1		40	-0.18705	-0.18705	0.0996094	0.451505	1	16619	tags=93%, list=74%, signal=353%
REACTOME_METAL_ION_SLC_TRANSPORTERS	REACTOME_METAL_ION_SLC_TRANSPORTERS		22	-0.186993	-0.186993	0.385932	0.450465	1	10120	tags=64%, list=45%, signal=116%
KEGG_ADHERENS_JUNCTION	KEGG_ADHERENS_JUNCTION		72	-0.186851	-0.186851	0.00948767	0.450146	1	13003	tags=76%, list=58%, signal=180%
ST_WNT_BETA_CATENIN_PATHWAY	ST_WNT_BETA_CATENIN_PATHWAY		33	-0.186765	-0.186765	0.174168	0.449478	1	16266	tags=91%, list=72%, signal=327%
KEGG_STARCH_AND_SUCROSE_METABOLISM	KEGG_STARCH_AND_SUCROSE_METABOLISM		46	-0.186317	-0.186317	0.0882957	0.451858	1	2177	tags=28%, list=10%, signal=31%
KEGG_TYPE_I_DIABETES_MELLITUS	KEGG_TYPE_I_DIABETES_MELLITUS		39	-0.186087	-0.186087	0.124	0.452386	1	8517	tags=56%, list=38%, signal=91%
REACTOME_SHC1_EVENTS_IN_ERBB4_SIGNALING	REACTOME_SHC1_EVENTS_IN_ERBB4_SIGNALING		19	-0.18517	-0.18517	0.498054	0.458302	1	5314	tags=42%, list=24%, signal=55%
BIOCARTA_GLEEVEC_PATHWAY	BIOCARTA_GLEEVEC_PATHWAY		23	-0.184621	-0.184621	0.384615	0.461	1	14444	tags=83%, list=64%, signal=230%
REACTOME_FORMATION_OF_RNA_POL_II_ELONGATION_COMPLEX_	REACTOME_FORMATION_OF_RNA_POL_II_ELONGATION_COMPLEX_		43	-0.184196	-0.184196	0.0899796	0.463071	1	16278	tags=91%, list=72%, signal=327%
PID_PTP1B_PATHWAY	PID_PTP1B_PATHWAY		50	-0.183889	-0.183889	0.0722892	0.46406	1	5775	tags=44%, list=26%, signal=59%
PID_CIRCADIAN_PATHWAY	PID_CIRCADIAN_PATHWAY		16	-0.183532	-0.183532	0.561368	0.465623	1	16975	tags=94%, list=75%, signal=381%
PID_NCADHERIN_PATHWAY	PID_NCADHERIN_PATHWAY		30	-0.183505	-0.183505	0.235931	0.464357	1	10882	tags=67%, list=48%, signal=129%
REACTOME_METABOLISM_OF_STEROID_HORMONES_AND_VITAMINS_A_AND_D	REACTOME_METABOLISM_OF_STEROID_HORMONES_AND_VITAMINS_A_AND_D		29	-0.183004	-0.183004	0.254473	0.467063	1	9082	tags=59%, list=40%, signal=98%
PID_HEDGEHOG_2PATHWAY	PID_HEDGEHOG_2PATHWAY		22	-0.182693	-0.182693	0.391566	0.468298	1	5101	tags=41%, list=23%, signal=53%
KEGG_MISMATCH_REPAIR	KEGG_MISMATCH_REPAIR		23	-0.182693	-0.182693	0.410506	0.466857	1	15466	tags=87%, list=69%, signal=278%
REACTOME_GLOBAL_GENOMIC_NER_GG_NER	REACTOME_GLOBAL_GENOMIC_NER_GG_NER		33	-0.18257	-0.18257	0.22334	0.466456	1	14314	tags=82%, list=64%, signal=224%
KEGG_CYSTEINE_AND_METHIONINE_METABOLISM	KEGG_CYSTEINE_AND_METHIONINE_METABOLISM		34	-0.18196	-0.18196	0.170635	0.469992	1	8490	tags=56%, list=38%, signal=90%
REACTOME_CHEMOKINE_RECEPTORS_BIND_CHEMOKINES	REACTOME_CHEMOKINE_RECEPTORS_BIND_CHEMOKINES		53	-0.181442	-0.181442	0.0732218	0.472665	1	2297	tags=28%, list=10%, signal=31%
KEGG_ECM_RECEPTOR_INTERACTION	KEGG_ECM_RECEPTOR_INTERACTION		84	-0.181435	-0.181435	0.00414079	0.471282	1	5847	tags=44%, list=26%, signal=59%
BIOCARTA_G2_PATHWAY	BIOCARTA_G2_PATHWAY		24	-0.181326	-0.181326	0.412574	0.470818	1	17495	tags=96%, list=78%, signal=430%
PID_INSULIN_GLUCOSE_PATHWAY	PID_INSULIN_GLUCOSE_PATHWAY		25	-0.180607	-0.180607	0.346693	0.475245	1	10346	tags=64%, list=46%, signal=118%
REACTOME_NUCLEOTIDE_EXCISION_REPAIR	REACTOME_NUCLEOTIDE_EXCISION_REPAIR		49	-0.180412	-0.180412	0.0842333	0.47552	1	14783	tags=84%, list=66%, signal=243%
REACTOME_ASPARAGINE_N_LINKED_GLYCOSYLATION	REACTOME_ASPARAGINE_N_LINKED_GLYCOSYLATION		79	-0.180056	-0.180056	0.0120724	0.477024	1	8499	tags=56%, list=38%, signal=89%
BIOCARTA_IGF1R_PATHWAY	BIOCARTA_IGF1R_PATHWAY		23	-0.179505	-0.179505	0.404858	0.479967	1	17495	tags=96%, list=78%, signal=429%
BIOCARTA_AMI_PATHWAY	BIOCARTA_AMI_PATHWAY		17	-0.179185	-0.179185	0.552529	0.481266	1	1267	tags=24%, list=6%, signal=25%
REACTOME_GLUCAGON_TYPE_LIGAND_RECEPTORS	REACTOME_GLUCAGON_TYPE_LIGAND_RECEPTORS		27	-0.178899	-0.178899	0.300813	0.482022	1	10985	tags=67%, list=49%, signal=130%
BIOCARTA_AGR_PATHWAY	BIOCARTA_AGR_PATHWAY		35	-0.178811	-0.178811	0.177143	0.481275	1	4986	tags=40%, list=22%, signal=51%
ST_GRANULE_CELL_SURVIVAL_PATHWAY	ST_GRANULE_CELL_SURVIVAL_PATHWAY		27	-0.178691	-0.178691	0.30099	0.480923	1	10156	tags=63%, list=45%, signal=115%
REACTOME_PHASE1_FUNCTIONALIZATION_OF_COMPOUNDS	REACTOME_PHASE1_FUNCTIONALIZATION_OF_COMPOUNDS		60	-0.178598	-0.178598	0.0239044	0.480307	1	6871	tags=48%, list=31%, signal=69%
PID_CD8_TCR_DOWNSTREAM_PATHWAY	PID_CD8_TCR_DOWNSTREAM_PATHWAY		51	-0.178571	-0.178571	0.0616016	0.479129	1	3935	tags=35%, list=17%, signal=43%
REACTOME_ANTIGEN_PROCESSING_CROSS_PRESENTATION	REACTOME_ANTIGEN_PROCESSING_CROSS_PRESENTATION		72	-0.177876	-0.177876	0.0191571	0.483509	1	11016	tags=67%, list=49%, signal=130%
PID_AR_PATHWAY	PID_AR_PATHWAY		59	-0.177789	-0.177789	0.0403071	0.482893	1	12033	tags=71%, list=53%, signal=153%
REACTOME_GLYCOLYSIS	REACTOME_GLYCOLYSIS		26	-0.177187	-0.177187	0.35743	0.486564	1	9869	tags=62%, list=44%, signal=109%
BIOCARTA_TH1TH2_PATHWAY	BIOCARTA_TH1TH2_PATHWAY		17	-0.176696	-0.176696	0.619802	0.489048	1	1323	tags=24%, list=6%, signal=25%
BIOCARTA_MTA3_PATHWAY	BIOCARTA_MTA3_PATHWAY		18	-0.176115	-0.176115	0.612774	0.492549	1	6044	tags=44%, list=27%, signal=61%
REACTOME_INSULIN_SYNTHESIS_AND_PROCESSING	REACTOME_INSULIN_SYNTHESIS_AND_PROCESSING		19	-0.175795	-0.175795	0.559223	0.493919	1	16187	tags=89%, list=72%, signal=318%
REACTOME_HOST_INTERACTIONS_OF_HIV_FACTORS	REACTOME_HOST_INTERACTIONS_OF_HIV_FACTORS		120	-0.175546	-0.175546	0	0.494656	1	11827	tags=70%, list=53%, signal=147%
PID_P38_MK2_PATHWAY	PID_P38_MK2_PATHWAY		20	-0.175235	-0.175235	0.519084	0.495966	1	10691	tags=65%, list=47%, signal=124%
REACTOME_REGULATION_OF_WATER_BALANCE_BY_RENAL_AQUAPORINS	REACTOME_REGULATION_OF_WATER_BALANCE_BY_RENAL_AQUAPORINS		42	-0.1752	-0.1752	0.152263	0.494842	1	9463	tags=60%, list=42%, signal=103%
BIOCARTA_CHREBP2_PATHWAY	BIOCARTA_CHREBP2_PATHWAY		41	-0.174871	-0.174871	0.135354	0.496153	1	10346	tags=63%, list=46%, signal=117%
BIOCARTA_IL2_PATHWAY	BIOCARTA_IL2_PATHWAY		21	-0.174538	-0.174538	0.510204	0.497514	1	18585	tags=100%, list=83%, signal=573%
REACTOME_GLUCONEOGENESIS	REACTOME_GLUCONEOGENESIS		30	-0.174296	-0.174296	0.255965	0.498003	1	3586	tags=33%, list=16%, signal=40%
PID_NEPHRIN_NEPH1_PATHWAY	PID_NEPHRIN_NEPH1_PATHWAY		30	-0.173388	-0.173388	0.27112	0.504202	1	12610	tags=73%, list=56%, signal=167%
REACTOME_THROMBOXANE_SIGNALLING_THROUGH_TP_RECEPTOR	REACTOME_THROMBOXANE_SIGNALLING_THROUGH_TP_RECEPTOR		23	-0.173252	-0.173252	0.456067	0.503864	1	13721	tags=78%, list=61%, signal=200%
REACTOME_ACTIVATION_OF_NMDA_RECEPTOR_UPON_GLUTAMATE_BINDING_AND_POSTSYNAPTIC_EVENTS	REACTOME_ACTIVATION_OF_NMDA_RECEPTOR_UPON_GLUTAMATE_BINDING_AND_POSTSYNAPTIC_EVENTS		35	-0.172523	-0.172523	0.230469	0.50886	1	8986	tags=57%, list=40%, signal=95%
KEGG_OOCYTE_MEIOSIS	KEGG_OOCYTE_MEIOSIS		106	-0.172388	-0.172388	0	0.508604	1	14401	tags=81%, list=64%, signal=224%
REACTOME_SYNTHESIS_OF_PA	REACTOME_SYNTHESIS_OF_PA		24	-0.172054	-0.172054	0.456432	0.510108	1	13952	tags=79%, list=62%, signal=208%
NABA_ECM_GLYCOPROTEINS	NABA_ECM_GLYCOPROTEINS		174	-0.171643	-0.171643	0	0.51235	1	3541	tags=33%, list=16%, signal=39%
KEGG_HEMATOPOIETIC_CELL_LINEAGE	KEGG_HEMATOPOIETIC_CELL_LINEAGE		85	-0.171604	-0.171604	0.0152174	0.511201	1	1714	tags=25%, list=8%, signal=27%
REACTOME_KERATAN_SULFATE_KERATIN_METABOLISM	REACTOME_KERATAN_SULFATE_KERATIN_METABOLISM		30	-0.171146	-0.171146	0.291667	0.51359	1	6658	tags=47%, list=30%, signal=66%
PID_P73PATHWAY	PID_P73PATHWAY		79	-0.170996	-0.170996	0.0140562	0.513519	1	9557	tags=59%, list=42%, signal=103%
REACTOME_MUSCLE_CONTRACTION	REACTOME_MUSCLE_CONTRACTION		43	-0.17047	-0.17047	0.12381	0.516693	1	7164	tags=49%, list=32%, signal=72%
REACTOME_SEMA4D_INDUCED_CELL_MIGRATION_AND_GROWTH_CONE_COLLAPSE	REACTOME_SEMA4D_INDUCED_CELL_MIGRATION_AND_GROWTH_CONE_COLLAPSE		25	-0.170192	-0.170192	0.395303	0.517626	1	5178	tags=40%, list=23%, signal=52%
KEGG_WNT_SIGNALING_PATHWAY	KEGG_WNT_SIGNALING_PATHWAY		144	-0.169738	-0.169738	0	0.519943	1	9804	tags=60%, list=44%, signal=106%
BIOCARTA_CDMAC_PATHWAY	BIOCARTA_CDMAC_PATHWAY		16	-0.169314	-0.169314	0.727459	0.52189	1	15888	tags=88%, list=71%, signal=297%
KEGG_ARRHYTHMOGENIC_RIGHT_VENTRICULAR_CARDIOMYOPATHY_ARVC	KEGG_ARRHYTHMOGENIC_RIGHT_VENTRICULAR_CARDIOMYOPATHY_ARVC		72	-0.169313	-0.169313	0.0257937	0.520468	1	4643	tags=38%, list=21%, signal=47%
PID_SHP2_PATHWAY	PID_SHP2_PATHWAY		53	-0.169116	-0.169116	0.0931174	0.520695	1	5122	tags=40%, list=23%, signal=51%
KEGG_GLYCOSYLPHOSPHATIDYLINOSITOL_GPI_ANCHOR_BIOSYNTHESIS	KEGG_GLYCOSYLPHOSPHATIDYLINOSITOL_GPI_ANCHOR_BIOSYNTHESIS		25	-0.169094	-0.169094	0.398422	0.519466	1	16007	tags=88%, list=71%, signal=304%
PID_IL12_STAT4_PATHWAY	PID_IL12_STAT4_PATHWAY		31	-0.169066	-0.169066	0.294466	0.518321	1	5640	tags=42%, list=25%, signal=56%
REACTOME_TRANSPORT_OF_MATURE_MRNA_DERIVED_FROM_AN_INTRONLESS_TRANSCRIPT	REACTOME_TRANSPORT_OF_MATURE_MRNA_DERIVED_FROM_AN_INTRONLESS_TRANSCRIPT		32	-0.168917	-0.168917	0.30572	0.518217	1	13086	tags=75%, list=58%, signal=179%
REACTOME_THROMBIN_SIGNALLING_THROUGH_PROTEINASE_ACTIVATED_RECEPTORS_PARS	REACTOME_THROMBIN_SIGNALLING_THROUGH_PROTEINASE_ACTIVATED_RECEPTORS_PARS		32	-0.168749	-0.168749	0.291751	0.518337	1	15200	tags=84%, list=68%, signal=259%
REACTOME_DOWNSTREAM_SIGNALING_EVENTS_OF_B_CELL_RECEPTOR_BCR	REACTOME_DOWNSTREAM_SIGNALING_EVENTS_OF_B_CELL_RECEPTOR_BCR		93	-0.168512	-0.168512	0.00407332	0.518966	1	13892	tags=78%, list=62%, signal=204%
PID_EPHA_FWDPATHWAY	PID_EPHA_FWDPATHWAY		33	-0.168268	-0.168268	0.317073	0.519547	1	3722	tags=33%, list=17%, signal=40%
KEGG_BASAL_TRANSCRIPTION_FACTORS	KEGG_BASAL_TRANSCRIPTION_FACTORS		33	-0.167694	-0.167694	0.254202	0.523119	1	11920	tags=70%, list=53%, signal=148%
REACTOME_CIRCADIAN_CLOCK	REACTOME_CIRCADIAN_CLOCK		51	-0.16739	-0.16739	0.104208	0.524472	1	16544	tags=90%, list=73%, signal=340%
REACTOME_RNA_POL_II_TRANSCRIPTION_PRE_INITIATION_AND_PROMOTER_OPENING	REACTOME_RNA_POL_II_TRANSCRIPTION_PRE_INITIATION_AND_PROMOTER_OPENING		40	-0.167338	-0.167338	0.155602	0.523442	1	14811	tags=83%, list=66%, signal=241%
REACTOME_VOLTAGE_GATED_POTASSIUM_CHANNELS	REACTOME_VOLTAGE_GATED_POTASSIUM_CHANNELS		35	-0.167098	-0.167098	0.279297	0.524013	1	3963	tags=34%, list=18%, signal=42%
REACTOME_ANTIVIRAL_MECHANISM_BY_IFN_STIMULATED_GENES	REACTOME_ANTIVIRAL_MECHANISM_BY_IFN_STIMULATED_GENES		65	-0.166887	-0.166887	0.0355731	0.524505	1	13570	tags=77%, list=60%, signal=193%
REACTOME_BIOSYNTHESIS_OF_THE_N_GLYCAN_PRECURSOR_DOLICHOL_LIPID_LINKED_OLIGOSACCHARIDE_LLO_AND_TRANSFER_TO_A_NASCENT_PROTEIN	REACTOME_BIOSYNTHESIS_OF_THE_N_GLYCAN_PRECURSOR_DOLICHOL_LIPID_LINKED_OLIGOSACCHARIDE_LLO_AND_TRANSFER_TO_A_NASCENT_PROTEIN		28	-0.166703	-0.166703	0.364522	0.524786	1	13939	tags=79%, list=62%, signal=206%
PID_HIF2PATHWAY	PID_HIF2PATHWAY		34	-0.16642	-0.16642	0.272901	0.52593	1	2881	tags=29%, list=13%, signal=34%
KEGG_UBIQUITIN_MEDIATED_PROTEOLYSIS	KEGG_UBIQUITIN_MEDIATED_PROTEOLYSIS		131	-0.166087	-0.166087	0.00411523	0.527331	1	18106	tags=97%, list=80%, signal=493%
KEGG_CARDIAC_MUSCLE_CONTRACTION	KEGG_CARDIAC_MUSCLE_CONTRACTION		65	-0.166087	-0.166087	0.03125	0.525954	1	7701	tags=51%, list=34%, signal=77%
REACTOME_PYRUVATE_METABOLISM_AND_CITRIC_ACID_TCA_CYCLE	REACTOME_PYRUVATE_METABOLISM_AND_CITRIC_ACID_TCA_CYCLE		40	-0.165825	-0.165825	0.264706	0.526848	1	14845	tags=83%, list=66%, signal=242%
REACTOME_OXYGEN_DEPENDENT_PROLINE_HYDROXYLATION_OF_HYPOXIA_INDUCIBLE_FACTOR_ALPHA	REACTOME_OXYGEN_DEPENDENT_PROLINE_HYDROXYLATION_OF_HYPOXIA_INDUCIBLE_FACTOR_ALPHA		16	-0.165713	-0.165713	0.687259	0.526429	1	15969	tags=88%, list=71%, signal=301%
BIOCARTA_FAS_PATHWAY	BIOCARTA_FAS_PATHWAY		30	-0.165639	-0.165639	0.349908	0.525665	1	17286	tags=93%, list=77%, signal=402%
REACTOME_BASIGIN_INTERACTIONS	REACTOME_BASIGIN_INTERACTIONS		24	-0.165299	-0.165299	0.467909	0.527253	1	13166	tags=75%, list=58%, signal=180%
REACTOME_COSTIMULATION_BY_THE_CD28_FAMILY	REACTOME_COSTIMULATION_BY_THE_CD28_FAMILY		62	-0.165252	-0.165252	0.0645793	0.526338	1	14444	tags=81%, list=64%, signal=224%
PID_IL2_1PATHWAY	PID_IL2_1PATHWAY		53	-0.164961	-0.164961	0.086785	0.527578	1	5640	tags=42%, list=25%, signal=55%
REACTOME_G_BETA_GAMMA_SIGNALLING_THROUGH_PI3KGAMMA	REACTOME_G_BETA_GAMMA_SIGNALLING_THROUGH_PI3KGAMMA		25	-0.164942	-0.164942	0.483034	0.526368	1	15200	tags=84%, list=68%, signal=258%
PID_ARF6_DOWNSTREAM_PATHWAY	PID_ARF6_DOWNSTREAM_PATHWAY		15	-0.164319	-0.164319	0.762	0.530451	1	14312	tags=80%, list=64%, signal=220%
REACTOME_SHC_MEDIATED_SIGNALLING	REACTOME_SHC_MEDIATED_SIGNALLING		15	-0.16407	-0.16407	0.737271	0.531273	1	5314	tags=40%, list=24%, signal=52%
REACTOME_OLFACTORY_SIGNALING_PATHWAY	REACTOME_OLFACTORY_SIGNALING_PATHWAY		103	-0.16405	-0.16405	0.00200803	0.530102	1	10530	tags=63%, list=47%, signal=118%
REACTOME_ANTIGEN_PROCESSING_UBIQUITINATION_PROTEASOME_DEGRADATION	REACTOME_ANTIGEN_PROCESSING_UBIQUITINATION_PROTEASOME_DEGRADATION		196	-0.162181	-0.162181	0	0.545272	1	11082	tags=65%, list=49%, signal=128%
ST_PHOSPHOINOSITIDE_3_KINASE_PATHWAY	ST_PHOSPHOINOSITIDE_3_KINASE_PATHWAY		36	-0.161994	-0.161994	0.268627	0.545573	1	17619	tags=94%, list=78%, signal=434%
REACTOME_NEF_MEDIATES_DOWN_MODULATION_OF_CELL_SURFACE_RECEPTORS_BY_RECRUITING_THEM_TO_CLATHRIN_ADAPTERS	REACTOME_NEF_MEDIATES_DOWN_MODULATION_OF_CELL_SURFACE_RECEPTORS_BY_RECRUITING_THEM_TO_CLATHRIN_ADAPTERS		20	-0.161857	-0.161857	0.604555	0.545328	1	18870	tags=100%, list=84%, signal=618%
BIOCARTA_TNFR1_PATHWAY	BIOCARTA_TNFR1_PATHWAY		29	-0.161788	-0.161788	0.402344	0.544696	1	18873	tags=100%, list=84%, signal=618%
REACTOME_TRANSCRIPTION_COUPLED_NER_TC_NER	REACTOME_TRANSCRIPTION_COUPLED_NER_TC_NER		44	-0.161783	-0.161783	0.174081	0.543373	1	14783	tags=82%, list=66%, signal=238%
REACTOME_HEPARAN_SULFATE_HEPARIN_HS_GAG_METABOLISM	REACTOME_HEPARAN_SULFATE_HEPARIN_HS_GAG_METABOLISM		47	-0.16162	-0.16162	0.119497	0.543421	1	5949	tags=43%, list=26%, signal=58%
PID_HNF3A_PATHWAY	PID_HNF3A_PATHWAY		38	-0.161324	-0.161324	0.227364	0.544751	1	3484	tags=32%, list=15%, signal=37%
PID_E2F_PATHWAY	PID_E2F_PATHWAY		74	-0.161316	-0.161316	0.0434783	0.543466	1	12199	tags=70%, list=54%, signal=153%
REACTOME_SIGNAL_AMPLIFICATION	REACTOME_SIGNAL_AMPLIFICATION		31	-0.161283	-0.161283	0.328063	0.542429	1	13802	tags=77%, list=61%, signal=200%
PID_EPHRINB_REV_PATHWAY	PID_EPHRINB_REV_PATHWAY		28	-0.160999	-0.160999	0.446429	0.543531	1	15675	tags=86%, list=70%, signal=282%
NABA_COLLAGENS	NABA_COLLAGENS		43	-0.160914	-0.160914	0.203629	0.543005	1	9996	tags=60%, list=44%, signal=109%
REACTOME_LIGAND_GATED_ION_CHANNEL_TRANSPORT	REACTOME_LIGAND_GATED_ION_CHANNEL_TRANSPORT		16	-0.160639	-0.160639	0.733333	0.544085	1	2015	tags=25%, list=9%, signal=27%
NABA_CORE_MATRISOME	NABA_CORE_MATRISOME		250	-0.160512	-0.160512	0	0.543787	1	3541	tags=32%, list=16%, signal=37%
REACTOME_LAGGING_STRAND_SYNTHESIS	REACTOME_LAGGING_STRAND_SYNTHESIS		19	-0.159652	-0.159652	0.6714	0.550015	1	12996	tags=74%, list=58%, signal=174%
REACTOME_HIV_LIFE_CYCLE	REACTOME_HIV_LIFE_CYCLE		114	-0.158634	-0.158634	0.00383142	0.557535	1	14811	tags=82%, list=66%, signal=237%
REACTOME_ION_CHANNEL_TRANSPORT	REACTOME_ION_CHANNEL_TRANSPORT		49	-0.158606	-0.158606	0.139313	0.556424	1	9301	tags=57%, list=41%, signal=97%
REACTOME_SIGNALING_BY_CONSTITUTIVELY_ACTIVE_EGFR	REACTOME_SIGNALING_BY_CONSTITUTIVELY_ACTIVE_EGFR		17	-0.158603	-0.158603	0.740664	0.555104	1	3054	tags=29%, list=14%, signal=34%
KEGG_GAP_JUNCTION	KEGG_GAP_JUNCTION		85	-0.158576	-0.158576	0.00976562	0.553972	1	3595	tags=32%, list=16%, signal=38%
PID_LIS1_PATHWAY	PID_LIS1_PATHWAY		28	-0.158359	-0.158359	0.464567	0.554459	1	10911	tags=64%, list=48%, signal=125%
KEGG_SELENOAMINO_ACID_METABOLISM	KEGG_SELENOAMINO_ACID_METABOLISM		26	-0.158215	-0.158215	0.456522	0.55444	1	12027	tags=69%, list=53%, signal=148%
NABA_SECRETED_FACTORS	NABA_SECRETED_FACTORS		276	-0.158106	-0.158106	0	0.554055	1	7251	tags=48%, list=32%, signal=70%
PID_REELIN_PATHWAY	PID_REELIN_PATHWAY		28	-0.157916	-0.157916	0.477695	0.554382	1	18156	tags=96%, list=81%, signal=498%
PID_SYNDECAN_1_PATHWAY	PID_SYNDECAN_1_PATHWAY		46	-0.157865	-0.157865	0.1643	0.553478	1	10156	tags=61%, list=45%, signal=111%
PID_ECADHERIN_NASCENT_AJ_PATHWAY	PID_ECADHERIN_NASCENT_AJ_PATHWAY		37	-0.157807	-0.157807	0.258621	0.552726	1	15922	tags=86%, list=71%, signal=295%
BIOCARTA_ACH_PATHWAY	BIOCARTA_ACH_PATHWAY		16	-0.157563	-0.157563	0.762808	0.553676	1	3491	tags=31%, list=16%, signal=37%
REACTOME_NUCLEAR_RECEPTOR_TRANSCRIPTION_PATHWAY	REACTOME_NUCLEAR_RECEPTOR_TRANSCRIPTION_PATHWAY		46	-0.156194	-0.156194	0.183594	0.564251	1	1875	tags=24%, list=8%, signal=26%
REACTOME_PROCESSIVE_SYNTHESIS_ON_THE_LAGGING_STRAND	REACTOME_PROCESSIVE_SYNTHESIS_ON_THE_LAGGING_STRAND		15	-0.156113	-0.156113	0.784585	0.563665	1	12996	tags=73%, list=58%, signal=173%
REACTOME_NUCLEAR_EVENTS_KINASE_AND_TRANSCRIPTION_FACTOR_ACTIVATION	REACTOME_NUCLEAR_EVENTS_KINASE_AND_TRANSCRIPTION_FACTOR_ACTIVATION		24	-0.156043	-0.156043	0.515873	0.562885	1	14312	tags=79%, list=64%, signal=217%
PID_ERBB4_PATHWAY	PID_ERBB4_PATHWAY		37	-0.156036	-0.156036	0.288201	0.561615	1	11095	tags=65%, list=49%, signal=128%
KEGG_INTESTINAL_IMMUNE_NETWORK_FOR_IGA_PRODUCTION	KEGG_INTESTINAL_IMMUNE_NETWORK_FOR_IGA_PRODUCTION		47	-0.15568	-0.15568	0.215768	0.563316	1	8477	tags=53%, list=38%, signal=85%
PID_SYNDECAN_2_PATHWAY	PID_SYNDECAN_2_PATHWAY		33	-0.155637	-0.155637	0.406883	0.562397	1	4688	tags=36%, list=21%, signal=46%
PID_PI3K_PLC_TRK_PATHWAY	PID_PI3K_PLC_TRK_PATHWAY		35	-0.155566	-0.155566	0.338552	0.561651	1	14512	tags=80%, list=64%, signal=225%
KEGG_AUTOIMMUNE_THYROID_DISEASE	KEGG_AUTOIMMUNE_THYROID_DISEASE		37	-0.15552	-0.15552	0.328512	0.56075	1	13540	tags=76%, list=60%, signal=190%
REACTOME_PROTEIN_FOLDING	REACTOME_PROTEIN_FOLDING		51	-0.154702	-0.154702	0.176353	0.566729	1	10650	tags=63%, list=47%, signal=119%
REACTOME_ANTIGEN_ACTIVATES_B_CELL_RECEPTOR_LEADING_TO_GENERATION_OF_SECOND_MESSENGERS	REACTOME_ANTIGEN_ACTIVATES_B_CELL_RECEPTOR_LEADING_TO_GENERATION_OF_SECOND_MESSENGERS		29	-0.154335	-0.154335	0.447368	0.568645	1	12055	tags=69%, list=54%, signal=148%
REACTOME_SIGNALING_BY_THE_B_CELL_RECEPTOR_BCR	REACTOME_SIGNALING_BY_THE_B_CELL_RECEPTOR_BCR		122	-0.154264	-0.154264	0.00580271	0.567912	1	14444	tags=80%, list=64%, signal=221%
PID_NOTCH_PATHWAY	PID_NOTCH_PATHWAY		58	-0.154149	-0.154149	0.120858	0.567597	1	4690	tags=36%, list=21%, signal=46%
BIOCARTA_IGF1MTOR_PATHWAY	BIOCARTA_IGF1MTOR_PATHWAY		20	-0.154124	-0.154124	0.712621	0.566484	1	16793	tags=90%, list=75%, signal=354%
BIOCARTA_FCER1_PATHWAY	BIOCARTA_FCER1_PATHWAY		38	-0.153943	-0.153943	0.29207	0.566885	1	14312	tags=79%, list=64%, signal=216%
BIOCARTA_EPO_PATHWAY	BIOCARTA_EPO_PATHWAY		19	-0.153813	-0.153813	0.658537	0.566851	1	14312	tags=79%, list=64%, signal=217%
PID_SMAD2_3NUCLEAR_PATHWAY	PID_SMAD2_3NUCLEAR_PATHWAY		77	-0.153807	-0.153807	0.0621242	0.56561	1	12044	tags=69%, list=54%, signal=148%
KEGG_GLYCINE_SERINE_AND_THREONINE_METABOLISM	KEGG_GLYCINE_SERINE_AND_THREONINE_METABOLISM		31	-0.153294	-0.153294	0.378378	0.568683	1	9625	tags=58%, list=43%, signal=101%
PID_DNA_PK_PATHWAY	PID_DNA_PK_PATHWAY		16	-0.153184	-0.153184	0.780287	0.568305	1	14844	tags=81%, list=66%, signal=238%
PID_ECADHERIN_KERATINOCYTE_PATHWAY	PID_ECADHERIN_KERATINOCYTE_PATHWAY		20	-0.153122	-0.153122	0.678431	0.567511	1	17941	tags=95%, list=80%, signal=468%
REACTOME_SIGNALLING_TO_RAS	REACTOME_SIGNALLING_TO_RAS		26	-0.15282	-0.15282	0.485265	0.568767	1	3491	tags=31%, list=16%, signal=36%
REACTOME_EXTRACELLULAR_MATRIX_ORGANIZATION	REACTOME_EXTRACELLULAR_MATRIX_ORGANIZATION		83	-0.151976	-0.151976	0.0466531	0.574754	1	3915	tags=33%, list=17%, signal=39%
KEGG_HOMOLOGOUS_RECOMBINATION	KEGG_HOMOLOGOUS_RECOMBINATION		28	-0.151806	-0.151806	0.538752	0.574833	1	13470	tags=75%, list=60%, signal=187%
REACTOME_TERMINATION_OF_O_GLYCAN_BIOSYNTHESIS	REACTOME_TERMINATION_OF_O_GLYCAN_BIOSYNTHESIS		21	-0.151408	-0.151408	0.633663	0.576873	1	5171	tags=38%, list=23%, signal=49%
REACTOME_HIV_INFECTION	REACTOME_HIV_INFECTION		193	-0.150338	-0.150338	0	0.585241	1	15423	tags=83%, list=69%, signal=263%
PID_FANCONI_PATHWAY	PID_FANCONI_PATHWAY		47	-0.15027	-0.15027	0.279678	0.584478	1	11472	tags=66%, list=51%, signal=134%
REACTOME_CYTOCHROME_P450_ARRANGED_BY_SUBSTRATE_TYPE	REACTOME_CYTOCHROME_P450_ARRANGED_BY_SUBSTRATE_TYPE		44	-0.149627	-0.149627	0.267894	0.588846	1	6871	tags=45%, list=31%, signal=65%
REACTOME_SEMAPHORIN_INTERACTIONS	REACTOME_SEMAPHORIN_INTERACTIONS		65	-0.14953	-0.14953	0.102913	0.588307	1	7380	tags=48%, list=33%, signal=71%
BIOCARTA_PPARA_PATHWAY	BIOCARTA_PPARA_PATHWAY		55	-0.149212	-0.149212	0.154472	0.589763	1	10156	tags=60%, list=45%, signal=109%
REACTOME_GENERATION_OF_SECOND_MESSENGER_MOLECULES	REACTOME_GENERATION_OF_SECOND_MESSENGER_MOLECULES		27	-0.148845	-0.148845	0.548387	0.591604	1	823	tags=19%, list=4%, signal=19%
REACTOME_CLASS_I_MHC_MEDIATED_ANTIGEN_PROCESSING_PRESENTATION	REACTOME_CLASS_I_MHC_MEDIATED_ANTIGEN_PROCESSING_PRESENTATION		233	-0.148733	-0.148733	0.0020284	0.591243	1	11082	tags=64%, list=49%, signal=125%
REACTOME_ENERGY_DEPENDENT_REGULATION_OF_MTOR_BY_LKB1_AMPK	REACTOME_ENERGY_DEPENDENT_REGULATION_OF_MTOR_BY_LKB1_AMPK		17	-0.148361	-0.148361	0.792844	0.593309	1	17849	tags=94%, list=79%, signal=454%
PID_AJDISS_2PATHWAY	PID_AJDISS_2PATHWAY		47	-0.148208	-0.148208	0.206564	0.593402	1	7687	tags=49%, list=34%, signal=74%
PID_AVB3_INTEGRIN_PATHWAY	PID_AVB3_INTEGRIN_PATHWAY		75	-0.14805	-0.14805	0.0532544	0.59354	1	5083	tags=37%, list=23%, signal=48%
PID_IL3_PATHWAY	PID_IL3_PATHWAY		27	-0.148044	-0.148044	0.511931	0.592276	1	10845	tags=63%, list=48%, signal=121%
REACTOME_NCAM1_INTERACTIONS	REACTOME_NCAM1_INTERACTIONS		37	-0.147822	-0.147822	0.337121	0.592959	1	3371	tags=30%, list=15%, signal=35%
PID_FGF_PATHWAY	PID_FGF_PATHWAY		53	-0.147502	-0.147502	0.173333	0.594534	1	18773	tags=98%, list=83%, signal=590%
PID_PS1_PATHWAY	PID_PS1_PATHWAY		46	-0.147266	-0.147266	0.244533	0.595444	1	16266	tags=87%, list=72%, signal=313%
PID_LYMPH_ANGIOGENESIS_PATHWAY	PID_LYMPH_ANGIOGENESIS_PATHWAY		25	-0.146582	-0.146582	0.609658	0.600196	1	11111	tags=64%, list=49%, signal=126%
REACTOME_PI3K_CASCADE	REACTOME_PI3K_CASCADE		63	-0.146243	-0.146243	0.122807	0.601951	1	17441	tags=92%, list=77%, signal=408%
PID_RB_1PATHWAY	PID_RB_1PATHWAY		63	-0.146008	-0.146008	0.146484	0.602762	1	9586	tags=57%, list=43%, signal=99%
BIOCARTA_ARAP_PATHWAY	BIOCARTA_ARAP_PATHWAY		17	-0.145252	-0.145252	0.825743	0.608003	1	19243	tags=100%, list=85%, signal=689%
REACTOME_GRB2_EVENTS_IN_ERBB2_SIGNALING	REACTOME_GRB2_EVENTS_IN_ERBB2_SIGNALING		21	-0.145049	-0.145049	0.722433	0.608503	1	5314	tags=38%, list=24%, signal=50%
KEGG_OLFACTORY_TRANSDUCTION	KEGG_OLFACTORY_TRANSDUCTION		143	-0.144799	-0.144799	0.0063425	0.609252	1	7466	tags=48%, list=33%, signal=71%
KEGG_VASOPRESSIN_REGULATED_WATER_REABSORPTION	KEGG_VASOPRESSIN_REGULATED_WATER_REABSORPTION		43	-0.144736	-0.144736	0.253438	0.608502	1	9836	tags=58%, list=44%, signal=103%
REACTOME_LATE_PHASE_OF_HIV_LIFE_CYCLE	REACTOME_LATE_PHASE_OF_HIV_LIFE_CYCLE		101	-0.14467	-0.14467	0.0250965	0.607755	1	14811	tags=80%, list=66%, signal=233%
KEGG_TIGHT_JUNCTION	KEGG_TIGHT_JUNCTION		121	-0.14452	-0.14452	0.0121212	0.60789	1	8113	tags=50%, list=36%, signal=78%
REACTOME_BILE_ACID_AND_BILE_SALT_METABOLISM	REACTOME_BILE_ACID_AND_BILE_SALT_METABOLISM		25	-0.144513	-0.144513	0.653277	0.606655	1	4855	tags=36%, list=22%, signal=46%
REACTOME_POST_NMDA_RECEPTOR_ACTIVATION_EVENTS	REACTOME_POST_NMDA_RECEPTOR_ACTIVATION_EVENTS		32	-0.144285	-0.144285	0.472393	0.60748	1	7309	tags=47%, list=32%, signal=69%
REACTOME_PROLONGED_ERK_ACTIVATION_EVENTS	REACTOME_PROLONGED_ERK_ACTIVATION_EVENTS		18	-0.144124	-0.144124	0.787575	0.607712	1	15517	tags=83%, list=69%, signal=268%
REACTOME_IL_RECEPTOR_SHC_SIGNALING	REACTOME_IL_RECEPTOR_SHC_SIGNALING		26	-0.144039	-0.144039	0.612403	0.607077	1	11480	tags=65%, list=51%, signal=133%
BIOCARTA_CASPASE_PATHWAY	BIOCARTA_CASPASE_PATHWAY		23	-0.143765	-0.143765	0.692308	0.60828	1	17320	tags=91%, list=77%, signal=396%
REACTOME_DESTABILIZATION_OF_MRNA_BY_KSRP	REACTOME_DESTABILIZATION_OF_MRNA_BY_KSRP		17	-0.143732	-0.143732	0.852	0.607259	1	15305	tags=82%, list=68%, signal=257%
REACTOME_AQUAPORIN_MEDIATED_TRANSPORT	REACTOME_AQUAPORIN_MEDIATED_TRANSPORT		48	-0.143691	-0.143691	0.253579	0.606299	1	8497	tags=52%, list=38%, signal=83%
REACTOME_INTRINSIC_PATHWAY_FOR_APOPTOSIS	REACTOME_INTRINSIC_PATHWAY_FOR_APOPTOSIS		29	-0.143456	-0.143456	0.529652	0.607119	1	5314	tags=38%, list=24%, signal=50%
REACTOME_NEUROTRANSMITTER_RELEASE_CYCLE	REACTOME_NEUROTRANSMITTER_RELEASE_CYCLE		27	-0.143404	-0.143404	0.587902	0.606297	1	9282	tags=56%, list=41%, signal=94%
KEGG_HUNTINGTONS_DISEASE	KEGG_HUNTINGTONS_DISEASE		167	-0.143177	-0.143177	0	0.607061	1	11898	tags=67%, list=53%, signal=141%
BIOCARTA_IGF1_PATHWAY	BIOCARTA_IGF1_PATHWAY		21	-0.142654	-0.142654	0.742633	0.610589	1	19302	tags=100%, list=86%, signal=701%
BIOCARTA_INSULIN_PATHWAY	BIOCARTA_INSULIN_PATHWAY		21	-0.142654	-0.142654	0.72541	0.609303	1	19302	tags=100%, list=86%, signal=701%
BIOCARTA_NGF_PATHWAY	BIOCARTA_NGF_PATHWAY		17	-0.142628	-0.142628	0.826087	0.608218	1	19302	tags=100%, list=86%, signal=701%
ST_DIFFERENTIATION_PATHWAY_IN_PC12_CELLS	ST_DIFFERENTIATION_PATHWAY_IN_PC12_CELLS		41	-0.14238	-0.14238	0.382979	0.609098	1	11625	tags=66%, list=52%, signal=136%
KEGG_BUTANOATE_METABOLISM	KEGG_BUTANOATE_METABOLISM		32	-0.141981	-0.141981	0.467368	0.611378	1	9471	tags=56%, list=42%, signal=97%
REACTOME_GOLGI_ASSOCIATED_VESICLE_BIOGENESIS	REACTOME_GOLGI_ASSOCIATED_VESICLE_BIOGENESIS		52	-0.141928	-0.141928	0.253411	0.610634	1	11964	tags=67%, list=53%, signal=143%
REACTOME_NCAM_SIGNALING_FOR_NEURITE_OUT_GROWTH	REACTOME_NCAM_SIGNALING_FOR_NEURITE_OUT_GROWTH		62	-0.14153	-0.14153	0.142292	0.612787	1	3722	tags=31%, list=17%, signal=37%
REACTOME_SEMA4D_IN_SEMAPHORIN_SIGNALING	REACTOME_SEMA4D_IN_SEMAPHORIN_SIGNALING		30	-0.141474	-0.141474	0.513026	0.611972	1	7325	tags=47%, list=33%, signal=69%
REACTOME_BIOLOGICAL_OXIDATIONS	REACTOME_BIOLOGICAL_OXIDATIONS		119	-0.140912	-0.140912	0.00591716	0.615705	1	6871	tags=45%, list=31%, signal=64%
PID_TRKR_PATHWAY	PID_TRKR_PATHWAY		59	-0.140824	-0.140824	0.184959	0.615208	1	18967	tags=98%, list=84%, signal=623%
KEGG_THYROID_CANCER	KEGG_THYROID_CANCER		29	-0.140638	-0.140638	0.554054	0.615553	1	3825	tags=31%, list=17%, signal=37%
BIOCARTA_TCR_PATHWAY	BIOCARTA_TCR_PATHWAY		45	-0.140518	-0.140518	0.32	0.615234	1	10850	tags=62%, list=48%, signal=120%
REACTOME_ARMS_MEDIATED_ACTIVATION	REACTOME_ARMS_MEDIATED_ACTIVATION		16	-0.140399	-0.140399	0.859213	0.615129	1	19352	tags=100%, list=86%, signal=712%
REACTOME_CREB_PHOSPHORYLATION_THROUGH_THE_ACTIVATION_OF_RAS	REACTOME_CREB_PHOSPHORYLATION_THROUGH_THE_ACTIVATION_OF_RAS		26	-0.139906	-0.139906	0.660156	0.618388	1	8110	tags=50%, list=36%, signal=78%
REACTOME_GAP_JUNCTION_TRAFFICKING	REACTOME_GAP_JUNCTION_TRAFFICKING		23	-0.13792	-0.13792	0.726	0.634413	1	1793	tags=22%, list=8%, signal=24%
REACTOME_INSULIN_RECEPTOR_SIGNALLING_CASCADE	REACTOME_INSULIN_RECEPTOR_SIGNALLING_CASCADE		79	-0.137072	-0.137072	0.0831722	0.640324	1	17441	tags=91%, list=77%, signal=403%
REACTOME_LOSS_OF_NLP_FROM_MITOTIC_CENTROSOMES	REACTOME_LOSS_OF_NLP_FROM_MITOTIC_CENTROSOMES		56	-0.137059	-0.137059	0.240404	0.639138	1	16619	tags=88%, list=74%, signal=334%
REACTOME_RAP1_SIGNALLING	REACTOME_RAP1_SIGNALLING		16	-0.136954	-0.136954	0.871094	0.638833	1	8175	tags=50%, list=36%, signal=78%
REACTOME_CD28_DEPENDENT_PI3K_AKT_SIGNALING	REACTOME_CD28_DEPENDENT_PI3K_AKT_SIGNALING		21	-0.136917	-0.136917	0.79089	0.637858	1	19431	tags=100%, list=86%, signal=731%
REACTOME_APOPTOSIS	REACTOME_APOPTOSIS		140	-0.136576	-0.136576	0.0059761	0.639725	1	11416	tags=64%, list=51%, signal=130%
KEGG_ONE_CARBON_POOL_BY_FOLATE	KEGG_ONE_CARBON_POOL_BY_FOLATE		17	-0.13636	-0.13636	0.882353	0.640442	1	19443	tags=100%, list=86%, signal=734%
PID_P75_NTR_PATHWAY	PID_P75_NTR_PATHWAY		66	-0.136301	-0.136301	0.154739	0.639749	1	11948	tags=67%, list=53%, signal=142%
REACTOME_AMINE_COMPOUND_SLC_TRANSPORTERS	REACTOME_AMINE_COMPOUND_SLC_TRANSPORTERS		22	-0.136115	-0.136115	0.756757	0.640015	1	3079	tags=27%, list=14%, signal=32%
KEGG_VIRAL_MYOCARDITIS	KEGG_VIRAL_MYOCARDITIS		66	-0.136013	-0.136013	0.216495	0.639677	1	8544	tags=52%, list=38%, signal=83%
BIOCARTA_IL3_PATHWAY	BIOCARTA_IL3_PATHWAY		15	-0.13593	-0.13593	0.897331	0.639118	1	5947	tags=40%, list=26%, signal=54%
PID_HES_HEY_PATHWAY	PID_HES_HEY_PATHWAY		44	-0.135904	-0.135904	0.355932	0.638055	1	5133	tags=36%, list=23%, signal=47%
REACTOME_PKB_MEDIATED_EVENTS	REACTOME_PKB_MEDIATED_EVENTS		28	-0.135813	-0.135813	0.655914	0.637578	1	17849	tags=93%, list=79%, signal=448%
PID_NETRIN_PATHWAY	PID_NETRIN_PATHWAY		32	-0.135609	-0.135609	0.562368	0.638101	1	7504	tags=47%, list=33%, signal=70%
REACTOME_MITOTIC_G2_G2_M_PHASES	REACTOME_MITOTIC_G2_G2_M_PHASES		78	-0.135592	-0.135592	0.130879	0.636948	1	6194	tags=41%, list=28%, signal=56%
REACTOME_TCR_SIGNALING	REACTOME_TCR_SIGNALING		53	-0.134972	-0.134972	0.286	0.640945	1	13958	tags=75%, list=62%, signal=198%
REACTOME_ADHERENS_JUNCTIONS_INTERACTIONS	REACTOME_ADHERENS_JUNCTIONS_INTERACTIONS		26	-0.134948	-0.134948	0.663327	0.639894	1	6490	tags=42%, list=29%, signal=59%
BIOCARTA_ALK_PATHWAY	BIOCARTA_ALK_PATHWAY		35	-0.134753	-0.134753	0.43595	0.640364	1	16266	tags=86%, list=72%, signal=309%
REACTOME_DNA_REPAIR	REACTOME_DNA_REPAIR		105	-0.134712	-0.134712	0.049904	0.639443	1	14347	tags=77%, list=64%, signal=212%
REACTOME_PLATELET_CALCIUM_HOMEOSTASIS	REACTOME_PLATELET_CALCIUM_HOMEOSTASIS		16	-0.134684	-0.134684	0.900192	0.63845	1	1192	tags=19%, list=5%, signal=20%
BIOCARTA_TOB1_PATHWAY	BIOCARTA_TOB1_PATHWAY		18	-0.133965	-0.133965	0.82438	0.643693	1	1990	tags=22%, list=9%, signal=24%
BIOCARTA_RACCYCD_PATHWAY	BIOCARTA_RACCYCD_PATHWAY		26	-0.133554	-0.133554	0.67418	0.646199	1	10850	tags=62%, list=48%, signal=119%
REACTOME_PI_3K_CASCADE	REACTOME_PI_3K_CASCADE		50	-0.133172	-0.133172	0.268908	0.648174	1	16818	tags=88%, list=75%, signal=347%
REACTOME_NUCLEAR_SIGNALING_BY_ERBB4	REACTOME_NUCLEAR_SIGNALING_BY_ERBB4		35	-0.133154	-0.133154	0.508032	0.647068	1	11157	tags=63%, list=50%, signal=124%
REACTOME_PHASE_II_CONJUGATION	REACTOME_PHASE_II_CONJUGATION		60	-0.133151	-0.133151	0.25641	0.645829	1	2264	tags=23%, list=10%, signal=26%
PID_TGFBR_PATHWAY	PID_TGFBR_PATHWAY		54	-0.133044	-0.133044	0.23506	0.645525	1	13270	tags=72%, list=59%, signal=176%
REACTOME_FACTORS_INVOLVED_IN_MEGAKARYOCYTE_DEVELOPMENT_AND_PLATELET_PRODUCTION	REACTOME_FACTORS_INVOLVED_IN_MEGAKARYOCYTE_DEVELOPMENT_AND_PLATELET_PRODUCTION		111	-0.132501	-0.132501	0.0294695	0.649093	1	7578	tags=47%, list=34%, signal=70%
PID_NFAT_3PATHWAY	PID_NFAT_3PATHWAY		54	-0.132406	-0.132406	0.272921	0.648659	1	16619	tags=87%, list=74%, signal=332%
REACTOME_SIGNALING_BY_SCF_KIT	REACTOME_SIGNALING_BY_SCF_KIT		75	-0.132119	-0.132119	0.144016	0.649849	1	14444	tags=77%, list=64%, signal=215%
REACTOME_GLYCOSAMINOGLYCAN_METABOLISM	REACTOME_GLYCOSAMINOGLYCAN_METABOLISM		103	-0.13204	-0.13204	0.0393701	0.649236	1	6658	tags=43%, list=30%, signal=60%
REACTOME_ERK_MAPK_TARGETS	REACTOME_ERK_MAPK_TARGETS		21	-0.131759	-0.131759	0.816794	0.6504	1	12044	tags=67%, list=54%, signal=143%
KEGG_BASAL_CELL_CARCINOMA	KEGG_BASAL_CELL_CARCINOMA		52	-0.131723	-0.131723	0.297297	0.649425	1	3103	tags=27%, list=14%, signal=31%
BIOCARTA_AKT_PATHWAY	BIOCARTA_AKT_PATHWAY		22	-0.131201	-0.131201	0.803536	0.652565	1	14444	tags=77%, list=64%, signal=215%
REACTOME_DIABETES_PATHWAYS	REACTOME_DIABETES_PATHWAYS		124	-0.1308	-0.1308	0.031068	0.65465	1	4334	tags=32%, list=19%, signal=40%
PID_EPHA2_FWD_PATHWAY	PID_EPHA2_FWD_PATHWAY		19	-0.130662	-0.130662	0.878669	0.654585	1	13648	tags=74%, list=61%, signal=187%
KEGG_ALDOSTERONE_REGULATED_SODIUM_REABSORPTION	KEGG_ALDOSTERONE_REGULATED_SODIUM_REABSORPTION		40	-0.129931	-0.129931	0.451866	0.659704	1	4397	tags=33%, list=20%, signal=40%
REACTOME_CLASS_B_2_SECRETIN_FAMILY_RECEPTORS	REACTOME_CLASS_B_2_SECRETIN_FAMILY_RECEPTORS		76	-0.129862	-0.129862	0.138614	0.65905	1	9527	tags=55%, list=42%, signal=95%
PID_GMCSF_PATHWAY	PID_GMCSF_PATHWAY		37	-0.128716	-0.128716	0.543967	0.667734	1	3192	tags=27%, list=14%, signal=31%
KEGG_GRAFT_VERSUS_HOST_DISEASE	KEGG_GRAFT_VERSUS_HOST_DISEASE		37	-0.128448	-0.128448	0.507722	0.668811	1	13540	tags=73%, list=60%, signal=183%
KEGG_PROPANOATE_METABOLISM	KEGG_PROPANOATE_METABOLISM		32	-0.12844	-0.12844	0.587045	0.667623	1	12589	tags=69%, list=56%, signal=156%
KEGG_ALZHEIMERS_DISEASE	KEGG_ALZHEIMERS_DISEASE		151	-0.128394	-0.128394	0.0140281	0.666781	1	12037	tags=66%, list=53%, signal=141%
KEGG_CYTOKINE_CYTOKINE_RECEPTOR_INTERACTION	KEGG_CYTOKINE_CYTOKINE_RECEPTOR_INTERACTION		230	-0.128113	-0.128113	0	0.668034	1	3508	tags=28%, list=16%, signal=33%
KEGG_TGF_BETA_SIGNALING_PATHWAY	KEGG_TGF_BETA_SIGNALING_PATHWAY		82	-0.127971	-0.127971	0.122407	0.66809	1	15797	tags=83%, list=70%, signal=277%
PID_ERBB1_INTERNALIZATION_PATHWAY	PID_ERBB1_INTERNALIZATION_PATHWAY		41	-0.127426	-0.127426	0.448898	0.671625	1	11412	tags=63%, list=51%, signal=128%
PID_CDC42_REG_PATHWAY	PID_CDC42_REG_PATHWAY		30	-0.127234	-0.127234	0.668763	0.671966	1	9896	tags=57%, list=44%, signal=101%
REACTOME_CHONDROITIN_SULFATE_DERMATAN_SULFATE_METABOLISM	REACTOME_CHONDROITIN_SULFATE_DERMATAN_SULFATE_METABOLISM		45	-0.127066	-0.127066	0.437247	0.672205	1	5650	tags=38%, list=25%, signal=50%
NABA_ECM_REGULATORS	NABA_ECM_REGULATORS		206	-0.126905	-0.126905	0	0.672212	1	4273	tags=32%, list=19%, signal=39%
BIOCARTA_IL2RB_PATHWAY	BIOCARTA_IL2RB_PATHWAY		38	-0.126558	-0.126558	0.552684	0.674016	1	12558	tags=68%, list=56%, signal=155%
KEGG_SMALL_CELL_LUNG_CANCER	KEGG_SMALL_CELL_LUNG_CANCER		84	-0.125937	-0.125937	0.10495	0.67816	1	11111	tags=62%, list=49%, signal=122%
REACTOME_YAP1_AND_WWTR1_TAZ_STIMULATED_GENE_EXPRESSION	REACTOME_YAP1_AND_WWTR1_TAZ_STIMULATED_GENE_EXPRESSION		23	-0.125734	-0.125734	0.826172	0.678669	1	2067	tags=22%, list=9%, signal=24%
KEGG_FOCAL_ADHESION	KEGG_FOCAL_ADHESION		197	-0.125635	-0.125635	0.0021322	0.678257	1	5653	tags=38%, list=25%, signal=50%
REACTOME_STRIATED_MUSCLE_CONTRACTION	REACTOME_STRIATED_MUSCLE_CONTRACTION		24	-0.125545	-0.125545	0.815951	0.677763	1	13122	tags=71%, list=58%, signal=170%
PID_AMB2_NEUTROPHILS_PATHWAY	PID_AMB2_NEUTROPHILS_PATHWAY		39	-0.125439	-0.125439	0.556911	0.677336	1	6994	tags=44%, list=31%, signal=63%
PID_VEGFR1_PATHWAY	PID_VEGFR1_PATHWAY		26	-0.125286	-0.125286	0.791016	0.677439	1	17096	tags=88%, list=76%, signal=367%
PID_TELOMERASE_PATHWAY	PID_TELOMERASE_PATHWAY		66	-0.124441	-0.124441	0.25	0.683534	1	10850	tags=61%, list=48%, signal=117%
PID_ERA_GENOMIC_PATHWAY	PID_ERA_GENOMIC_PATHWAY		62	-0.124188	-0.124188	0.297952	0.68442	1	9557	tags=55%, list=42%, signal=95%
REACTOME_RESPONSE_TO_ELEVATED_PLATELET_CYTOSOLIC_CA2_	REACTOME_RESPONSE_TO_ELEVATED_PLATELET_CYTOSOLIC_CA2_		78	-0.123858	-0.123858	0.166994	0.686093	1	11363	tags=63%, list=50%, signal=126%
PID_WNT_NONCANONICAL_PATHWAY	PID_WNT_NONCANONICAL_PATHWAY		32	-0.123788	-0.123788	0.631263	0.685389	1	16914	tags=88%, list=75%, signal=352%
REACTOME_O_LINKED_GLYCOSYLATION_OF_MUCINS	REACTOME_O_LINKED_GLYCOSYLATION_OF_MUCINS		53	-0.123756	-0.123756	0.37428	0.684421	1	6990	tags=43%, list=31%, signal=63%
PID_P38_ALPHA_BETA_DOWNSTREAM_PATHWAY	PID_P38_ALPHA_BETA_DOWNSTREAM_PATHWAY		37	-0.12348	-0.12348	0.544555	0.685608	1	14260	tags=76%, list=63%, signal=206%
PID_INTEGRIN2_PATHWAY	PID_INTEGRIN2_PATHWAY		27	-0.123343	-0.123343	0.740664	0.685539	1	9733	tags=56%, list=43%, signal=98%
REACTOME_REGULATION_OF_INSULIN_SECRETION	REACTOME_REGULATION_OF_INSULIN_SECRETION		81	-0.123288	-0.123288	0.15	0.68476	1	9463	tags=54%, list=42%, signal=93%
KEGG_AXON_GUIDANCE	KEGG_AXON_GUIDANCE		128	-0.123093	-0.123093	0.0342857	0.685357	1	12721	tags=69%, list=57%, signal=157%
KEGG_CELL_ADHESION_MOLECULES_CAMS	KEGG_CELL_ADHESION_MOLECULES_CAMS		127	-0.121607	-0.121607	0.0479042	0.696483	1	6141	tags=39%, list=27%, signal=54%
PID_MYC_REPRESS_PATHWAY	PID_MYC_REPRESS_PATHWAY		62	-0.121575	-0.121575	0.324803	0.695513	1	12157	tags=66%, list=54%, signal=143%
BIOCARTA_BAD_PATHWAY	BIOCARTA_BAD_PATHWAY		26	-0.121538	-0.121538	0.762097	0.694504	1	18046	tags=92%, list=80%, signal=465%
REACTOME_PHOSPHOLIPASE_C_MEDIATED_CASCADE	REACTOME_PHOSPHOLIPASE_C_MEDIATED_CASCADE		49	-0.121464	-0.121464	0.422925	0.693963	1	7379	tags=45%, list=33%, signal=67%
KEGG_T_CELL_RECEPTOR_SIGNALING_PATHWAY	KEGG_T_CELL_RECEPTOR_SIGNALING_PATHWAY		105	-0.120814	-0.120814	0.0710059	0.698128	1	14444	tags=76%, list=64%, signal=212%
PID_HDAC_CLASSIII_PATHWAY	PID_HDAC_CLASSIII_PATHWAY		24	-0.120091	-0.120091	0.846154	0.703181	1	17934	tags=92%, list=80%, signal=451%
KEGG_RENAL_CELL_CARCINOMA	KEGG_RENAL_CELL_CARCINOMA		70	-0.119538	-0.119538	0.257198	0.706542	1	15969	tags=83%, list=71%, signal=284%
REACTOME_APOPTOTIC_EXECUTION_PHASE	REACTOME_APOPTOTIC_EXECUTION_PHASE		49	-0.119342	-0.119342	0.439604	0.706866	1	16614	tags=86%, list=74%, signal=327%
REACTOME_G_ALPHA_Z_SIGNALLING_EVENTS	REACTOME_G_ALPHA_Z_SIGNALLING_EVENTS		44	-0.119046	-0.119046	0.547667	0.708149	1	7558	tags=45%, list=34%, signal=68%
PID_TAP63_PATHWAY	PID_TAP63_PATHWAY		54	-0.118875	-0.118875	0.393195	0.708346	1	9003	tags=52%, list=40%, signal=86%
REACTOME_MYOGENESIS	REACTOME_MYOGENESIS		26	-0.118849	-0.118849	0.813387	0.707318	1	16375	tags=85%, list=73%, signal=310%
REACTOME_IL_2_SIGNALING	REACTOME_IL_2_SIGNALING		40	-0.118448	-0.118448	0.571429	0.709374	1	10845	tags=60%, list=48%, signal=116%
BIOCARTA_CARDIACEGF_PATHWAY	BIOCARTA_CARDIACEGF_PATHWAY		17	-0.117812	-0.117812	0.943689	0.713378	1	15888	tags=82%, list=71%, signal=280%
KEGG_PROSTATE_CANCER	KEGG_PROSTATE_CANCER		87	-0.117694	-0.117694	0.168959	0.713112	1	3054	tags=25%, list=14%, signal=29%
REACTOME_OPIOID_SIGNALLING	REACTOME_OPIOID_SIGNALLING		76	-0.117678	-0.117678	0.248555	0.71201	1	10985	tags=61%, list=49%, signal=118%
REACTOME_COLLAGEN_FORMATION	REACTOME_COLLAGEN_FORMATION		57	-0.117657	-0.117657	0.369168	0.710977	1	9996	tags=56%, list=44%, signal=101%
KEGG_PROGESTERONE_MEDIATED_OOCYTE_MATURATION	KEGG_PROGESTERONE_MEDIATED_OOCYTE_MATURATION		82	-0.117492	-0.117492	0.16699	0.711111	1	15483	tags=80%, list=69%, signal=257%
PID_P53_REGULATION_PATHWAY	PID_P53_REGULATION_PATHWAY		59	-0.117324	-0.117324	0.367983	0.711345	1	16061	tags=83%, list=71%, signal=289%
REACTOME_AXON_GUIDANCE	REACTOME_AXON_GUIDANCE		236	-0.117222	-0.117222	0.00209644	0.710976	1	9503	tags=54%, list=42%, signal=92%
KEGG_DILATED_CARDIOMYOPATHY	KEGG_DILATED_CARDIOMYOPATHY		85	-0.117181	-0.117181	0.184557	0.710081	1	7701	tags=46%, list=34%, signal=69%
REACTOME_INTEGRIN_ALPHAIIB_BETA3_SIGNALING	REACTOME_INTEGRIN_ALPHAIIB_BETA3_SIGNALING		25	-0.116986	-0.116986	0.826176	0.710455	1	8175	tags=48%, list=36%, signal=75%
REACTOME_CELL_CELL_JUNCTION_ORGANIZATION	REACTOME_CELL_CELL_JUNCTION_ORGANIZATION		51	-0.116916	-0.116916	0.449597	0.709799	1	5761	tags=37%, list=26%, signal=50%
SIG_CHEMOTAXIS	SIG_CHEMOTAXIS		44	-0.11666	-0.11666	0.557034	0.71067	1	10681	tags=59%, list=47%, signal=112%
KEGG_ACUTE_MYELOID_LEUKEMIA	KEGG_ACUTE_MYELOID_LEUKEMIA		57	-0.116628	-0.116628	0.370874	0.709675	1	2911	tags=25%, list=13%, signal=28%
REACTOME_SIGNALING_BY_INSULIN_RECEPTOR	REACTOME_SIGNALING_BY_INSULIN_RECEPTOR		99	-0.114592	-0.114592	0.156489	0.725404	1	17441	tags=89%, list=77%, signal=393%
REACTOME_INWARDLY_RECTIFYING_K_CHANNELS	REACTOME_INWARDLY_RECTIFYING_K_CHANNELS		27	-0.114403	-0.114403	0.863548	0.725612	1	2431	tags=22%, list=11%, signal=25%
KEGG_AMYOTROPHIC_LATERAL_SCLEROSIS_ALS	KEGG_AMYOTROPHIC_LATERAL_SCLEROSIS_ALS		51	-0.113679	-0.113679	0.46169	0.730454	1	4951	tags=33%, list=22%, signal=43%
KEGG_HEDGEHOG_SIGNALING_PATHWAY	KEGG_HEDGEHOG_SIGNALING_PATHWAY		54	-0.113457	-0.113457	0.469349	0.731003	1	5790	tags=37%, list=26%, signal=50%
REACTOME_G_PROTEIN_BETA_GAMMA_SIGNALLING	REACTOME_G_PROTEIN_BETA_GAMMA_SIGNALLING		28	-0.113364	-0.113364	0.842742	0.730543	1	15942	tags=82%, list=71%, signal=281%
REACTOME_TRANS_GOLGI_NETWORK_VESICLE_BUDDING	REACTOME_TRANS_GOLGI_NETWORK_VESICLE_BUDDING		59	-0.112887	-0.112887	0.396484	0.733365	1	11964	tags=64%, list=53%, signal=137%
REACTOME_AMINO_ACID_TRANSPORT_ACROSS_THE_PLASMA_MEMBRANE	REACTOME_AMINO_ACID_TRANSPORT_ACROSS_THE_PLASMA_MEMBRANE		30	-0.112883	-0.112883	0.832669	0.732132	1	1215	tags=17%, list=5%, signal=18%
KEGG_PENTOSE_PHOSPHATE_PATHWAY	KEGG_PENTOSE_PHOSPHATE_PATHWAY		27	-0.112401	-0.112401	0.855042	0.734704	1	17482	tags=89%, list=78%, signal=398%
REACTOME_PLATELET_HOMEOSTASIS	REACTOME_PLATELET_HOMEOSTASIS		75	-0.111524	-0.111524	0.272189	0.740592	1	9804	tags=55%, list=44%, signal=97%
KEGG_PATHOGENIC_ESCHERICHIA_COLI_INFECTION	KEGG_PATHOGENIC_ESCHERICHIA_COLI_INFECTION		55	-0.111268	-0.111268	0.463602	0.741421	1	12645	tags=67%, list=56%, signal=153%
BIOCARTA_EDG1_PATHWAY	BIOCARTA_EDG1_PATHWAY		27	-0.111245	-0.111245	0.864542	0.740356	1	7504	tags=44%, list=33%, signal=67%
REACTOME_GLUCAGON_SIGNALING_IN_METABOLIC_REGULATION	REACTOME_GLUCAGON_SIGNALING_IN_METABOLIC_REGULATION		32	-0.111043	-0.111043	0.779352	0.740692	1	9463	tags=53%, list=42%, signal=92%
PID_P38_ALPHA_BETA_PATHWAY	PID_P38_ALPHA_BETA_PATHWAY		31	-0.111041	-0.111041	0.741053	0.739452	1	4766	tags=32%, list=21%, signal=41%
PID_MTOR_4PATHWAY	PID_MTOR_4PATHWAY		69	-0.110757	-0.110757	0.355828	0.740462	1	8607	tags=49%, list=38%, signal=80%
KEGG_O_GLYCAN_BIOSYNTHESIS	KEGG_O_GLYCAN_BIOSYNTHESIS		28	-0.110377	-0.110377	0.861284	0.742322	1	9578	tags=54%, list=43%, signal=93%
REACTOME_RECYCLING_PATHWAY_OF_L1	REACTOME_RECYCLING_PATHWAY_OF_L1		27	-0.109569	-0.109569	0.859794	0.74732	1	11710	tags=63%, list=52%, signal=131%
KEGG_BLADDER_CANCER	KEGG_BLADDER_CANCER		42	-0.109017	-0.109017	0.674419	0.750349	1	2911	tags=24%, list=13%, signal=27%
PID_RET_PATHWAY	PID_RET_PATHWAY		39	-0.108168	-0.108168	0.732106	0.755704	1	10845	tags=59%, list=48%, signal=114%
REACTOME_PLATELET_AGGREGATION_PLUG_FORMATION	REACTOME_PLATELET_AGGREGATION_PLUG_FORMATION		34	-0.107607	-0.107607	0.803245	0.758959	1	8175	tags=47%, list=36%, signal=74%
KEGG_VIBRIO_CHOLERAE_INFECTION	KEGG_VIBRIO_CHOLERAE_INFECTION		52	-0.107041	-0.107041	0.559574	0.762276	1	11016	tags=60%, list=49%, signal=116%
KEGG_HYPERTROPHIC_CARDIOMYOPATHY_HCM	KEGG_HYPERTROPHIC_CARDIOMYOPATHY_HCM		78	-0.107003	-0.107003	0.319277	0.761318	1	7701	tags=45%, list=34%, signal=68%
REACTOME_RECRUITMENT_OF_MITOTIC_CENTROSOME_PROTEINS_AND_COMPLEXES	REACTOME_RECRUITMENT_OF_MITOTIC_CENTROSOME_PROTEINS_AND_COMPLEXES		63	-0.106115	-0.106115	0.471193	0.767249	1	6194	tags=38%, list=28%, signal=52%
ST_INTEGRIN_SIGNALING_PATHWAY	ST_INTEGRIN_SIGNALING_PATHWAY		82	-0.106078	-0.106078	0.270563	0.766231	1	7504	tags=44%, list=33%, signal=66%
PID_CD8_TCR_PATHWAY	PID_CD8_TCR_PATHWAY		53	-0.105763	-0.105763	0.531513	0.767538	1	15888	tags=81%, list=71%, signal=275%
REACTOME_METABOLISM_OF_AMINO_ACIDS_AND_DERIVATIVES	REACTOME_METABOLISM_OF_AMINO_ACIDS_AND_DERIVATIVES		189	-0.105696	-0.105696	0.0204918	0.766785	1	9075	tags=51%, list=40%, signal=84%
REACTOME_SIGNALLING_TO_ERKS	REACTOME_SIGNALLING_TO_ERKS		34	-0.104952	-0.104952	0.838384	0.77109	1	15517	tags=79%, list=69%, signal=255%
REACTOME_POST_TRANSLATIONAL_PROTEIN_MODIFICATION	REACTOME_POST_TRANSLATIONAL_PROTEIN_MODIFICATION		177	-0.104824	-0.104824	0.0273973	0.77079	1	9614	tags=53%, list=43%, signal=92%
PID_PI3KCI_AKT_PATHWAY	PID_PI3KCI_AKT_PATHWAY		35	-0.104723	-0.104723	0.819253	0.770287	1	17584	tags=89%, list=78%, signal=404%
PID_EPO_PATHWAY	PID_EPO_PATHWAY		34	-0.104104	-0.104104	0.831703	0.773706	1	14212	tags=74%, list=63%, signal=199%
KEGG_JAK_STAT_SIGNALING_PATHWAY	KEGG_JAK_STAT_SIGNALING_PATHWAY		124	-0.102827	-0.102827	0.182195	0.782243	1	3508	tags=26%, list=16%, signal=30%
REACTOME_TRIGLYCERIDE_BIOSYNTHESIS	REACTOME_TRIGLYCERIDE_BIOSYNTHESIS		38	-0.101976	-0.101976	0.762712	0.787511	1	8964	tags=50%, list=40%, signal=83%
KEGG_REGULATION_OF_ACTIN_CYTOSKELETON	KEGG_REGULATION_OF_ACTIN_CYTOSKELETON		198	-0.101907	-0.101907	0.0281125	0.786768	1	7504	tags=43%, list=33%, signal=65%
PID_TCPTP_PATHWAY	PID_TCPTP_PATHWAY		42	-0.101848	-0.101848	0.755467	0.785891	1	11111	tags=60%, list=49%, signal=117%
REACTOME_PLC_BETA_MEDIATED_EVENTS	REACTOME_PLC_BETA_MEDIATED_EVENTS		42	-0.10098	-0.10098	0.728195	0.791054	1	7379	tags=43%, list=33%, signal=64%
PID_ERBB1_DOWNSTREAM_PATHWAY	PID_ERBB1_DOWNSTREAM_PATHWAY		104	-0.100047	-0.100047	0.230303	0.796689	1	12044	tags=63%, list=54%, signal=136%
BIOCARTA_BCR_PATHWAY	BIOCARTA_BCR_PATHWAY		34	-0.0996545	-0.0996545	0.857143	0.798288	1	14312	tags=74%, list=64%, signal=202%
PID_AR_NONGENOMIC_PATHWAY	PID_AR_NONGENOMIC_PATHWAY		31	-0.0983815	-0.0983815	0.917184	0.806687	1	15942	tags=81%, list=71%, signal=276%
PID_ENDOTHELIN_PATHWAY	PID_ENDOTHELIN_PATHWAY		62	-0.0981984	-0.0981984	0.54049	0.80671	1	7236	tags=42%, list=32%, signal=62%
PID_ILK_PATHWAY	PID_ILK_PATHWAY		44	-0.0980404	-0.0980404	0.766807	0.806631	1	12634	tags=66%, list=56%, signal=150%
PID_S1P_META_PATHWAY	PID_S1P_META_PATHWAY		21	-0.0980142	-0.0980142	0.977551	0.8055	1	11731	tags=62%, list=52%, signal=129%
REACTOME_PEPTIDE_LIGAND_BINDING_RECEPTORS	REACTOME_PEPTIDE_LIGAND_BINDING_RECEPTORS		156	-0.0968335	-0.0968335	0.10687	0.812733	1	2598	tags=21%, list=12%, signal=24%
REACTOME_CLASS_A1_RHODOPSIN_LIKE_RECEPTORS	REACTOME_CLASS_A1_RHODOPSIN_LIKE_RECEPTORS		251	-0.0956361	-0.0956361	0.0207469	0.819934	1	3522	tags=25%, list=16%, signal=29%
KEGG_TASTE_TRANSDUCTION	KEGG_TASTE_TRANSDUCTION		47	-0.0955193	-0.0955193	0.745902	0.819414	1	5997	tags=36%, list=27%, signal=49%
REACTOME_POTASSIUM_CHANNELS	REACTOME_POTASSIUM_CHANNELS		86	-0.0952853	-0.0952853	0.381238	0.819907	1	4146	tags=28%, list=18%, signal=34%
REACTOME_FANCONI_ANEMIA_PATHWAY	REACTOME_FANCONI_ANEMIA_PATHWAY		21	-0.0952699	-0.0952699	0.973896	0.818696	1	9649	tags=52%, list=43%, signal=92%
BIOCARTA_VEGF_PATHWAY	BIOCARTA_VEGF_PATHWAY		29	-0.094846	-0.094846	0.931677	0.820495	1	16497	tags=83%, list=73%, signal=309%
REACTOME_G_ALPHA_I_SIGNALLING_EVENTS	REACTOME_G_ALPHA_I_SIGNALLING_EVENTS		171	-0.0940785	-0.0940785	0.0893971	0.824791	1	3428	tags=25%, list=15%, signal=29%
KEGG_ARGININE_AND_PROLINE_METABOLISM	KEGG_ARGININE_AND_PROLINE_METABOLISM		54	-0.0934239	-0.0934239	0.694611	0.827994	1	3322	tags=24%, list=15%, signal=28%
KEGG_COLORECTAL_CANCER	KEGG_COLORECTAL_CANCER		62	-0.0930227	-0.0930227	0.667976	0.8295	1	13524	tags=69%, list=60%, signal=173%
KEGG_MELANOMA	KEGG_MELANOMA		65	-0.0921178	-0.0921178	0.608519	0.834657	1	16287	tags=82%, list=72%, signal=294%
BIOCARTA_MCALPAIN_PATHWAY	BIOCARTA_MCALPAIN_PATHWAY		24	-0.0918223	-0.0918223	0.984526	0.83534	1	8253	tags=46%, list=37%, signal=72%
REACTOME_UNFOLDED_PROTEIN_RESPONSE	REACTOME_UNFOLDED_PROTEIN_RESPONSE		77	-0.0914626	-0.0914626	0.491018	0.836362	1	8473	tags=47%, list=38%, signal=75%
PID_LYSOPHOSPHOLIPID_PATHWAY	PID_LYSOPHOSPHOLIPID_PATHWAY		65	-0.0913686	-0.0913686	0.614625	0.835731	1	3491	tags=25%, list=16%, signal=29%
SIG_INSULIN_RECEPTOR_PATHWAY_IN_CARDIAC_MYOCYTES	SIG_INSULIN_RECEPTOR_PATHWAY_IN_CARDIAC_MYOCYTES		50	-0.0910842	-0.0910842	0.754098	0.836303	1	14612	tags=74%, list=65%, signal=210%
KEGG_CYTOSOLIC_DNA_SENSING_PATHWAY	KEGG_CYTOSOLIC_DNA_SENSING_PATHWAY		42	-0.0901036	-0.0901036	0.862705	0.841663	1	2800	tags=21%, list=12%, signal=24%
REACTOME_INTEGRATION_OF_ENERGY_METABOLISM	REACTOME_INTEGRATION_OF_ENERGY_METABOLISM		108	-0.0898509	-0.0898509	0.326446	0.842138	1	9868	tags=53%, list=44%, signal=94%
KEGG_LONG_TERM_DEPRESSION	KEGG_LONG_TERM_DEPRESSION		64	-0.0897235	-0.0897235	0.656746	0.841684	1	2911	tags=22%, list=13%, signal=25%
PID_LKB1_PATHWAY	PID_LKB1_PATHWAY		47	-0.0886575	-0.0886575	0.785276	0.84751	1	18124	tags=89%, list=81%, signal=458%
KEGG_PYRIMIDINE_METABOLISM	KEGG_PYRIMIDINE_METABOLISM		97	-0.0884734	-0.0884734	0.426615	0.847359	1	15422	tags=77%, list=69%, signal=245%
KEGG_P53_SIGNALING_PATHWAY	KEGG_P53_SIGNALING_PATHWAY		68	-0.0883886	-0.0883886	0.600402	0.846604	1	9934	tags=53%, list=44%, signal=94%
KEGG_PATHWAYS_IN_CANCER	KEGG_PATHWAYS_IN_CANCER		314	-0.0883007	-0.0883007	0.0194932	0.845855	1	11948	tags=62%, list=53%, signal=130%
KEGG_PANCREATIC_CANCER	KEGG_PANCREATIC_CANCER		70	-0.0871881	-0.0871881	0.630928	0.851814	1	14444	tags=73%, list=64%, signal=203%
ST_T_CELL_SIGNAL_TRANSDUCTION	ST_T_CELL_SIGNAL_TRANSDUCTION		45	-0.0855146	-0.0855146	0.882704	0.861321	1	20589	tags=100%, list=91%, signal=1170%
REACTOME_GPCR_LIGAND_BINDING	REACTOME_GPCR_LIGAND_BINDING		340	-0.0840462	-0.0840462	0.0101626	0.869337	1	3103	tags=22%, list=14%, signal=25%
REACTOME_MAP_KINASE_ACTIVATION_IN_TLR_CASCADE	REACTOME_MAP_KINASE_ACTIVATION_IN_TLR_CASCADE		49	-0.0840024	-0.0840024	0.823647	0.868227	1	16489	tags=82%, list=73%, signal=305%
REACTOME_MEMBRANE_TRAFFICKING	REACTOME_MEMBRANE_TRAFFICKING		122	-0.0837093	-0.0837093	0.351738	0.868804	1	13625	tags=69%, list=61%, signal=174%
REACTOME_DEVELOPMENTAL_BIOLOGY	REACTOME_DEVELOPMENTAL_BIOLOGY		367	-0.0833032	-0.0833032	0.00809717	0.870011	1	9503	tags=50%, list=42%, signal=86%
PID_ER_NONGENOMIC_PATHWAY	PID_ER_NONGENOMIC_PATHWAY		41	-0.0823839	-0.0823839	0.905544	0.874388	1	6934	tags=39%, list=31%, signal=56%
KEGG_NEUROACTIVE_LIGAND_RECEPTOR_INTERACTION	KEGG_NEUROACTIVE_LIGAND_RECEPTOR_INTERACTION		229	-0.0819851	-0.0819851	0.0781563	0.875567	1	3089	tags=22%, list=14%, signal=25%
REACTOME_CELL_SURFACE_INTERACTIONS_AT_THE_VASCULAR_WALL	REACTOME_CELL_SURFACE_INTERACTIONS_AT_THE_VASCULAR_WALL		81	-0.0818966	-0.0818966	0.6	0.874779	1	3722	tags=25%, list=17%, signal=29%
KEGG_PYRUVATE_METABOLISM	KEGG_PYRUVATE_METABOLISM		40	-0.0815001	-0.0815001	0.928279	0.875782	1	9987	tags=52%, list=44%, signal=94%
NABA_ECM_AFFILIATED	NABA_ECM_AFFILIATED		147	-0.08117	-0.08117	0.296154	0.87631	1	5842	tags=34%, list=26%, signal=46%
REACTOME_PPARA_ACTIVATES_GENE_EXPRESSION	REACTOME_PPARA_ACTIVATES_GENE_EXPRESSION		102	-0.0804174	-0.0804174	0.500982	0.879277	1	18722	tags=91%, list=83%, signal=539%
KEGG_LONG_TERM_POTENTIATION	KEGG_LONG_TERM_POTENTIATION		65	-0.0789891	-0.0789891	0.763713	0.886276	1	19352	tags=94%, list=86%, signal=667%
KEGG_B_CELL_RECEPTOR_SIGNALING_PATHWAY	KEGG_B_CELL_RECEPTOR_SIGNALING_PATHWAY		75	-0.0786075	-0.0786075	0.762887	0.887179	1	14444	tags=72%, list=64%, signal=200%
KEGG_PURINE_METABOLISM	KEGG_PURINE_METABOLISM		158	-0.0785605	-0.0785605	0.285444	0.886072	1	15483	tags=77%, list=69%, signal=244%
KEGG_MELANOGENESIS	KEGG_MELANOGENESIS		93	-0.0775627	-0.0775627	0.594262	0.890335	1	3103	tags=22%, list=14%, signal=25%
REACTOME_G_ALPHA_Q_SIGNALLING_EVENTS	REACTOME_G_ALPHA_Q_SIGNALLING_EVENTS		164	-0.0766279	-0.0766279	0.308448	0.894077	1	2818	tags=20%, list=13%, signal=23%
REACTOME_G_ALPHA_S_SIGNALLING_EVENTS	REACTOME_G_ALPHA_S_SIGNALLING_EVENTS		99	-0.0757576	-0.0757576	0.63	0.897376	1	13764	tags=69%, list=61%, signal=176%
PID_PI3KCI_PATHWAY	PID_PI3KCI_PATHWAY		49	-0.0749932	-0.0749932	0.922921	0.9002	1	7504	tags=41%, list=33%, signal=61%
REACTOME_HEMOSTASIS	REACTOME_HEMOSTASIS		428	-0.0736582	-0.0736582	0.0144928	0.905714	1	7578	tags=41%, list=34%, signal=60%
PID_ERBB2_ERBB3_PATHWAY	PID_ERBB2_ERBB3_PATHWAY		44	-0.0713696	-0.0713696	0.953184	0.915863	1	15791	tags=77%, list=70%, signal=258%
REACTOME_GASTRIN_CREB_SIGNALLING_PATHWAY_VIA_PKC_AND_MAPK	REACTOME_GASTRIN_CREB_SIGNALLING_PATHWAY_VIA_PKC_AND_MAPK		185	-0.0713044	-0.0713044	0.290389	0.914782	1	2911	tags=20%, list=13%, signal=23%
PID_IL6_7_PATHWAY	PID_IL6_7_PATHWAY		45	-0.0681357	-0.0681357	0.97996	0.928291	1	4973	tags=29%, list=22%, signal=37%
REACTOME_SIGNALING_BY_PDGF	REACTOME_SIGNALING_BY_PDGF		118	-0.0653096	-0.0653096	0.688623	0.939261	1	2926	tags=19%, list=13%, signal=22%
PID_TCR_PATHWAY	PID_TCR_PATHWAY		66	-0.0614891	-0.0614891	0.954365	0.95286	1	21130	tags=100%, list=94%, signal=1627%
REACTOME_PLATELET_ACTIVATION_SIGNALING_AND_AGGREGATION	REACTOME_PLATELET_ACTIVATION_SIGNALING_AND_AGGREGATION		195	-0.0609848	-0.0609848	0.416185	0.953235	1	11453	tags=57%, list=51%, signal=115%
REACTOME_SIGNALING_BY_FGFR_IN_DISEASE	REACTOME_SIGNALING_BY_FGFR_IN_DISEASE		118	-0.0608375	-0.0608375	0.767782	0.952405	1	19431	tags=92%, list=86%, signal=672%
REACTOME_SIGNALING_BY_FGFR	REACTOME_SIGNALING_BY_FGFR		104	-0.0601445	-0.0601445	0.821429	0.953462	1	19431	tags=92%, list=86%, signal=672%
PID_PDGFRB_PATHWAY	PID_PDGFRB_PATHWAY		128	-0.0563515	-0.0563515	0.808853	0.964565	1	10346	tags=52%, list=46%, signal=95%
REACTOME_SIGNALING_BY_NOTCH1	REACTOME_SIGNALING_BY_NOTCH1		67	-0.0557503	-0.0557503	0.974	0.964958	1	5133	tags=28%, list=23%, signal=37%
REACTOME_IL_3_5_AND_GM_CSF_SIGNALING	REACTOME_IL_3_5_AND_GM_CSF_SIGNALING		42	-0.0557103	-0.0557103	0.997934	0.963635	1	1429	tags=12%, list=6%, signal=13%
REACTOME_SIGNALING_BY_ERBB4	REACTOME_SIGNALING_BY_ERBB4		84	-0.0549546	-0.0549546	0.945631	0.964403	1	3592	tags=21%, list=16%, signal=25%
SIG_PIP3_SIGNALING_IN_CARDIAC_MYOCTES	SIG_PIP3_SIGNALING_IN_CARDIAC_MYOCTES		66	-0.0529584	-0.0529584	0.995902	0.968577	1	10408	tags=52%, list=46%, signal=96%
KEGG_NEUROTROPHIN_SIGNALING_PATHWAY	KEGG_NEUROTROPHIN_SIGNALING_PATHWAY		122	-0.0510788	-0.0510788	0.907787	0.971939	1	10850	tags=53%, list=48%, signal=102%
KEGG_MAPK_SIGNALING_PATHWAY	KEGG_MAPK_SIGNALING_PATHWAY		251	-0.0304201	-0.0304201	0.974659	0.99822	1	2911	tags=16%, list=13%, signal=18%
MSigDB Positively Enriched Pathways
NAME	GS<br> follow link to MSigDB	GS DETAILS	SIZE	ES	NES	NOM p-val	FDR q-val	FWER p-val	RANK AT MAX	LEADING EDGE
REACTOME_ACTIVATED_TAK1_MEDIATES_P38_MAPK_ACTIVATION	REACTOME_ACTIVATED_TAK1_MEDIATES_P38_MAPK_ACTIVATION	Details ...	17	0.327037	0.327037	0.0346939	0.401947	0.992	8532	tags=71%, list=38%, signal=114%
BIOCARTA_TID_PATHWAY	BIOCARTA_TID_PATHWAY	Details ...	17	0.349306	0.349306	0.0326296	0.410595	0.954	5383	tags=59%, list=24%, signal=77%
REACTOME_PROTEOLYTIC_CLEAVAGE_OF_SNARE_COMPLEX_PROTEINS	REACTOME_PROTEOLYTIC_CLEAVAGE_OF_SNARE_COMPLEX_PROTEINS	Details ...	16	0.366425	0.366425	0.0141414	0.421803	0.849	14266	tags=100%, list=63%, signal=273%
KEGG_PHENYLALANINE_METABOLISM	KEGG_PHENYLALANINE_METABOLISM	Details ...	17	0.353891	0.353891	0.0157171	0.450211	0.938	7928	tags=71%, list=35%, signal=109%
KEGG_GLYCOSAMINOGLYCAN_DEGRADATION	KEGG_GLYCOSAMINOGLYCAN_DEGRADATION	Details ...	20	0.327087	0.327087	0.0225873	0.451131	0.992	7274	tags=65%, list=32%, signal=96%
BIOCARTA_SPPA_PATHWAY	BIOCARTA_SPPA_PATHWAY	Details ...	22	0.328331	0.328331	0.0146138	0.500762	0.99	8986	tags=73%, list=40%, signal=121%
PID_TOLL_ENDOGENOUS_PATHWAY	PID_TOLL_ENDOGENOUS_PATHWAY	Details ...	25	0.333852	0.333852	0.00594059	0.506673	0.985	3297	tags=48%, list=15%, signal=56%
PID_INTEGRIN_A9B1_PATHWAY	PID_INTEGRIN_A9B1_PATHWAY	Details ...	24	0.309395	0.309395	0.0112994	0.565184	0.997	2421	tags=42%, list=11%, signal=47%
BIOCARTA_HCMV_PATHWAY	BIOCARTA_HCMV_PATHWAY		17	0.274673	0.274673	0.105751	0.583544	1	15006	tags=94%, list=67%, signal=282%
BIOCARTA_TGFB_PATHWAY	BIOCARTA_TGFB_PATHWAY		19	0.26683	0.26683	0.108987	0.588059	1	16507	tags=100%, list=73%, signal=375%
SA_PTEN_PATHWAY	SA_PTEN_PATHWAY		17	0.264975	0.264975	0.119002	0.591246	1	12576	tags=82%, list=56%, signal=186%
REACTOME_SYNTHESIS_OF_PC	REACTOME_SYNTHESIS_OF_PC		17	0.26825	0.26825	0.121399	0.593488	1	4558	tags=47%, list=20%, signal=59%
REACTOME_GLYCOGEN_BREAKDOWN_GLYCOGENOLYSIS	REACTOME_GLYCOGEN_BREAKDOWN_GLYCOGENOLYSIS		16	0.275789	0.275789	0.14	0.595496	1	6457	tags=56%, list=29%, signal=79%
BIOCARTA_IL22BP_PATHWAY	BIOCARTA_IL22BP_PATHWAY		15	0.243887	0.243887	0.302103	0.596231	1	2016	tags=33%, list=9%, signal=37%
REACTOME_TRAFFICKING_OF_AMPA_RECEPTORS	REACTOME_TRAFFICKING_OF_AMPA_RECEPTORS		25	0.244903	0.244903	0.0735294	0.597553	1	7998	tags=60%, list=36%, signal=93%
BIOCARTA_ETS_PATHWAY	BIOCARTA_ETS_PATHWAY		18	0.196434	0.196434	0.456522	0.599467	1	13088	tags=78%, list=58%, signal=186%
BIOCARTA_P38MAPK_PATHWAY	BIOCARTA_P38MAPK_PATHWAY		39	0.194338	0.194338	0.0923379	0.600122	1	13524	tags=79%, list=60%, signal=199%
REACTOME_RORA_ACTIVATES_CIRCADIAN_EXPRESSION	REACTOME_RORA_ACTIVATES_CIRCADIAN_EXPRESSION		24	0.197354	0.197354	0.266402	0.600128	1	14319	tags=83%, list=64%, signal=229%
REACTOME_NOD1_2_SIGNALING_PATHWAY	REACTOME_NOD1_2_SIGNALING_PATHWAY		30	0.271396	0.271396	0.0122449	0.601603	1	8154	tags=63%, list=36%, signal=99%
KEGG_OTHER_GLYCAN_DEGRADATION	KEGG_OTHER_GLYCAN_DEGRADATION		15	0.269494	0.269494	0.19084	0.602016	1	8943	tags=67%, list=40%, signal=111%
REACTOME_TRAF6_MEDIATED_IRF7_ACTIVATION	REACTOME_TRAF6_MEDIATED_IRF7_ACTIVATION		17	0.259198	0.259198	0.183071	0.60225	1	14030	tags=88%, list=62%, signal=234%
KEGG_PANTOTHENATE_AND_COA_BIOSYNTHESIS	KEGG_PANTOTHENATE_AND_COA_BIOSYNTHESIS		16	0.237107	0.237107	0.286561	0.602581	1	293	tags=25%, list=1%, signal=25%
BIOCARTA_IL1R_PATHWAY	BIOCARTA_IL1R_PATHWAY		31	0.196624	0.196624	0.165354	0.602922	1	15910	tags=90%, list=71%, signal=308%
PID_IFNG_PATHWAY	PID_IFNG_PATHWAY		39	0.195036	0.195036	0.0853175	0.603647	1	12354	tags=74%, list=55%, signal=165%
KEGG_INOSITOL_PHOSPHATE_METABOLISM	KEGG_INOSITOL_PHOSPHATE_METABOLISM		52	0.197534	0.197534	0.0337972	0.603825	1	11579	tags=71%, list=51%, signal=146%
BIOCARTA_CERAMIDE_PATHWAY	BIOCARTA_CERAMIDE_PATHWAY		22	0.194423	0.194423	0.309623	0.604731	1	18136	tags=100%, list=81%, signal=514%
PID_RHODOPSIN_PATHWAY	PID_RHODOPSIN_PATHWAY		22	0.242112	0.242112	0.134766	0.604857	1	4786	tags=45%, list=21%, signal=58%
REACTOME_LATENT_INFECTION_OF_HOMO_SAPIENS_WITH_MYCOBACTERIUM_TUBERCULOSIS	REACTOME_LATENT_INFECTION_OF_HOMO_SAPIENS_WITH_MYCOBACTERIUM_TUBERCULOSIS		30	0.195414	0.195414	0.177645	0.605192	1	2359	tags=30%, list=10%, signal=33%
BIOCARTA_CHEMICAL_PATHWAY	BIOCARTA_CHEMICAL_PATHWAY		22	0.239874	0.239874	0.137795	0.60634	1	9952	tags=68%, list=44%, signal=122%
KEGG_TRYPTOPHAN_METABOLISM	KEGG_TRYPTOPHAN_METABOLISM		40	0.197786	0.197786	0.0745968	0.606992	1	5684	tags=45%, list=25%, signal=60%
REACTOME_OTHER_SEMAPHORIN_INTERACTIONS	REACTOME_OTHER_SEMAPHORIN_INTERACTIONS		15	0.253045	0.253045	0.235537	0.607376	1	1810	tags=33%, list=8%, signal=36%
REACTOME_SYNTHESIS_OF_PIPS_AT_THE_GOLGI_MEMBRANE	REACTOME_SYNTHESIS_OF_PIPS_AT_THE_GOLGI_MEMBRANE		16	0.245285	0.245285	0.252988	0.607559	1	15584	tags=94%, list=69%, signal=305%
PID_CONE_PATHWAY	PID_CONE_PATHWAY		20	0.237541	0.237541	0.196597	0.609981	1	4786	tags=45%, list=21%, signal=57%
REACTOME_TAK1_ACTIVATES_NFKB_BY_PHOSPHORYLATION_AND_ACTIVATION_OF_IKKS_COMPLEX	REACTOME_TAK1_ACTIVATES_NFKB_BY_PHOSPHORYLATION_AND_ACTIVATION_OF_IKKS_COMPLEX		23	0.199624	0.199624	0.273642	0.61019	1	13126	tags=78%, list=58%, signal=188%
BIOCARTA_TALL1_PATHWAY	BIOCARTA_TALL1_PATHWAY		15	0.238499	0.238499	0.297131	0.610912	1	14142	tags=87%, list=63%, signal=233%
ST_GAQ_PATHWAY	ST_GAQ_PATHWAY		27	0.26003	0.26003	0.0348361	0.611633	1	11660	tags=78%, list=52%, signal=161%
BIOCARTA_IL12_PATHWAY	BIOCARTA_IL12_PATHWAY	Details ...	21	0.295434	0.295434	0.0527383	0.61205	1	3002	tags=43%, list=13%, signal=49%
KEGG_SPHINGOLIPID_METABOLISM	KEGG_SPHINGOLIPID_METABOLISM		38	0.197849	0.197849	0.098646	0.612133	1	9177	tags=61%, list=41%, signal=102%
ST_GA12_PATHWAY	ST_GA12_PATHWAY		23	0.246159	0.246159	0.0976562	0.61232	1	8165	tags=61%, list=36%, signal=95%
REACTOME_NUCLEOTIDE_LIKE_PURINERGIC_RECEPTORS	REACTOME_NUCLEOTIDE_LIKE_PURINERGIC_RECEPTORS		16	0.19979	0.19979	0.474409	0.614602	1	3946	tags=38%, list=18%, signal=45%
KEGG_PRION_DISEASES	KEGG_PRION_DISEASES		34	0.19193	0.19193	0.132231	0.616884	1	9588	tags=62%, list=43%, signal=107%
PID_INTEGRIN_CS_PATHWAY	PID_INTEGRIN_CS_PATHWAY		26	0.240094	0.240094	0.0826772	0.617244	1	4124	tags=42%, list=18%, signal=52%
REACTOME_BRANCHED_CHAIN_AMINO_ACID_CATABOLISM	REACTOME_BRANCHED_CHAIN_AMINO_ACID_CATABOLISM		17	0.192332	0.192332	0.513185	0.617861	1	16858	tags=94%, list=75%, signal=375%
BIOCARTA_CXCR4_PATHWAY	BIOCARTA_CXCR4_PATHWAY		23	0.197858	0.197858	0.315369	0.618017	1	15123	tags=87%, list=67%, signal=265%
REACTOME_GAB1_SIGNALOSOME	REACTOME_GAB1_SIGNALOSOME		36	0.205013	0.205013	0.0958904	0.618269	1	13524	tags=81%, list=60%, signal=201%
REACTOME_GLUTAMATE_NEUROTRANSMITTER_RELEASE_CYCLE	REACTOME_GLUTAMATE_NEUROTRANSMITTER_RELEASE_CYCLE		15	0.198293	0.198293	0.574949	0.619099	1	1541	tags=27%, list=7%, signal=29%
REACTOME_CIRCADIAN_REPRESSION_OF_EXPRESSION_BY_REV_ERBA	REACTOME_CIRCADIAN_REPRESSION_OF_EXPRESSION_BY_REV_ERBA		23	0.199949	0.199949	0.268145	0.619133	1	15076	tags=87%, list=67%, signal=263%
KEGG_REGULATION_OF_AUTOPHAGY	KEGG_REGULATION_OF_AUTOPHAGY	Details ...	19	0.283293	0.283293	0.0546875	0.619456	1	11398	tags=79%, list=51%, signal=160%
BIOCARTA_MAPK_PATHWAY	BIOCARTA_MAPK_PATHWAY		87	0.191044	0.191044	0	0.621216	1	14861	tags=85%, list=66%, signal=249%
BIOCARTA_BARRESTIN_SRC_PATHWAY	BIOCARTA_BARRESTIN_SRC_PATHWAY		15	0.246617	0.246617	0.258687	0.622433	1	15460	tags=93%, list=69%, signal=298%
BIOCARTA_TNFR2_PATHWAY	BIOCARTA_TNFR2_PATHWAY		18	0.205171	0.205171	0.356589	0.623449	1	14142	tags=83%, list=63%, signal=224%
REACTOME_REGULATION_OF_SIGNALING_BY_CBL	REACTOME_REGULATION_OF_SIGNALING_BY_CBL	Details ...	18	0.27591	0.27591	0.121399	0.623509	1	15052	tags=94%, list=67%, signal=285%
BIOCARTA_LONGEVITY_PATHWAY	BIOCARTA_LONGEVITY_PATHWAY		15	0.200089	0.200089	0.507431	0.623856	1	15006	tags=87%, list=67%, signal=260%
BIOCARTA_IL10_PATHWAY	BIOCARTA_IL10_PATHWAY		17	0.234481	0.234481	0.25	0.623981	1	15910	tags=94%, list=71%, signal=321%
BIOCARTA_COMP_PATHWAY	BIOCARTA_COMP_PATHWAY	Details ...	17	0.301639	0.301639	0.0918367	0.624116	1	3807	tags=47%, list=17%, signal=57%
SA_MMP_CYTOKINE_CONNECTION	SA_MMP_CYTOKINE_CONNECTION		15	0.253072	0.253072	0.270876	0.625159	1	10813	tags=73%, list=48%, signal=141%
KEGG_ALPHA_LINOLENIC_ACID_METABOLISM	KEGG_ALPHA_LINOLENIC_ACID_METABOLISM		15	0.220468	0.220468	0.37	0.625275	1	5544	tags=47%, list=25%, signal=62%
REACTOME_FORMATION_OF_INCISION_COMPLEX_IN_GG_NER	REACTOME_FORMATION_OF_INCISION_COMPLEX_IN_GG_NER		21	0.202686	0.202686	0.330189	0.625321	1	17950	tags=100%, list=80%, signal=493%
BIOCARTA_HDAC_PATHWAY	BIOCARTA_HDAC_PATHWAY		27	0.190197	0.190197	0.233792	0.625429	1	18232	tags=100%, list=81%, signal=526%
PID_LPA4_PATHWAY	PID_LPA4_PATHWAY		15	0.22125	0.22125	0.405769	0.625442	1	7027	tags=53%, list=31%, signal=77%
REACTOME_CHONDROITIN_SULFATE_BIOSYNTHESIS	REACTOME_CHONDROITIN_SULFATE_BIOSYNTHESIS		18	0.221978	0.221978	0.277567	0.626532	1	1259	tags=28%, list=6%, signal=29%
KEGG_AMINOACYL_TRNA_BIOSYNTHESIS	KEGG_AMINOACYL_TRNA_BIOSYNTHESIS		41	0.200374	0.200374	0.0506073	0.626797	1	17457	tags=98%, list=78%, signal=434%
BIOCARTA_EIF4_PATHWAY	BIOCARTA_EIF4_PATHWAY		24	0.202007	0.202007	0.27	0.626915	1	17028	tags=96%, list=76%, signal=393%
BIOCARTA_ERK5_PATHWAY	BIOCARTA_ERK5_PATHWAY	Details ...	18	0.277956	0.277956	0.0740741	0.62741	1	15006	tags=94%, list=67%, signal=283%
REACTOME_METABOLISM_OF_POLYAMINES	REACTOME_METABOLISM_OF_POLYAMINES		15	0.200854	0.200854	0.546512	0.627514	1	17990	tags=100%, list=80%, signal=498%
REACTOME_COMPLEMENT_CASCADE	REACTOME_COMPLEMENT_CASCADE		25	0.250107	0.250107	0.0646465	0.62757	1	7881	tags=60%, list=35%, signal=92%
KEGG_DORSO_VENTRAL_AXIS_FORMATION	KEGG_DORSO_VENTRAL_AXIS_FORMATION		24	0.201323	0.201323	0.285124	0.628446	1	12354	tags=75%, list=55%, signal=166%
PID_MYC_PATHWAY	PID_MYC_PATHWAY		25	0.224172	0.224172	0.123772	0.628964	1	15667	tags=92%, list=70%, signal=302%
REACTOME_FORMATION_OF_TRANSCRIPTION_COUPLED_NER_TC_NER_REPAIR_COMPLEX	REACTOME_FORMATION_OF_TRANSCRIPTION_COUPLED_NER_TC_NER_REPAIR_COMPLEX		29	0.205294	0.205294	0.130705	0.629031	1	17893	tags=100%, list=79%, signal=487%
BIOCARTA_PGC1A_PATHWAY	BIOCARTA_PGC1A_PATHWAY		23	0.202837	0.202837	0.288889	0.630339	1	17947	tags=100%, list=80%, signal=493%
REACTOME_BOTULINUM_NEUROTOXICITY	REACTOME_BOTULINUM_NEUROTOXICITY	Details ...	18	0.366458	0.366458	0.0237581	0.631617	0.848	14266	tags=100%, list=63%, signal=273%
PID_TRAIL_PATHWAY	PID_TRAIL_PATHWAY		28	0.26014	0.26014	0.0259481	0.631922	1	15052	tags=93%, list=67%, signal=280%
PID_SYNDECAN_4_PATHWAY	PID_SYNDECAN_4_PATHWAY		32	0.203135	0.203135	0.0987903	0.633488	1	3874	tags=38%, list=17%, signal=45%
REACTOME_PYRIMIDINE_METABOLISM	REACTOME_PYRIMIDINE_METABOLISM		24	0.23181	0.23181	0.129594	0.634171	1	414	tags=25%, list=2%, signal=25%
KEGG_LYSOSOME	KEGG_LYSOSOME		120	0.22212	0.22212	0	0.634506	1	5155	tags=45%, list=23%, signal=58%
REACTOME_RIG_I_MDA5_MEDIATED_INDUCTION_OF_IFN_ALPHA_BETA_PATHWAYS	REACTOME_RIG_I_MDA5_MEDIATED_INDUCTION_OF_IFN_ALPHA_BETA_PATHWAYS		59	0.188903	0.188903	0.027027	0.634623	1	12926	tags=76%, list=57%, signal=179%
BIOCARTA_INTRINSIC_PATHWAY	BIOCARTA_INTRINSIC_PATHWAY		20	0.205356	0.205356	0.364372	0.635501	1	1008	tags=25%, list=4%, signal=26%
BIOCARTA_RELA_PATHWAY	BIOCARTA_RELA_PATHWAY		16	0.246849	0.246849	0.233533	0.635681	1	14142	tags=88%, list=63%, signal=235%
BIOCARTA_CCR3_PATHWAY	BIOCARTA_CCR3_PATHWAY	Details ...	20	0.284786	0.284786	0.0818965	0.635714	1	14978	tags=95%, list=67%, signal=284%
BIOCARTA_PML_PATHWAY	BIOCARTA_PML_PATHWAY		17	0.218857	0.218857	0.367556	0.6362	1	6993	tags=53%, list=31%, signal=77%
PID_ANTHRAX_PATHWAY	PID_ANTHRAX_PATHWAY		17	0.247984	0.247984	0.218876	0.637589	1	8986	tags=65%, list=40%, signal=108%
BIOCARTA_ATRBRCA_PATHWAY	BIOCARTA_ATRBRCA_PATHWAY		21	0.185312	0.185312	0.417154	0.637819	1	16197	tags=90%, list=72%, signal=322%
KEGG_RENIN_ANGIOTENSIN_SYSTEM	KEGG_RENIN_ANGIOTENSIN_SYSTEM		16	0.205711	0.205711	0.443595	0.638438	1	2406	tags=31%, list=11%, signal=35%
REACTOME_ACTIVATED_AMPK_STIMULATES_FATTY_ACID_OXIDATION_IN_MUSCLE	REACTOME_ACTIVATED_AMPK_STIMULATES_FATTY_ACID_OXIDATION_IN_MUSCLE		18	0.224201	0.224201	0.280318	0.639074	1	6211	tags=50%, list=28%, signal=69%
BIOCARTA_TOLL_PATHWAY	BIOCARTA_TOLL_PATHWAY		37	0.253472	0.253472	0.00598802	0.63926	1	6470	tags=54%, list=29%, signal=76%
REACTOME_TRANSFERRIN_ENDOCYTOSIS_AND_RECYCLING	REACTOME_TRANSFERRIN_ENDOCYTOSIS_AND_RECYCLING		24	0.185602	0.185602	0.349174	0.639437	1	16459	tags=92%, list=73%, signal=341%
PID_RAS_PATHWAY	PID_RAS_PATHWAY		30	0.222345	0.222345	0.0770791	0.641748	1	7756	tags=57%, list=34%, signal=86%
BIOCARTA_RAS_PATHWAY	BIOCARTA_RAS_PATHWAY		23	0.184028	0.184028	0.4	0.642009	1	15434	tags=87%, list=69%, signal=276%
REACTOME_TRAF6_MEDIATED_NFKB_ACTIVATION	REACTOME_TRAF6_MEDIATED_NFKB_ACTIVATION		21	0.181367	0.181367	0.449799	0.642548	1	14142	tags=81%, list=63%, signal=218%
KEGG_FC_GAMMA_R_MEDIATED_PHAGOCYTOSIS	KEGG_FC_GAMMA_R_MEDIATED_PHAGOCYTOSIS		96	0.187602	0.187602	0.00201207	0.643422	1	9159	tags=59%, list=41%, signal=100%
REACTOME_IL1_SIGNALING	REACTOME_IL1_SIGNALING		39	0.181688	0.181688	0.121951	0.643774	1	9191	tags=59%, list=41%, signal=100%
REACTOME_PI3K_EVENTS_IN_ERBB2_SIGNALING	REACTOME_PI3K_EVENTS_IN_ERBB2_SIGNALING		41	0.182081	0.182081	0.11157	0.644077	1	11829	tags=71%, list=53%, signal=149%
BIOCARTA_NKCELLS_PATHWAY	BIOCARTA_NKCELLS_PATHWAY		20	0.224632	0.224632	0.229008	0.644377	1	11829	tags=75%, list=53%, signal=158%
REACTOME_BMAL1_CLOCK_NPAS2_ACTIVATES_CIRCADIAN_EXPRESSION	REACTOME_BMAL1_CLOCK_NPAS2_ACTIVATES_CIRCADIAN_EXPRESSION		35	0.185606	0.185606	0.142558	0.644609	1	14478	tags=83%, list=64%, signal=232%
KEGG_PHOSPHATIDYLINOSITOL_SIGNALING_SYSTEM	KEGG_PHOSPHATIDYLINOSITOL_SIGNALING_SYSTEM		72	0.205732	0.205732	0.00421941	0.645779	1	12890	tags=78%, list=57%, signal=181%
PID_BETA_CATENIN_DEG_PATHWAY	PID_BETA_CATENIN_DEG_PATHWAY		18	0.231848	0.231848	0.234	0.646301	1	13542	tags=83%, list=60%, signal=209%
KEGG_ABC_TRANSPORTERS	KEGG_ABC_TRANSPORTERS		42	0.185908	0.185908	0.0951456	0.646495	1	4933	tags=40%, list=22%, signal=52%
KEGG_GLYCOSAMINOGLYCAN_BIOSYNTHESIS_HEPARAN_SULFATE	KEGG_GLYCOSAMINOGLYCAN_BIOSYNTHESIS_HEPARAN_SULFATE		24	0.18638	0.18638	0.357278	0.646659	1	5187	tags=42%, list=23%, signal=54%
KEGG_BETA_ALANINE_METABOLISM	KEGG_BETA_ALANINE_METABOLISM		21	0.18406	0.18406	0.403226	0.646754	1	2291	tags=29%, list=10%, signal=32%
PID_WNT_CANONICAL_PATHWAY	PID_WNT_CANONICAL_PATHWAY		20	0.182202	0.182202	0.470954	0.647689	1	17285	tags=95%, list=77%, signal=409%
BIOCARTA_PAR1_PATHWAY	BIOCARTA_PAR1_PATHWAY		37	0.183058	0.183058	0.142285	0.647966	1	7444	tags=51%, list=33%, signal=77%
REACTOME_PIP3_ACTIVATES_AKT_SIGNALING	REACTOME_PIP3_ACTIVATES_AKT_SIGNALING		27	0.214201	0.214201	0.143713	0.648937	1	13524	tags=81%, list=60%, signal=204%
REACTOME_INFLAMMASOMES	REACTOME_INFLAMMASOMES	Details ...	16	0.289685	0.289685	0.119919	0.649687	1	1924	tags=38%, list=9%, signal=41%
KEGG_GLYCOSPHINGOLIPID_BIOSYNTHESIS_GANGLIO_SERIES	KEGG_GLYCOSPHINGOLIPID_BIOSYNTHESIS_GANGLIO_SERIES		15	0.210598	0.210598	0.458753	0.650607	1	13269	tags=80%, list=59%, signal=195%
PID_IL1_PATHWAY	PID_IL1_PATHWAY		34	0.186512	0.186512	0.155556	0.650612	1	15006	tags=85%, list=67%, signal=255%
KEGG_NICOTINATE_AND_NICOTINAMIDE_METABOLISM	KEGG_NICOTINATE_AND_NICOTINAMIDE_METABOLISM	Details ...	24	0.296259	0.296259	0.0295276	0.650738	1	5530	tags=54%, list=25%, signal=72%
KEGG_GLYCEROLIPID_METABOLISM	KEGG_GLYCEROLIPID_METABOLISM		45	0.21469	0.21469	0.0214844	0.651651	1	4680	tags=42%, list=21%, signal=53%
KEGG_SNARE_INTERACTIONS_IN_VESICULAR_TRANSPORT	KEGG_SNARE_INTERACTIONS_IN_VESICULAR_TRANSPORT		38	0.182262	0.182262	0.159751	0.651922	1	14266	tags=82%, list=63%, signal=222%
PID_P38_MKK3_6PATHWAY	PID_P38_MKK3_6PATHWAY		26	0.207138	0.207138	0.217647	0.652033	1	14388	tags=85%, list=64%, signal=234%
REACTOME_EFFECTS_OF_PIP2_HYDROLYSIS	REACTOME_EFFECTS_OF_PIP2_HYDROLYSIS	Details ...	23	0.278581	0.278581	0.0503145	0.652075	1	4500	tags=48%, list=20%, signal=60%
BIOCARTA_TFF_PATHWAY	BIOCARTA_TFF_PATHWAY		21	0.213212	0.213212	0.276986	0.652508	1	12354	tags=76%, list=55%, signal=169%
BIOCARTA_MAL_PATHWAY	BIOCARTA_MAL_PATHWAY		19	0.20578	0.20578	0.347826	0.652922	1	17880	tags=100%, list=79%, signal=486%
REACTOME_INTRINSIC_PATHWAY	REACTOME_INTRINSIC_PATHWAY		16	0.215278	0.215278	0.354582	0.653034	1	784	tags=25%, list=3%, signal=26%
REACTOME_RIP_MEDIATED_NFKB_ACTIVATION_VIA_DAI	REACTOME_RIP_MEDIATED_NFKB_ACTIVATION_VIA_DAI		18	0.253968	0.253968	0.172269	0.653189	1	1790	tags=33%, list=8%, signal=36%
REACTOME_ACYL_CHAIN_REMODELLING_OF_PE	REACTOME_ACYL_CHAIN_REMODELLING_OF_PE		17	0.206358	0.206358	0.38417	0.653924	1	4626	tags=41%, list=21%, signal=52%
BIOCARTA_PTDINS_PATHWAY	BIOCARTA_PTDINS_PATHWAY		23	0.224633	0.224633	0.154618	0.655682	1	11585	tags=74%, list=51%, signal=152%
PID_IL8_CXCR2_PATHWAY	PID_IL8_CXCR2_PATHWAY	Details ...	34	0.286219	0.286219	0.00833333	0.656026	1	10779	tags=76%, list=48%, signal=147%
REACTOME_SYNTHESIS_OF_PIPS_AT_THE_PLASMA_MEMBRANE	REACTOME_SYNTHESIS_OF_PIPS_AT_THE_PLASMA_MEMBRANE		29	0.21155	0.21155	0.129436	0.656213	1	16200	tags=93%, list=72%, signal=332%
KEGG_GALACTOSE_METABOLISM	KEGG_GALACTOSE_METABOLISM		24	0.207983	0.207983	0.204	0.657651	1	14080	tags=83%, list=63%, signal=222%
PID_RHOA_REG_PATHWAY	PID_RHOA_REG_PATHWAY		46	0.208602	0.208602	0.042	0.658612	1	7057	tags=52%, list=31%, signal=76%
BIOCARTA_MITOCHONDRIA_PATHWAY	BIOCARTA_MITOCHONDRIA_PATHWAY		21	0.20726	0.20726	0.282	0.658632	1	11416	tags=71%, list=51%, signal=145%
REACTOME_NRAGE_SIGNALS_DEATH_THROUGH_JNK	REACTOME_NRAGE_SIGNALS_DEATH_THROUGH_JNK		42	0.210639	0.210639	0.032	0.658651	1	7057	tags=52%, list=31%, signal=76%
REACTOME_CGMP_EFFECTS	REACTOME_CGMP_EFFECTS		19	0.209181	0.209181	0.337398	0.659664	1	4772	tags=42%, list=21%, signal=53%
PID_HIV_NEF_PATHWAY	PID_HIV_NEF_PATHWAY		35	0.215403	0.215403	0.0690377	0.660833	1	11879	tags=74%, list=53%, signal=157%
BIOCARTA_STRESS_PATHWAY	BIOCARTA_STRESS_PATHWAY		25	0.211909	0.211909	0.201195	0.660863	1	14142	tags=84%, list=63%, signal=226%
REACTOME_SYNTHESIS_OF_BILE_ACIDS_AND_BILE_SALTS_VIA_7ALPHA_HYDROXYCHOLESTEROL	REACTOME_SYNTHESIS_OF_BILE_ACIDS_AND_BILE_SALTS_VIA_7ALPHA_HYDROXYCHOLESTEROL		15	0.225073	0.225073	0.424901	0.661329	1	6941	tags=53%, list=31%, signal=77%
REACTOME_NUCLEOTIDE_BINDING_DOMAIN_LEUCINE_RICH_REPEAT_CONTAINING_RECEPTOR_NLR_SIGNALING_PATHWAYS	REACTOME_NUCLEOTIDE_BINDING_DOMAIN_LEUCINE_RICH_REPEAT_CONTAINING_RECEPTOR_NLR_SIGNALING_PATHWAYS		45	0.21591	0.21591	0.0336842	0.664001	1	8154	tags=58%, list=36%, signal=90%
BIOCARTA_NFKB_PATHWAY	BIOCARTA_NFKB_PATHWAY		23	0.225609	0.225609	0.134122	0.666078	1	14499	tags=87%, list=64%, signal=244%
BIOCARTA_MYOSIN_PATHWAY	BIOCARTA_MYOSIN_PATHWAY		29	0.227213	0.227213	0.0849802	0.669861	1	7310	tags=55%, list=32%, signal=82%
KEGG_HISTIDINE_METABOLISM	KEGG_HISTIDINE_METABOLISM		28	0.226042	0.226042	0.0984848	0.673014	1	12603	tags=79%, list=56%, signal=178%
KEGG_ETHER_LIPID_METABOLISM	KEGG_ETHER_LIPID_METABOLISM		29	0.227546	0.227546	0.0813492	0.678085	1	4974	tags=45%, list=22%, signal=57%
REACTOME_PRE_NOTCH_EXPRESSION_AND_PROCESSING	REACTOME_PRE_NOTCH_EXPRESSION_AND_PROCESSING		42	0.171165	0.171165	0.155769	0.678778	1	14375	tags=81%, list=64%, signal=224%
REACTOME_PRE_NOTCH_TRANSCRIPTION_AND_TRANSLATION	REACTOME_PRE_NOTCH_TRANSCRIPTION_AND_TRANSLATION		27	0.176838	0.176838	0.361746	0.679875	1	14364	tags=81%, list=64%, signal=225%
KEGG_NOD_LIKE_RECEPTOR_SIGNALING_PATHWAY	KEGG_NOD_LIKE_RECEPTOR_SIGNALING_PATHWAY		58	0.170223	0.170223	0.0686275	0.680235	1	8208	tags=53%, list=36%, signal=84%
REACTOME_METABOLISM_OF_VITAMINS_AND_COFACTORS	REACTOME_METABOLISM_OF_VITAMINS_AND_COFACTORS		50	0.169793	0.169793	0.123552	0.680496	1	14643	tags=82%, list=65%, signal=234%
KEGG_GLYCEROPHOSPHOLIPID_METABOLISM	KEGG_GLYCEROPHOSPHOLIPID_METABOLISM		72	0.170427	0.170427	0.0245399	0.68249	1	4616	tags=38%, list=21%, signal=47%
REACTOME_RNA_POL_II_PRE_TRANSCRIPTION_EVENTS	REACTOME_RNA_POL_II_PRE_TRANSCRIPTION_EVENTS		59	0.171581	0.171581	0.039916	0.683154	1	17893	tags=97%, list=79%, signal=470%
REACTOME_ACYL_CHAIN_REMODELLING_OF_PC	REACTOME_ACYL_CHAIN_REMODELLING_OF_PC		18	0.17118	0.17118	0.581673	0.683212	1	16157	tags=89%, list=72%, signal=315%
REACTOME_INTERFERON_ALPHA_BETA_SIGNALING	REACTOME_INTERFERON_ALPHA_BETA_SIGNALING		49	0.17318	0.17318	0.105882	0.683268	1	4378	tags=37%, list=19%, signal=46%
REACTOME_MITOCHONDRIAL_TRNA_AMINOACYLATION	REACTOME_MITOCHONDRIAL_TRNA_AMINOACYLATION		21	0.176945	0.176945	0.492901	0.683528	1	17457	tags=95%, list=78%, signal=424%
KEGG_PRIMARY_BILE_ACID_BIOSYNTHESIS	KEGG_PRIMARY_BILE_ACID_BIOSYNTHESIS		16	0.172732	0.172732	0.651394	0.683632	1	1741	tags=25%, list=8%, signal=27%
PID_TXA2PATHWAY	PID_TXA2PATHWAY		57	0.175607	0.175607	0.0433071	0.684134	1	8298	tags=54%, list=37%, signal=86%
BIOCARTA_SPRY_PATHWAY	BIOCARTA_SPRY_PATHWAY		18	0.173469	0.173469	0.57197	0.684679	1	12354	tags=72%, list=55%, signal=160%
REACTOME_PLATELET_SENSITIZATION_BY_LDL	REACTOME_PLATELET_SENSITIZATION_BY_LDL		15	0.171824	0.171824	0.737805	0.684711	1	18643	tags=100%, list=83%, signal=582%
SIG_IL4RECEPTOR_IN_B_LYPHOCYTES	SIG_IL4RECEPTOR_IN_B_LYPHOCYTES		27	0.172108	0.172108	0.323651	0.686104	1	12803	tags=74%, list=57%, signal=172%
REACTOME_TRNA_AMINOACYLATION	REACTOME_TRNA_AMINOACYLATION		42	0.177111	0.177111	0.118644	0.686764	1	17457	tags=95%, list=78%, signal=424%
REACTOME_INSULIN_RECEPTOR_RECYCLING	REACTOME_INSULIN_RECEPTOR_RECYCLING		21	0.173661	0.173661	0.518812	0.68723	1	16459	tags=90%, list=73%, signal=336%
BIOCARTA_GH_PATHWAY	BIOCARTA_GH_PATHWAY		27	0.175622	0.175622	0.342	0.688993	1	12724	tags=74%, list=57%, signal=170%
ST_WNT_CA2_CYCLIC_GMP_PATHWAY	ST_WNT_CA2_CYCLIC_GMP_PATHWAY		20	0.173916	0.173916	0.555785	0.68916	1	14095	tags=80%, list=63%, signal=214%
KEGG_VALINE_LEUCINE_AND_ISOLEUCINE_DEGRADATION	KEGG_VALINE_LEUCINE_AND_ISOLEUCINE_DEGRADATION		43	0.17429	0.17429	0.125	0.689545	1	17022	tags=93%, list=76%, signal=381%
BIOCARTA_FMLP_PATHWAY	BIOCARTA_FMLP_PATHWAY		35	0.17433	0.17433	0.229126	0.694041	1	17947	tags=97%, list=80%, signal=479%
BIOCARTA_GCR_PATHWAY	BIOCARTA_GCR_PATHWAY		19	0.163198	0.163198	0.588119	0.699497	1	17653	tags=95%, list=78%, signal=439%
REACTOME_RNA_POL_I_TRANSCRIPTION_INITIATION	REACTOME_RNA_POL_I_TRANSCRIPTION_INITIATION		24	0.163537	0.163537	0.460938	0.699884	1	17893	tags=96%, list=79%, signal=467%
REACTOME_SPHINGOLIPID_DE_NOVO_BIOSYNTHESIS	REACTOME_SPHINGOLIPID_DE_NOVO_BIOSYNTHESIS		29	0.167703	0.167703	0.328657	0.700134	1	14081	tags=79%, list=63%, signal=212%
REACTOME_HS_GAG_DEGRADATION	REACTOME_HS_GAG_DEGRADATION		20	0.162713	0.162713	0.625243	0.700935	1	1967	tags=25%, list=9%, signal=27%
PID_CERAMIDE_PATHWAY	PID_CERAMIDE_PATHWAY		48	0.163689	0.163689	0.144928	0.702313	1	14142	tags=79%, list=63%, signal=213%
ST_ERK1_ERK2_MAPK_PATHWAY	ST_ERK1_ERK2_MAPK_PATHWAY		31	0.163957	0.163957	0.324903	0.703332	1	14466	tags=81%, list=64%, signal=225%
REACTOME_IMMUNOREGULATORY_INTERACTIONS_BETWEEN_A_LYMPHOID_AND_A_NON_LYMPHOID_CELL	REACTOME_IMMUNOREGULATORY_INTERACTIONS_BETWEEN_A_LYMPHOID_AND_A_NON_LYMPHOID_CELL		62	0.165856	0.165856	0.0589474	0.703577	1	3537	tags=32%, list=16%, signal=38%
REACTOME_SYNTHESIS_OF_BILE_ACIDS_AND_BILE_SALTS	REACTOME_SYNTHESIS_OF_BILE_ACIDS_AND_BILE_SALTS		19	0.165414	0.165414	0.595876	0.704213	1	6941	tags=47%, list=31%, signal=68%
REACTOME_SULFUR_AMINO_ACID_METABOLISM	REACTOME_SULFUR_AMINO_ACID_METABOLISM		24	0.16496	0.16496	0.466165	0.704921	1	17861	tags=96%, list=79%, signal=464%
SIG_CD40PATHWAYMAP	SIG_CD40PATHWAYMAP		34	0.161234	0.161234	0.283925	0.705468	1	12926	tags=74%, list=57%, signal=172%
REACTOME_NEGATIVE_REGULATORS_OF_RIG_I_MDA5_SIGNALING	REACTOME_NEGATIVE_REGULATORS_OF_RIG_I_MDA5_SIGNALING		30	0.166404	0.166404	0.351464	0.706046	1	12765	tags=73%, list=57%, signal=169%
REACTOME_ENDOSOMAL_SORTING_COMPLEX_REQUIRED_FOR_TRANSPORT_ESCRT	REACTOME_ENDOSOMAL_SORTING_COMPLEX_REQUIRED_FOR_TRANSPORT_ESCRT		26	0.166031	0.166031	0.429787	0.706085	1	12715	tags=73%, list=56%, signal=168%
BIOCARTA_HER2_PATHWAY	BIOCARTA_HER2_PATHWAY		22	0.161835	0.161835	0.600815	0.706886	1	12730	tags=73%, list=57%, signal=167%
BIOCARTA_P53HYPOXIA_PATHWAY	BIOCARTA_P53HYPOXIA_PATHWAY		22	0.164002	0.164002	0.576	0.707152	1	10635	tags=64%, list=47%, signal=121%
PID_TNF_PATHWAY	PID_TNF_PATHWAY		45	0.161423	0.161423	0.171429	0.707427	1	11879	tags=69%, list=53%, signal=146%
REACTOME_GLYCOSPHINGOLIPID_METABOLISM	REACTOME_GLYCOSPHINGOLIPID_METABOLISM		35	0.159912	0.159912	0.304082	0.708128	1	12483	tags=71%, list=55%, signal=160%
PID_ARF6_TRAFFICKING_PATHWAY	PID_ARF6_TRAFFICKING_PATHWAY		48	0.166575	0.166575	0.114519	0.708765	1	7981	tags=52%, list=35%, signal=81%
PID_KIT_PATHWAY	PID_KIT_PATHWAY		52	0.160583	0.160583	0.132	0.708931	1	15006	tags=83%, list=67%, signal=248%
REACTOME_GLUCOSE_TRANSPORT	REACTOME_GLUCOSE_TRANSPORT		36	0.164019	0.164019	0.228571	0.711417	1	18822	tags=100%, list=84%, signal=610%
KEGG_COMPLEMENT_AND_COAGULATION_CASCADES	KEGG_COMPLEMENT_AND_COAGULATION_CASCADES		63	0.159939	0.159939	0.0821053	0.712014	1	3912	tags=33%, list=17%, signal=40%
[truncated: 195 more rows]
